# Supplementary material for: Coupling of α,α-difluoro-substituted organozinc reagents with 1-bromoalkynes
Source: publisher site journal article supplement (doi:10.3762/bjoc.11.231), 2015-11-10

**Supporting information**  
**for**  
**Coupling of  $\alpha,\alpha$ -difluoro-substituted organozinc reagents with 1-**  
**bromoalkynes**

Artem A. Zemtsov<sup>1</sup>, Alexander D. Volodin<sup>1,2</sup>, Vitalij V. Levin<sup>1</sup>, Marina I. Struchkova<sup>1</sup>

and Alexander D. Dilman<sup>1,\*</sup>

Address: <sup>1</sup>N. D. Zelinsky Institute of Organic Chemistry, 119991 Moscow, Leninsky prosp. 47, Russian Federation and <sup>2</sup>Higher Chemical College, Russian Academy of Sciences, 125047 Moscow, Miusskaya sq. 9, Russian Federation

Email: Alexander D. Dilman - [adil25@mail.ru](mailto:adil25@mail.ru)

\*Corresponding

**Full experimental details, compound characterization,  
and copies of NMR spectra**

**General**

All reactions were performed under an argon atmosphere. THF was distilled under argon from LiAlH<sub>4</sub> prior to use. DMF was distilled under argon from P<sub>2</sub>O<sub>5</sub> and stored over MS 4 Å. CH<sub>3</sub>CN was distilled from P<sub>2</sub>O<sub>5</sub> and CaH<sub>2</sub> and stored over MS 4 Å. Column chromatography was carried out employing silica gel (230–400 mesh). Precoated silica gel plates F-254 were used for thin-layer analytical chromatography visualizing with UV and/or acidic aq. KMnO<sub>4</sub> solution.

NMR spectra were recorded with a Bruker AM-300 instrument. <sup>1</sup>H NMR chemical shifts were determined relative to the signal of a residual protonated solvent: CDCl<sub>3</sub> ( $\delta$  = 7.26 ppm). <sup>13</sup>C NMR chemical shifts were determined relative to the signal of solvent: CDCl<sub>3</sub> ( $\delta$  = 77.16 ppm). High resolution mass spectra (HRMS) were measured using electrospray ionization (ESI) and a time-of-flight (TOF) mass analyzer. The measurements were done in a positive ion mode (interface capillary voltage—4500 V) or in a negative ion mode (3200 V); mass range from *m/z* 50 to *m/z* 3000.

Organozinc reagents **1a,b,d** were prepared by the protocol described in our previous work<sup>1</sup>. Reagent **1c** was obtained from 3-bromopropyl benzoate and zinc using the standard procedure<sup>1a</sup> with the reaction time 7 days. Bromoalkynes **3**<sup>2</sup> were prepared by a modified literature protocol.

<sup>1</sup> (a) Levin, V. V.; Zemtsov, A. A.; Struchkova, M. I.; Dilman, A. D. *Org. Lett.* **2013**, *15*, 917–919. (b) Levin, V. V.; Zemtsov, A. A.; Struchkova, M. I.; Dilman, A. D. *J. Fluorine Chem.* **2015**, *171*, 97–101.

<sup>2</sup> Feng, Y.-S.; Xu, Z.-Q.; Mao, L.; Zhang, F.-F.; Xu, H.-J. *Org. Lett.* **2013**, *15*, 1472–1475.

### Preparation of bromoalkynes 3b–d.

Triphenylphosphine (30.0 mmol, 7.86 g) was slowly added to a stirred solution of aldehyde (10.0 mmol) and  $\text{CBr}_4$  (15.0 mmol, 4.98 g) in dry  $\text{CH}_2\text{Cl}_2$  (20 mL) at 0 °C. The resulting suspension was stirred at this temperature for 1 hour, warmed to room temperature and then diluted with hexane (40 mL). The mixture was quenched with water (40 mL), then the organic layer was separated and filtered through a shot silica gel pad. The solution was concentrated in vacuum. The resulting 2,2-dibromostyrene was dissolved in  $\text{CH}_2\text{Cl}_2$  (10 mL) and treated with a solution of KOH (50 mmol, 2.8 g) in water (2 mL). Then, benzyltriethylammonium chloride (2.0 mmol, 0.46 g) was added and the reaction mixture was vigorously stirred for 6 hours at room temperature (the conversion of 2,2-dibromostyrene was monitored by GC analysis). The reaction was quenched with water (40 mL) and extracted with hexane ( $3 \times 20$  mL). The combined organic layers were concentrated under vacuum and the residue was purified by column chromatography.

### Preparation of bromoalkynes 3a-Br and 3e–h

Silver nitrate (0.1 mmol, 17 mg) was added to a solution of alkyne (10.0 mmol) and *N*-bromosuccinimide (11.0 mmol, 1.96 g) in acetone (10 mL) at room temperature. The reaction was stirred overnight, quenched with water (30 mL) and extracted with hexane ( $3 \times 10$  mL). The combined organic layers were concentrated under vacuum and the residue was purified by column chromatography.

### General procedure for preparation of reagents 2a,c,e from $\text{BrCF}_2\text{CO}_2\text{K}$

The freshly titrated solution of organozinc reagent **1** (3.0 mmol) in THF was concentrated in vacuum and the resulting viscous residue was dissolved in DMF (4 mL). Then  $\text{BrCF}_2\text{CO}_2\text{K}$  (4.5 mmol, 0.96 g) was added and the resulting clear solution was vigorously stirred at 50 °C for approximately 50 minutes. The conversion was checked by GC analysis of a brominated aliquote. After completion the concentration of **2** was determined by  $^{19}\text{F}$  NMR with  $\text{PhCF}_3$  as an internal standard (~0.45 M).

### General procedure for preparation of reagents 2b,d from $\text{Me}_3\text{SiCF}_2\text{Br}$

A freshly titrated solution of organozinc reagent **1** (3.0 mmol) in THF was concentrated under vacuum and the resulting viscous residue was dissolved in  $\text{CH}_3\text{CN}$  (3 mL). Then, sodium acetate (3.6 mmol, 295 mg) and  $\text{Me}_3\text{SiCF}_2\text{Br}$  (3.6 mmol, 731 mg) were added at –20 °C. The reaction mixture was stirred for 18 hours at this temperature and then concentrated under vacuum at 0 °C. The residue was dissolved in DMF (3 mL). The concentration of **2** was determined by  $^{19}\text{F}$  NMR with  $\text{PhCF}_3$  as an internal standard (~0.55 M).

### General procedure for coupling reaction

A titrated solution of **2** (1.5 mmol) was cooled to 0 °C with an ice bath and then bromoalkyne **1** (1.0 mmol) and CuI (0.05 mmol, 9.5 mg) were added. The stirred suspension was allowed to slowly warm to room temperature for 2 hours and then stirred for additional 16 hours. The resulting mixture was quenched with aqueous HCl (0.5 M, 6 mL) and extracted with Et<sub>2</sub>O (3 × 5 mL). The combined organic layers were concentrated under vacuum.

For acetylenes **3a-Br**, **3b-f**, the product **4** was purified by column chromatography.

For acetylenes **3g,h**, the residue was dissolved in a mixture of AcOH (3 mL), THF (1 mL) and water (1 mL) and kept for 8 hours at 40 °C. The mixture was diluted with CH<sub>2</sub>Cl<sub>2</sub> (10 mL) and carefully washed with water (3 × 10 mL) and saturated Na<sub>2</sub>CO<sub>3</sub> solution (10 mL). The organic layer was concentrated under vacuum and the residue was purified by column chromatography.

### (3,3-Difluorobut-1-yne-1,4-diyl)dibenzene (**4a**)

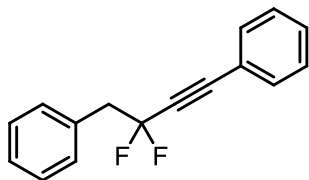

Yield 191 mg (79%). Colorless oil.  $R_f$  = 0.33 (Hexane/CH<sub>2</sub>Cl<sub>2</sub>, 20:1).

<sup>1</sup>H NMR (300 MHz, CDCl<sub>3</sub>),  $\delta$ : 3.51 (t,  $J$  = 14.2 Hz, 2H), 7.31–7.53 (m, 10H).

<sup>13</sup>C{<sup>1</sup>H} NMR (75 MHz, CDCl<sub>3</sub>),  $\delta$ : 46.0 (t,  $J$  = 27.5 Hz), 81.7 (t,  $J$  = 40.4 Hz), 88.2 (t,  $J$  = 6.9 Hz), 114.5 (t,  $J$  = 233.8 Hz), 120.3 (t,  $J$  = 2.9 Hz), 127.9, 128.5, 128.6, 130.0, 130.8, 132.2 (t,  $J$  = 2.3 Hz), 132.3 (t,  $J$  = 4.0 Hz).

<sup>19</sup>F NMR (282 MHz, CDCl<sub>3</sub>),  $\delta$ : –82.4 (t,  $J$  = 14.2 Hz).

Calcd for C<sub>16</sub>H<sub>12</sub>F<sub>2</sub> (242.26): C 79.32, H 4.99. Found: C 79.18, H 5.15.

### Methyl 4-(3,3-difluoro-4-phenylbut-1-yn-1-yl)benzoate (**4b**)

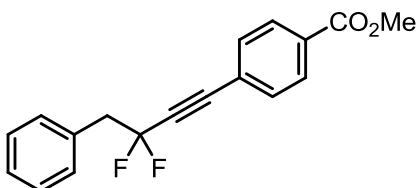

Yield 252 mg (84%). Colorless solid. Mp 64–65 °C.  $R_f$  = 0.35 (Hexane/EtOAc, 10:1).

<sup>1</sup>H NMR (300 MHz, CDCl<sub>3</sub>),  $\delta$ : 3.47 (t,  $J$  = 14.5 Hz, 2H), 3.93 (s, 3H), 7.30–7.42 (m, 5H), 7.48 (d,  $J$  = 8.3 Hz, 2H), 8.02 (d,  $J$  = 8.3 Hz, 2H).

<sup>13</sup>C{<sup>1</sup>H} NMR (75 MHz, CDCl<sub>3</sub>),  $\delta$ : 45.7 (t,  $J$  = 27.2 Hz), 52.3, 83.9 (t,  $J$  = 40.7 Hz), 87.0 (t,  $J$  = 6.9 Hz), 114.2 (t,  $J$  = 234.5 Hz), 124.6 (t,  $J$  = 2.6 Hz), 127.9, 128.6, 129.6, 130.7, 131.2, 132.0 (t,  $J$  = 2.2 Hz), 166.1.

<sup>19</sup>F NMR (282 MHz, CDCl<sub>3</sub>),  $\delta$ : –83.0 (t,  $J$  = 14.5 Hz).

Calcd for C<sub>18</sub>H<sub>14</sub>F<sub>2</sub>O<sub>2</sub> (300.30): C 71.99, H 4.70. Found: C 71.91, H 4.78.

#### 1-(3,3-Difluoro-4-phenylbut-1-yn-1-yl)-2-iodobenzene (4c)

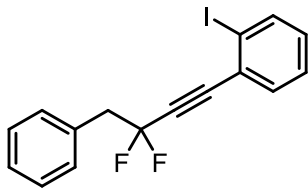

Yield 302 mg (82%). Colorless solid. Mp 73–74 °C.  $R_f$  = 0.28 (Hexane/ $\text{CH}_2\text{Cl}_2$ , 10:1).

$^1\text{H}$  NMR (300 MHz,  $\text{CDCl}_3$ ),  $\delta$ : 3.56 (t,  $J$  = 14.6 Hz, 2H), 7.09 (td,  $J$  = 7.8, 1.7 Hz, 1H), 7.30–7.53 (m, 7H), 7.87 (d,  $J$  = 7.8 Hz, 1H).

$^{13}\text{C}\{^1\text{H}\}$  NMR (75 MHz,  $\text{CDCl}_3$ ),  $\delta$ : 45.8 (t,  $J$  = 27.2 Hz), 84.8 (t,  $J$  = 40.6 Hz), 89.2 (t,  $J$  = 6.9 Hz), 100.4 (t,  $J$  = 2.5 Hz), 114.2 (t,  $J$  = 234.5 Hz), 127.0 (t,  $J$  = 2.6 Hz), 127.9 (d,  $J$  = 8.9 Hz), 128.5, 130.9, 131.0, 131.9 (t,  $J$  = 3.9 Hz), 133.6 (t,  $J$  = 1.9 Hz), 139.0.

$^{19}\text{F}$  NMR (282 MHz,  $\text{CDCl}_3$ ),  $\delta$ : –82.6 (t,  $J$  = 14.6 Hz).

Calcd for  $\text{C}_{16}\text{H}_{11}\text{F}_2\text{I}$  (368.16): C 52.20, H 3.01. Found: C 52.05, H 3.07.

#### 1-(3,3-Difluoro-4-phenylbut-1-yn-1-yl)-4-fluorobenzene (4d)

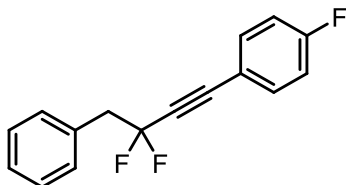

Yield 182 mg (70%). Colorless oil.  $R_f$  = 0.31 (Hexane/ $\text{CH}_2\text{Cl}_2$ , 20:1).

$^1\text{H}$  NMR (300 MHz,  $\text{CDCl}_3$ ),  $\delta$ : 3.49 (t,  $J$  = 14.2 Hz, 2H), 7.06 (dd,  $J$  = 8.7 Hz, 2H), 7.35–7.51 (m, 7H).

$^{13}\text{C}\{^1\text{H}\}$  NMR (75 MHz,  $\text{CDCl}_3$ ),  $\delta$ : 45.9 (t,  $J$  = 27.5 Hz), 81.5 (td,  $J$  = 40.7, 1.6), 87.2 (t,  $J$  = 6.9 Hz), 114.4 (t,  $J$  = 234.0 Hz), 116.0 (d,  $J$  = 22.4 Hz), 116.4 (dt,  $J$  = 3.4, 2.9 Hz), 127.9, 128.5, 130.8, 132.3 (t,  $J$  = 4.0 Hz), 134.2 (dt,  $J$  = 8.6, 2.3 Hz), 163.6 (d,  $J$  = 252.4 Hz).

$^{19}\text{F}$  NMR (282 MHz,  $\text{CDCl}_3$ ),  $\delta$ : –108.7 (tt, 1F,  $J$  = 8.7, 4.8 Hz), –82.5 (t, 2F,  $J$  = 14.2 Hz).

Calcd for  $\text{C}_{16}\text{H}_{11}\text{F}_3$  (260.25): C 73.84, H 4.26. Found: C 73.74, H 4.37.

#### Ethyl 4,4-difluoro-5-phenylpent-2-ynoate (4e)

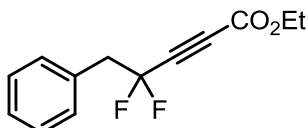

Yield 200 mg (84%). Colorless oil.  $R_f$  = 0.33 (Hexane/ $\text{EtOAc}$ , 15:1).

$^1\text{H}$  NMR (300 MHz,  $\text{CDCl}_3$ ),  $\delta$ : 1.33 (t,  $J$  = 7.2 Hz, 3H), 3.39 (t,  $J$  = 15.1 Hz, 2H), 4.27 (q,  $J$  = 7.2 Hz, 2H), 7.29–7.40 (m, 5H).

$^{13}\text{C}\{^1\text{H}\}$  NMR (75 MHz,  $\text{CDCl}_3$ ),  $\delta$ : 14.0, 45.2 (t,  $J$  = 25.9 Hz), 62.8, 77.8 (t,  $J$  = 6.8 Hz), 113.1 (t,  $J$  = 237.0 Hz), 128.2, 128.7, 130.7, 130.8, 151.9 (t,  $J$  = 2.2 Hz).

$^{19}\text{F}$  NMR (282 MHz,  $\text{CDCl}_3$ ),  $\delta$ : –86.3 (t,  $J$  = 15.1 Hz).

Calcd for  $\text{C}_{13}\text{H}_{12}\text{F}_2\text{O}_2$  (238.23): C 65.54, H 5.08. Found: C 65.48, H 5.19.

#### 4,4-Difluoro-5-phenylpent-2-yn-1-yl benzoate (4f)

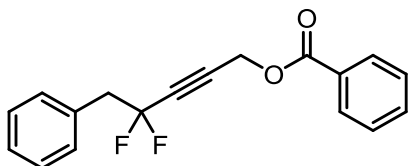

Yield 201 mg (67%). Colorless oil.  $R_f$  = 0.21 (Hexane/EtOAc, 15:1).

$^1\text{H}$  NMR (300 MHz,  $\text{CDCl}_3$ ),  $\delta$ : 3.39 (t,  $J$  = 14.7 Hz, 2H), 4.95 (t,  $J$  = 4.1 Hz, 2H), 7.28–7.41 (m, 5H), 7.51 (dd,  $J$  = 7.6, 7.0 Hz, 2H), 7.64 (t,  $J$  = 7.6 Hz, 1H), 8.11 (d,  $J$  = 7.0 Hz, 2H).

$^{13}\text{C}\{^1\text{H}\}$  NMR (75 MHz,  $\text{CDCl}_3$ ),  $\delta$ : 45.5 (t,  $J$  = 26.7 Hz), 51.7 (t,  $J$  = 2.0 Hz), 79.2 (t,  $J$  = 6.6 Hz), 82.7 (t,  $J$  = 41.0 Hz), 113.5 (t,  $J$  = 234.6 Hz), 127.8, 128.4, 128.6, 129.2, 129.9, 130.7, 131.7 (t,  $J$  = 4.0 Hz), 133.6, 165.5.

$^{19}\text{F}$  NMR (282 MHz,  $\text{CDCl}_3$ ),  $\delta$ : –83.9 (tt,  $J$  = 14.7, 4.1 Hz).

HRMS (ESI): calcd for  $\text{C}_{18}\text{H}_{14}\text{F}_2\text{O}_2\text{Na}$  ( $M + \text{Na}$ ) 323.0854, found 323.0846.

#### 4,4-Difluoro-5-phenylpent-2-yn-1-ol (4g)

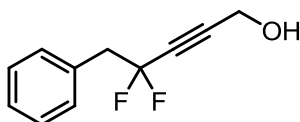

Yield 157 mg (80%). Pale yellow oil.  $R_f$  = 0.19 (Hexane/EtOAc, 4:1).

$^1\text{H}$  NMR (300 MHz,  $\text{CDCl}_3$ ),  $\delta$ : 2.31 (s, 1H), 3.35 (t,  $J$  = 14.5 Hz, 2H), 4.23 (s, 2H), 7.29–7.39 (m, 5H).

$^{13}\text{C}\{^1\text{H}\}$  NMR (75 MHz,  $\text{CDCl}_3$ ),  $\delta$ : 45.6 (t,  $J$  = 27.1 Hz), 50.5 (t,  $J$  = 1.9 Hz), 78.5 (t,  $J$  = 40.5 Hz), 86.6 (t,  $J$  = 6.6 Hz), 113.7 (t,  $J$  = 234.1 Hz), 127.9, 128.5, 130.7, 132.0 (t,  $J$  = 4.0 Hz).

$^{19}\text{F}$  NMR (282 MHz,  $\text{CDCl}_3$ ),  $\delta$ : –83.1 (t,  $J$  = 14.5 Hz).

Calcd for  $\text{C}_{11}\text{H}_{10}\text{F}_2\text{O}$  (196.19): C 67.34, H 5.14. Found: C 67.26, H 5.01.

#### 5,5-Difluoro-6-phenylhex-3-yn-1-ol (4h)

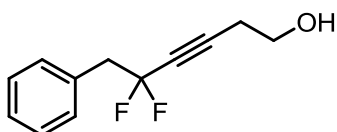

Yield 158 mg (75%). Pale yellow oil.  $R_f$  = 0.20 (Hexane/EtOAc, 4:1).

$^1\text{H}$  NMR (300 MHz,  $\text{CDCl}_3$ ),  $\delta$ : 2.45 (tt,  $J$  = 5.9, 5.0, 2H), 2.46 (s, 1H), 3.35 (t,  $J$  = 14.3 Hz, 2H), 3.64 (t,  $J$  = 5.9 Hz, 2H), 7.28–7.43 (m, 5H).

$^{13}\text{C}\{^1\text{H}\}$  NMR (75 MHz,  $\text{CDCl}_3$ ),  $\delta$ : 22.6 (t,  $J$  = 2.0 Hz), 45.7 (t,  $J$  = 27.5 Hz), 60.1 (t,  $J$  = 1.9 Hz), 75.1 (t,  $J$  = 40.1 Hz), 87.1 (t,  $J$  = 6.6 Hz), 113.9 (t,  $J$  = 233.2 Hz), 127.8, 128.4, 130.6, 132.4 (t,  $J$  = 4.1 Hz).

$^{19}\text{F}$  NMR (282 MHz,  $\text{CDCl}_3$ ),  $\delta$ : –81.7 (tt,  $J$  = 14.3, 5.0 Hz).

Calcd for  $\text{C}_{12}\text{H}_{12}\text{F}_2\text{O}$  (210.22): C 68.56, H 5.75. Found: C 68.77, H 5.71.

**Methyl 4-(2,2-difluoro-4-phenylbut-3-yn-1-yl)benzoate (4i)**

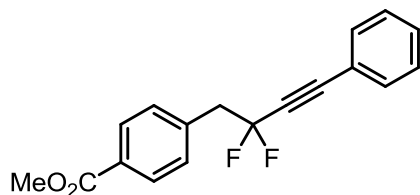

Yield 240 mg (80%). Colorless crystals. Mp 70–71 °C.  $R_f$  = 0.24 (Hexane/EtOAc, 10:1).

$^1\text{H}$  NMR (300 MHz,  $\text{CDCl}_3$ ),  $\delta$ : 3.49 (t,  $J$  = 14.0 Hz, 2H), 3.92 (s, 3H), 7.28–7.50 (m, 7H), 8.04 (d, 2H,  $J$  = 8.2 Hz).

$^{13}\text{C}\{^1\text{H}\}$  NMR (75 MHz,  $\text{CDCl}_3$ ),  $\delta$ : 45.9 (t,  $J$  = 27.8 Hz), 52.2, 81.2 (t,  $J$  = 40.2 Hz), 88.5 (t,  $J$  = 6.9 Hz), 113.9 (t,  $J$  = 234.3 Hz), 120.0 (t,  $J$  = 2.6 Hz), 128.6, 129.7, 129.9, 130.1, 130.8, 132.1 (t,  $J$  = 2.3 Hz), 137.4 (t,  $J$  = 4.0 Hz), 166.9.

$^{19}\text{F}$  NMR (282 MHz,  $\text{CDCl}_3$ ),  $\delta$ : –82.2 (t,  $J$  = 14.0 Hz).

HRMS (ESI): calcd for  $\text{C}_{18}\text{H}_{14}\text{F}_2\text{O}_2\text{Na}$  ( $M + \text{Na}$ ) 323.0854, found 323.0847.

**Diethyl (3,3-difluoro-5-phenylpent-4-yn-1-yl)phosphonate (4j)**

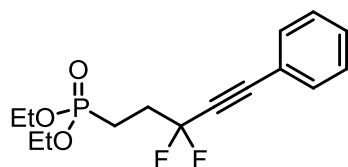

Yield 253 mg (81%). Pale yellow oil.  $R_f$  = 0.14 (Hexane/EtOAc, 1:1).

$^1\text{H}$  NMR (300 MHz,  $\text{CDCl}_3$ ),  $\delta$ : 1.34 (t,  $J$  = 7.1 Hz, 6H), 1.97–2.12 (m, 2H), 2.32–2.52 (m, 2H), 4.06–4.22 (m, 4H), 7.31–7.52 (m, 5H).

$^{13}\text{C}\{^1\text{H}\}$  NMR (75 MHz,  $\text{CDCl}_3$ ),  $\delta$ : 16.5 (d,  $J$  = 5.9 Hz), 19.8 (dt,  $J$  = 145.8, 3.3 Hz), 33.3 (td,  $J$  = 28.7, 3.5 Hz), 62.2 (d,  $J$  = 6.5 Hz), 80.8 (t,  $J$  = 40.5 Hz), 87.7 (t,  $J$  = 5.6 Hz), 114.5 (td,  $J$  = 233.2, 23.6 Hz), 120.0 (t,  $J$  = 2.6 Hz), 128.6, 130.2, 132.3 (t,  $J$  = 2.0 Hz).

$^{19}\text{F}$  NMR (282 MHz,  $\text{CDCl}_3$ ),  $\delta$ : –85.0 (t,  $J$  = 13.9 Hz).

HRMS (ESI): calcd for  $\text{C}_{15}\text{H}_{19}\text{F}_2\text{O}_3\text{PNa}$  ( $M + \text{Na}$ ) 339.0932, found 339.0938.

**4,4-Difluoro-6-phenylhex-5-yn-1-yl benzoate (4k)**

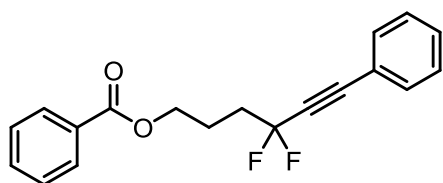

Yield 226 mg (72%). Colorless oil.  $R_f$  = 0.21 (Hexane/EtOAc, 15:1).

$^1\text{H}$  NMR (300 MHz,  $\text{CDCl}_3$ ),  $\delta$ : 2.09–2.22 (m, 2H), 2.27–2.46 (m, 2H), 4.45 (t,  $J$  = 6.2 Hz, 2H), 7.30–7.61 (m, 8H), 8.08 (d,  $J$  = 7.3 Hz, 2H).

$^{13}\text{C}\{^1\text{H}\}$  NMR (75 MHz,  $\text{CDCl}_3$ ),  $\delta$ : 22.8 (t,  $J$  = 3.4 Hz), 36.4 (t,  $J$  = 27.3 Hz), 63.8, 81.5 (t,  $J$  = 40.4 Hz), 87.2 (t,  $J$  = 6.9 Hz), 115.1 (t,  $J$  = 232.6 Hz), 120.1 (t,  $J$  = 2.9 Hz), 128.5, 128.6, 129.8, 130.0, 130.3, 132.2 (t,  $J$  = 2.3 Hz), 133.1, 166.5.

$^{19}\text{F}$  NMR (282 MHz,  $\text{CDCl}_3$ ),  $\delta$ : –83.0 (t,  $J$  = 14.4 Hz).

Calcd for C<sub>19</sub>H<sub>16</sub>F<sub>2</sub>O<sub>2</sub> (314.33): C 72.60, H 5.13. Found: C 72.41, H 5.19.

**4,4-Difluoro-7-hydroxyhept-5-yn-1-yl benzoate (4l)**

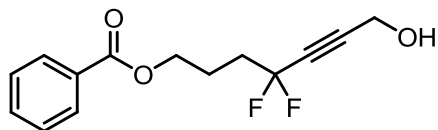

Yield 190 mg (71%). Pale yellow oil.  $R_f$  = 0.28 (Hexane/EtOAc, 2:1).

<sup>1</sup>H NMR (300 MHz, CDCl<sub>3</sub>),  $\delta$ : 1.98–2.12 (m, 2H), 2.13–2.32 (m, 2H), 2.61 (t,  $J$  = 6.2 Hz, 1H), 4.31–4.43 (m, 4H), 7.45 (t,  $J$  = 7.5 Hz, 2H), 7.57 (t,  $J$  = 7.4 Hz, 1H), 8.03 (dd,  $J$  = 7.5, 7.4 Hz, 2H).

<sup>13</sup>C{<sup>1</sup>H} NMR (75 MHz, CDCl<sub>3</sub>),  $\delta$ : 22.5 (t,  $J$  = 3.8 Hz), 36.0 (t,  $J$  = 26.9 Hz), 50.5 (t,  $J$  = 1.7 Hz), 63.8, 78.3 (t,  $J$  = 40.7 Hz), 86.0 (t,  $J$  = 6.6 Hz), 114.4 (t,  $J$  = 232.7 Hz), 128.6, 129.7, 130.0, 133.2, 166.8.

<sup>19</sup>F NMR (282 MHz, CDCl<sub>3</sub>),  $\delta$ : –83.8 (t,  $J$  = 14.3 Hz).

HRMS (ESI): calcd for C<sub>14</sub>H<sub>14</sub>F<sub>2</sub>O<sub>3</sub>Na (M + Na) 291.0803, found 291.0801.

**4,4-Difluoro-7-hydroxy-3-methylhept-5-yn-1-yl benzoate (4m)**

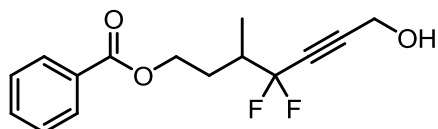

Yield 175 mg (62%). Pale yellow oil.  $R_f$  = 0.18 (Hexane/EtOAc, 4:1).

<sup>1</sup>H NMR (300 MHz, CDCl<sub>3</sub>),  $\delta$ : 1.16 (d,  $J$  = 6.9 Hz, 3H), 1.71 (qt,  $J$  = 6.1, 5.8 Hz, 1H), 2.14–2.37 (m, 2H), 2.80 (s, 1H), 4.31–4.46 (m, 4H), 7.43 (dd,  $J$  = 8.3, 7.1 Hz, 2H), 7.56 (tt,  $J$  = 7.1, 1.2 Hz, 1H), 8.02 (dd,  $J$  = 8.3, 1.2 Hz, 2H).

<sup>13</sup>C{<sup>1</sup>H} NMR (75 MHz, CDCl<sub>3</sub>),  $\delta$ : 13.5 (t,  $J$  = 4.0 Hz), 29.6 (t,  $J$  = 2.9 Hz), 39.1 (t,  $J$  = 25.0 Hz), 50.4 (t,  $J$  = 2.0 Hz), 62.7, 77.3 (m), 86.7 (t,  $J$  = 6.9 Hz), 116.8 (t,  $J$  = 235.2 Hz), 128.5, 129.7, 130.1, 133.2, 166.9.

<sup>19</sup>F NMR (282 MHz, CDCl<sub>3</sub>),  $\delta$ : –89.7 (m).

HRMS (ESI): calcd for C<sub>15</sub>H<sub>16</sub>F<sub>2</sub>O<sub>3</sub>Na (M + Na) 305.0960, found 305.0954.

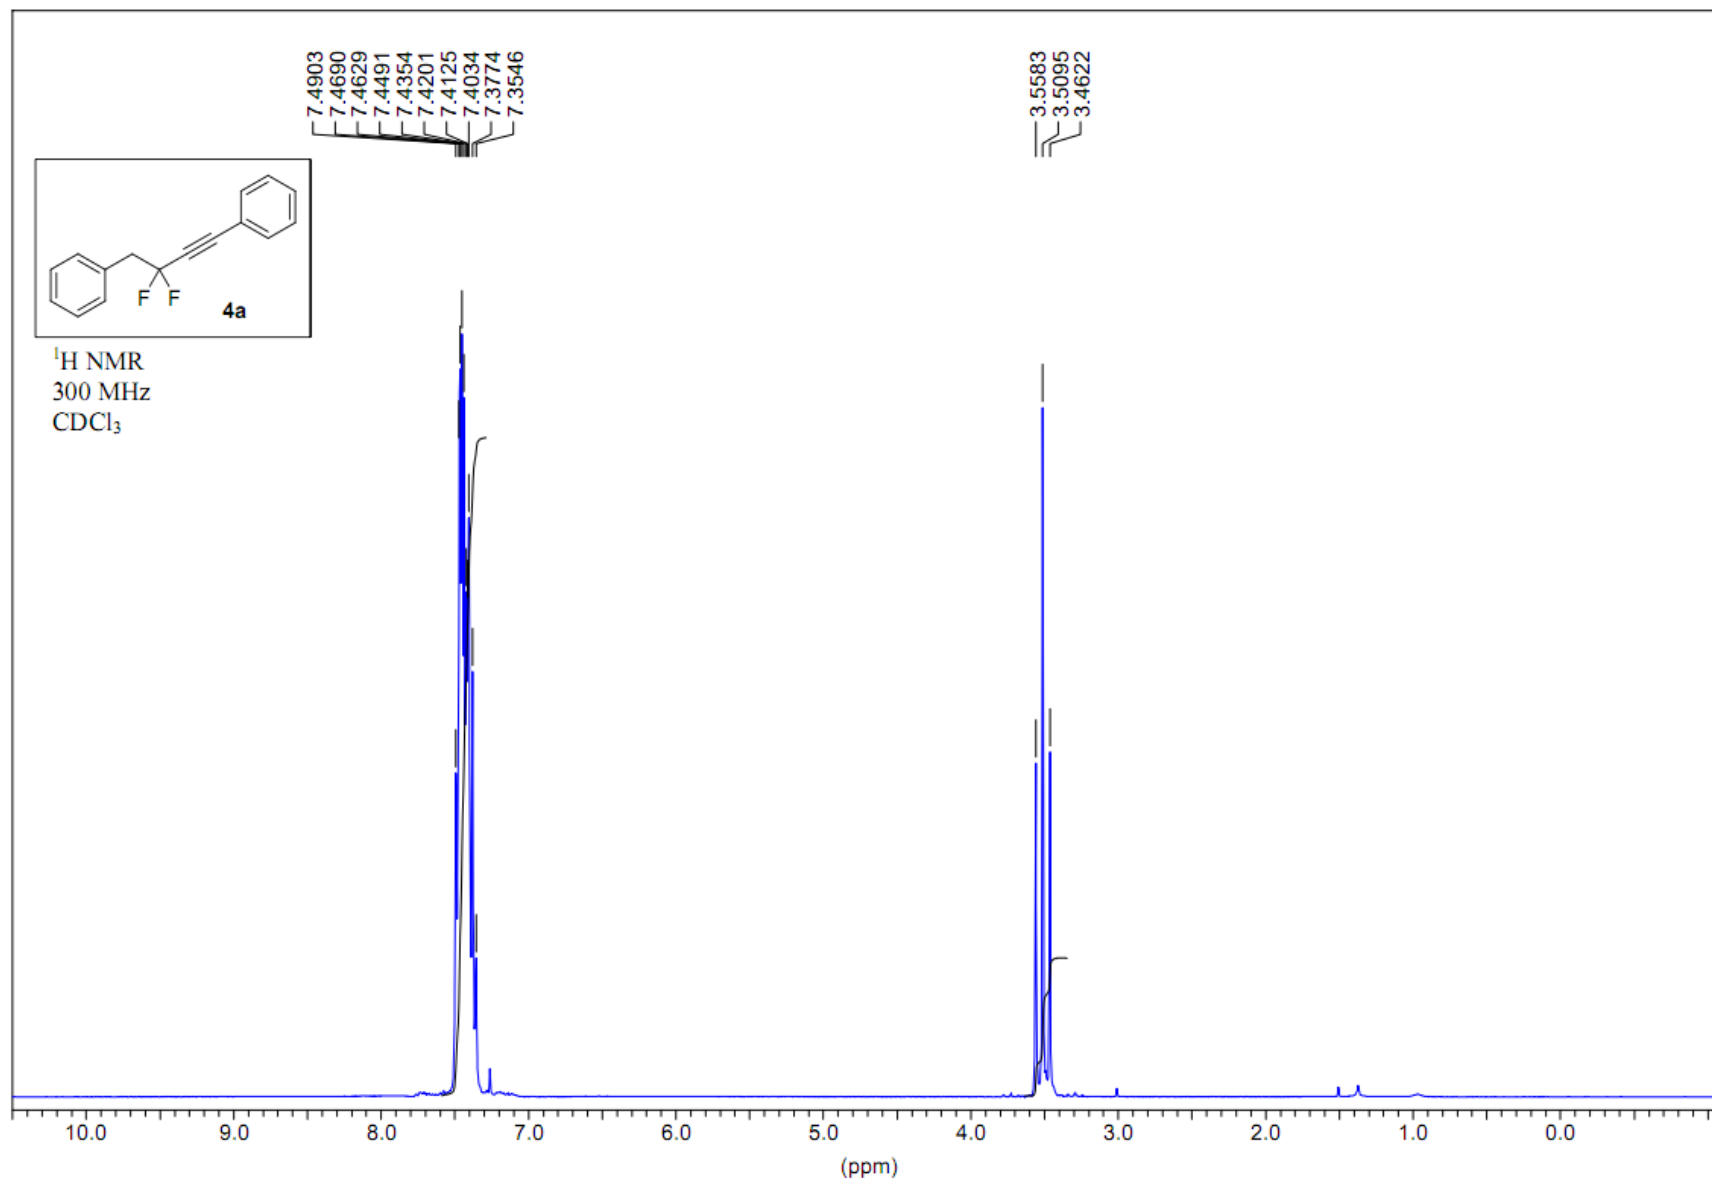



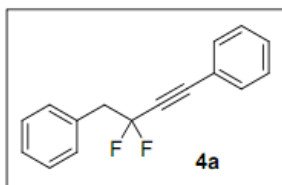

$^{13}\text{C}\{^1\text{H}\}$  NMR  
75 MHz  
 $\text{CDCl}_3$

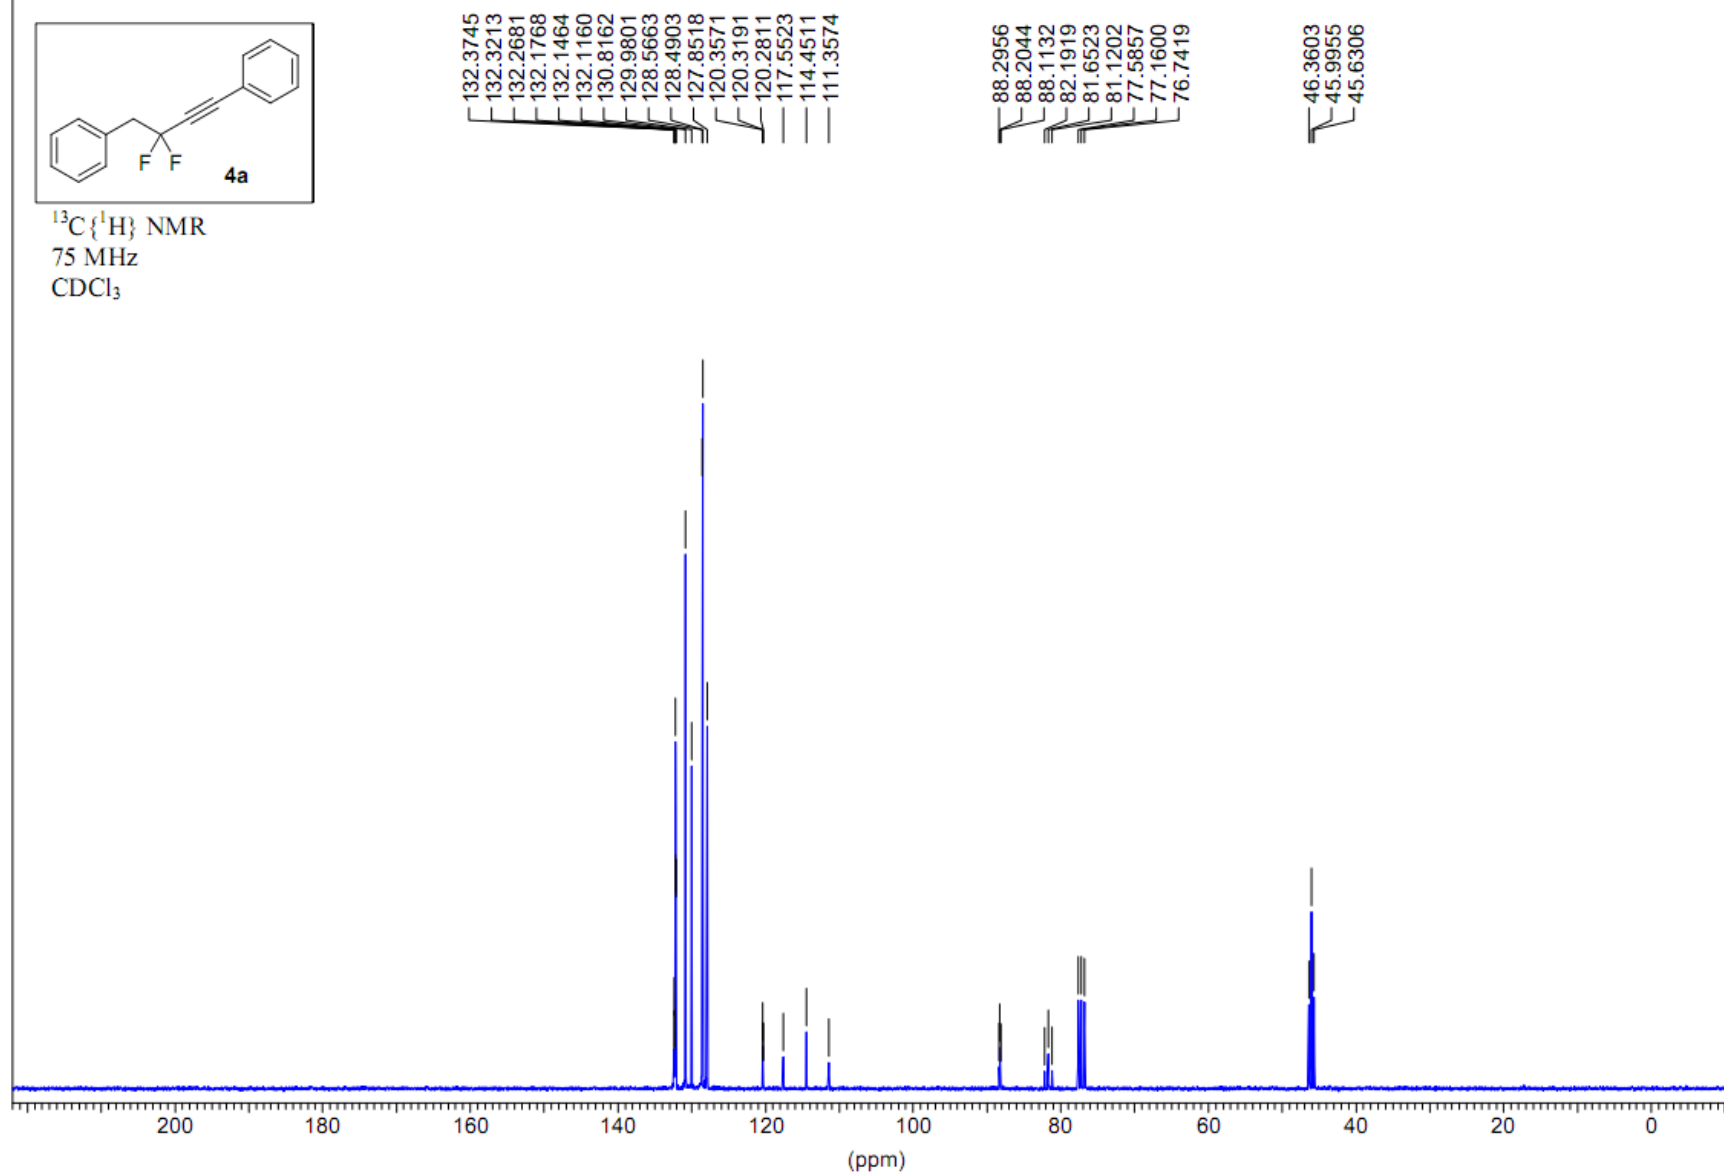

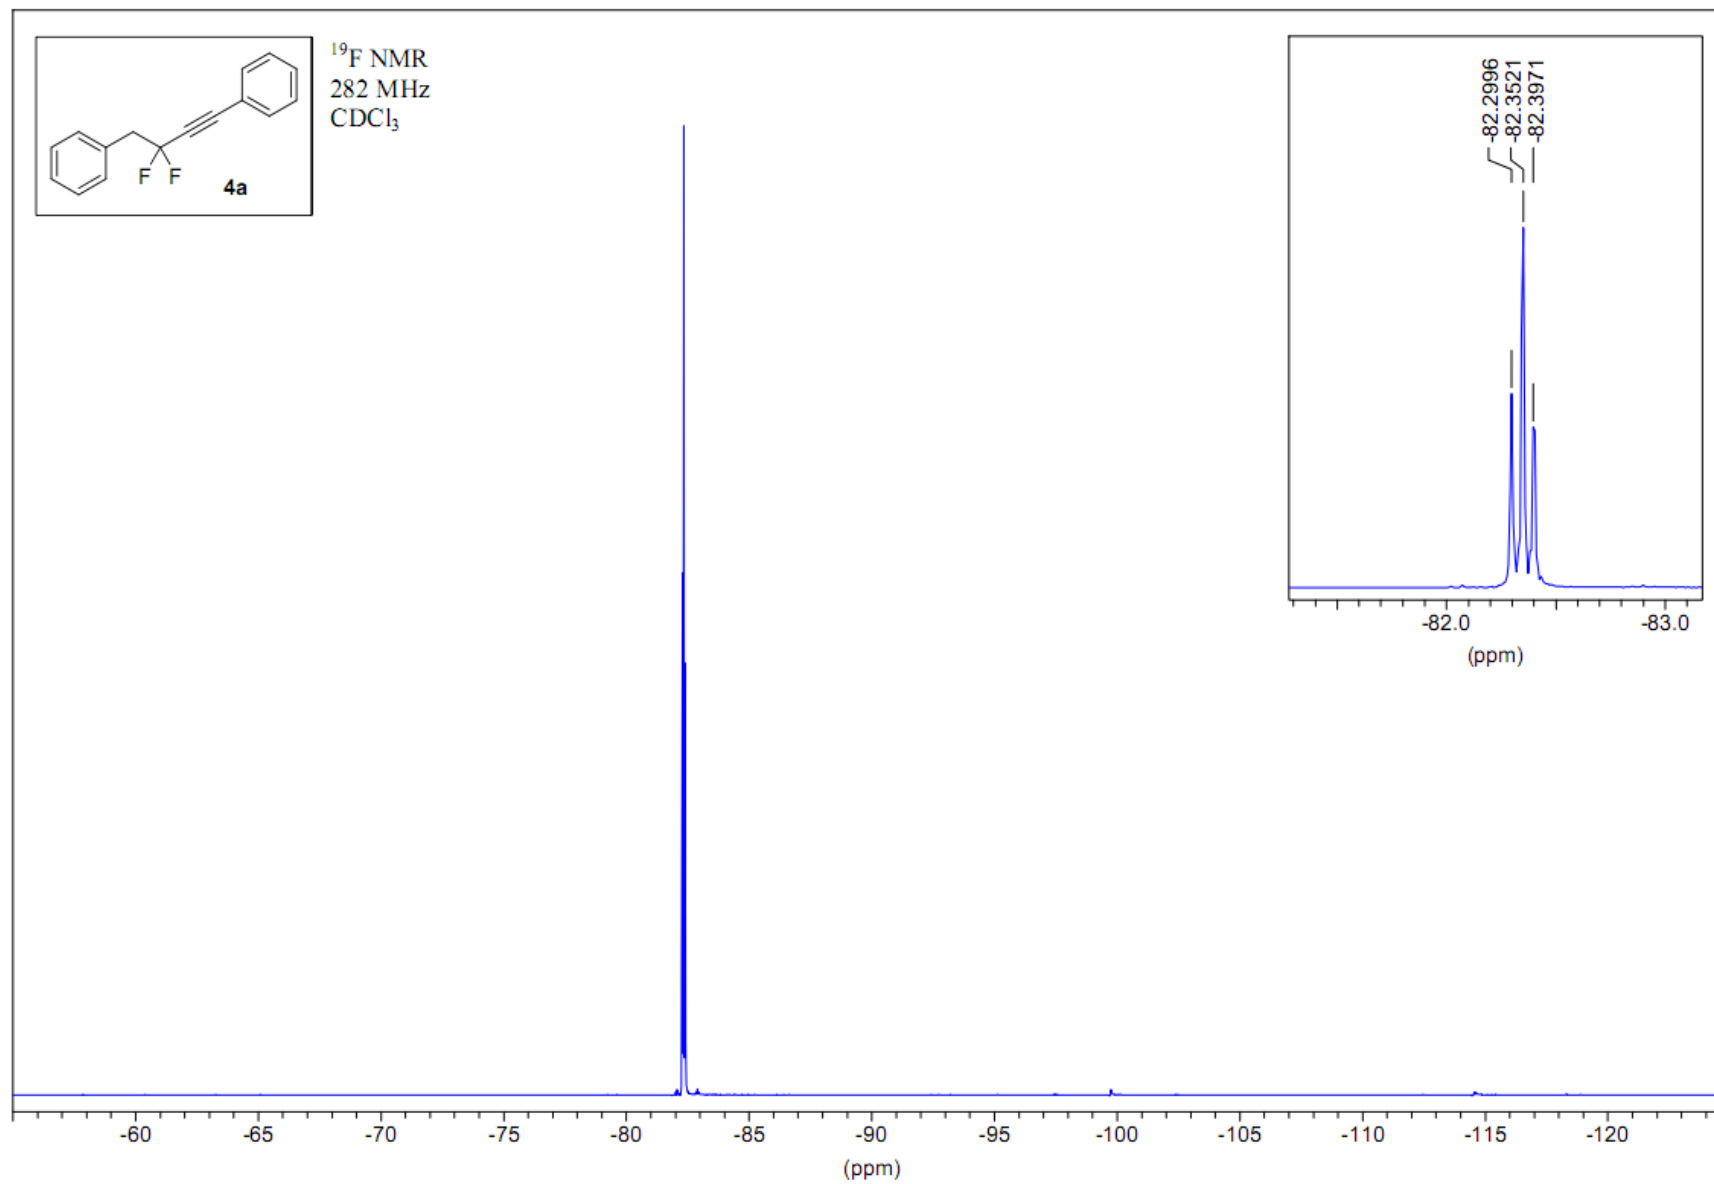

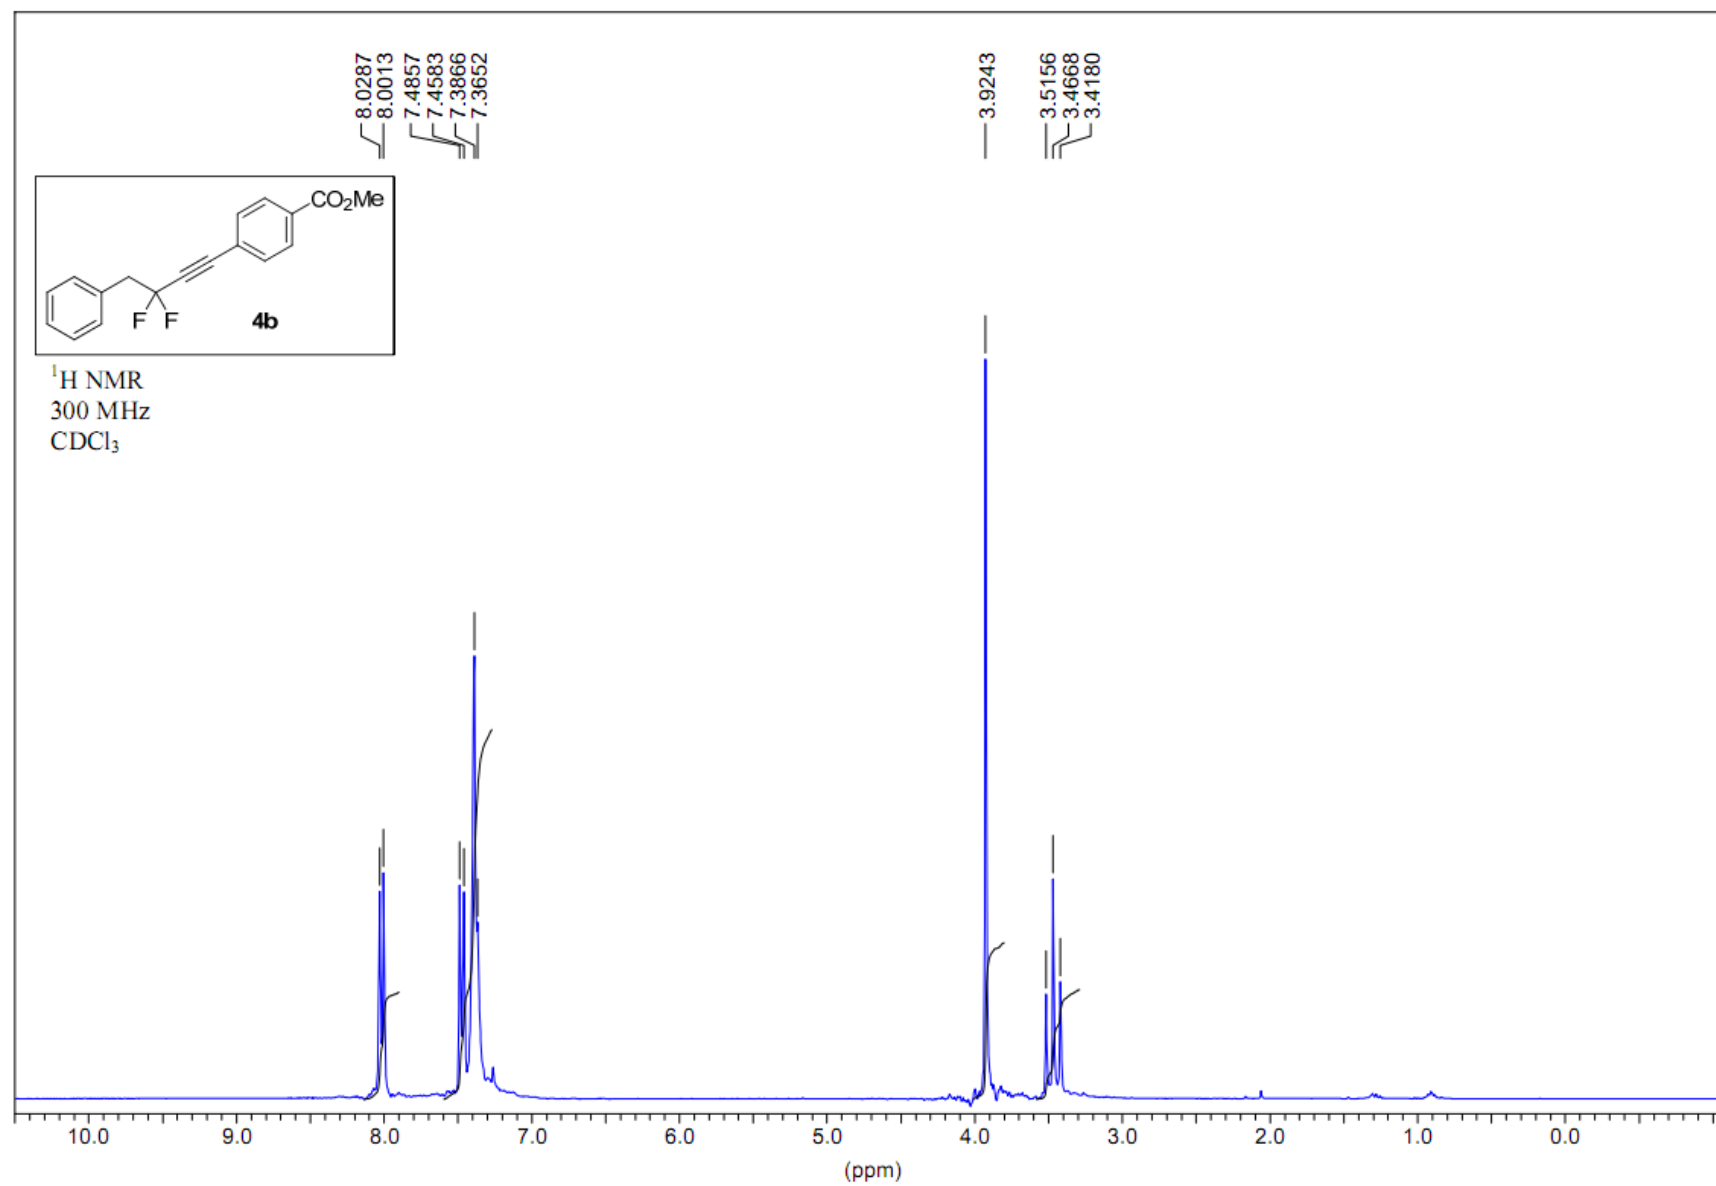

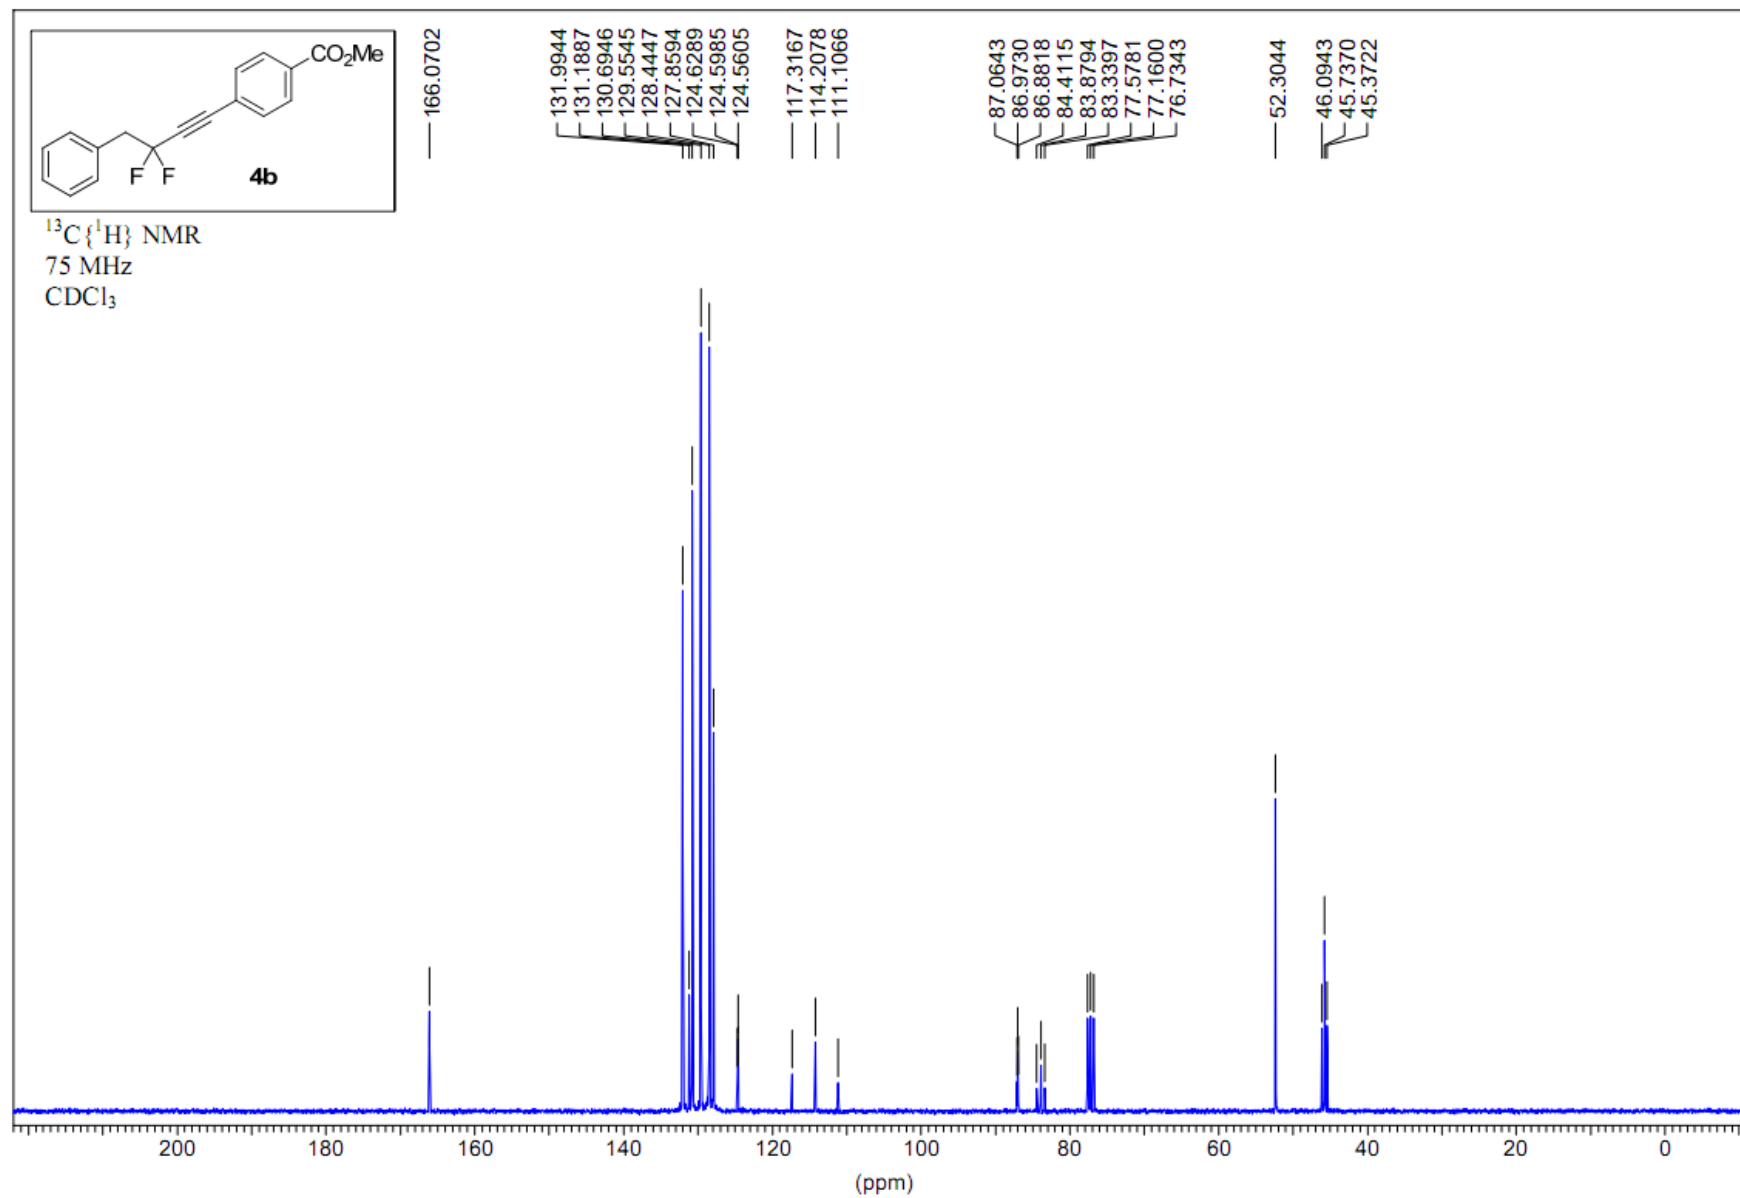

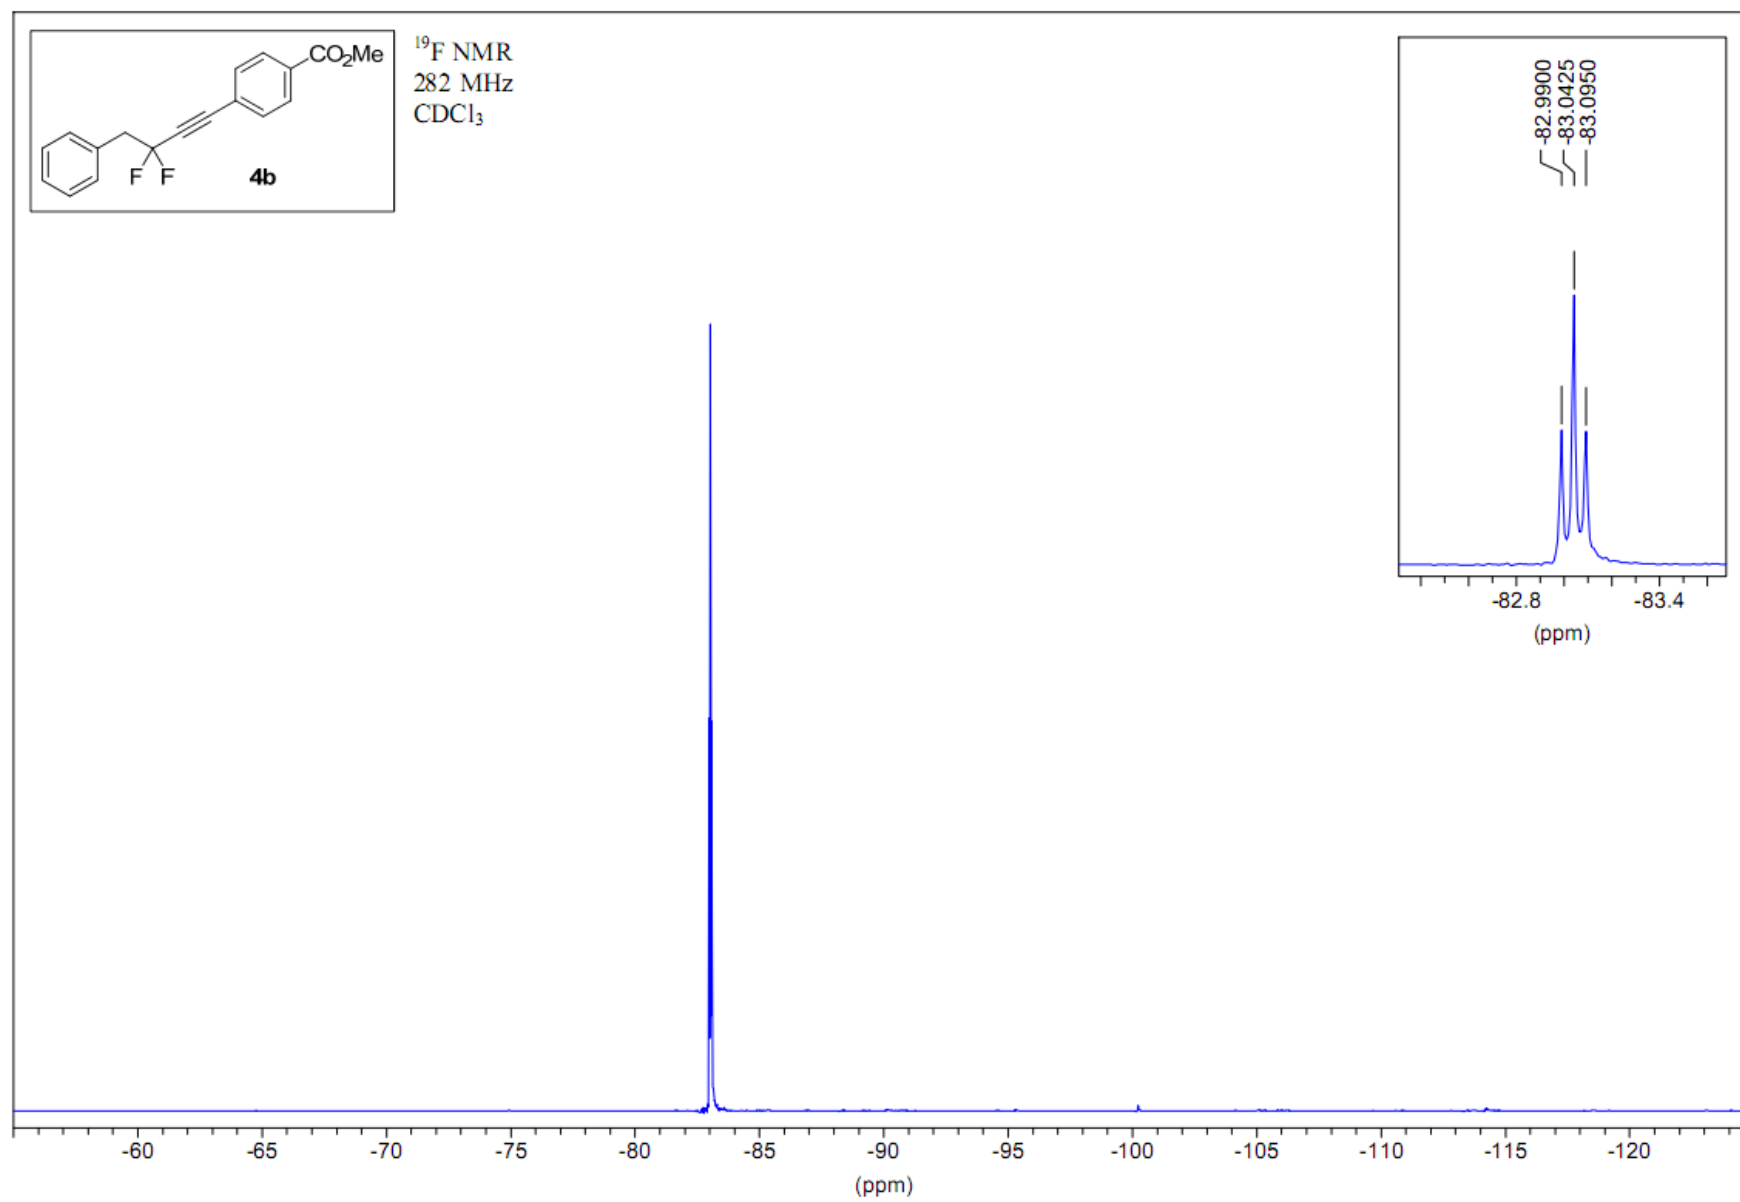

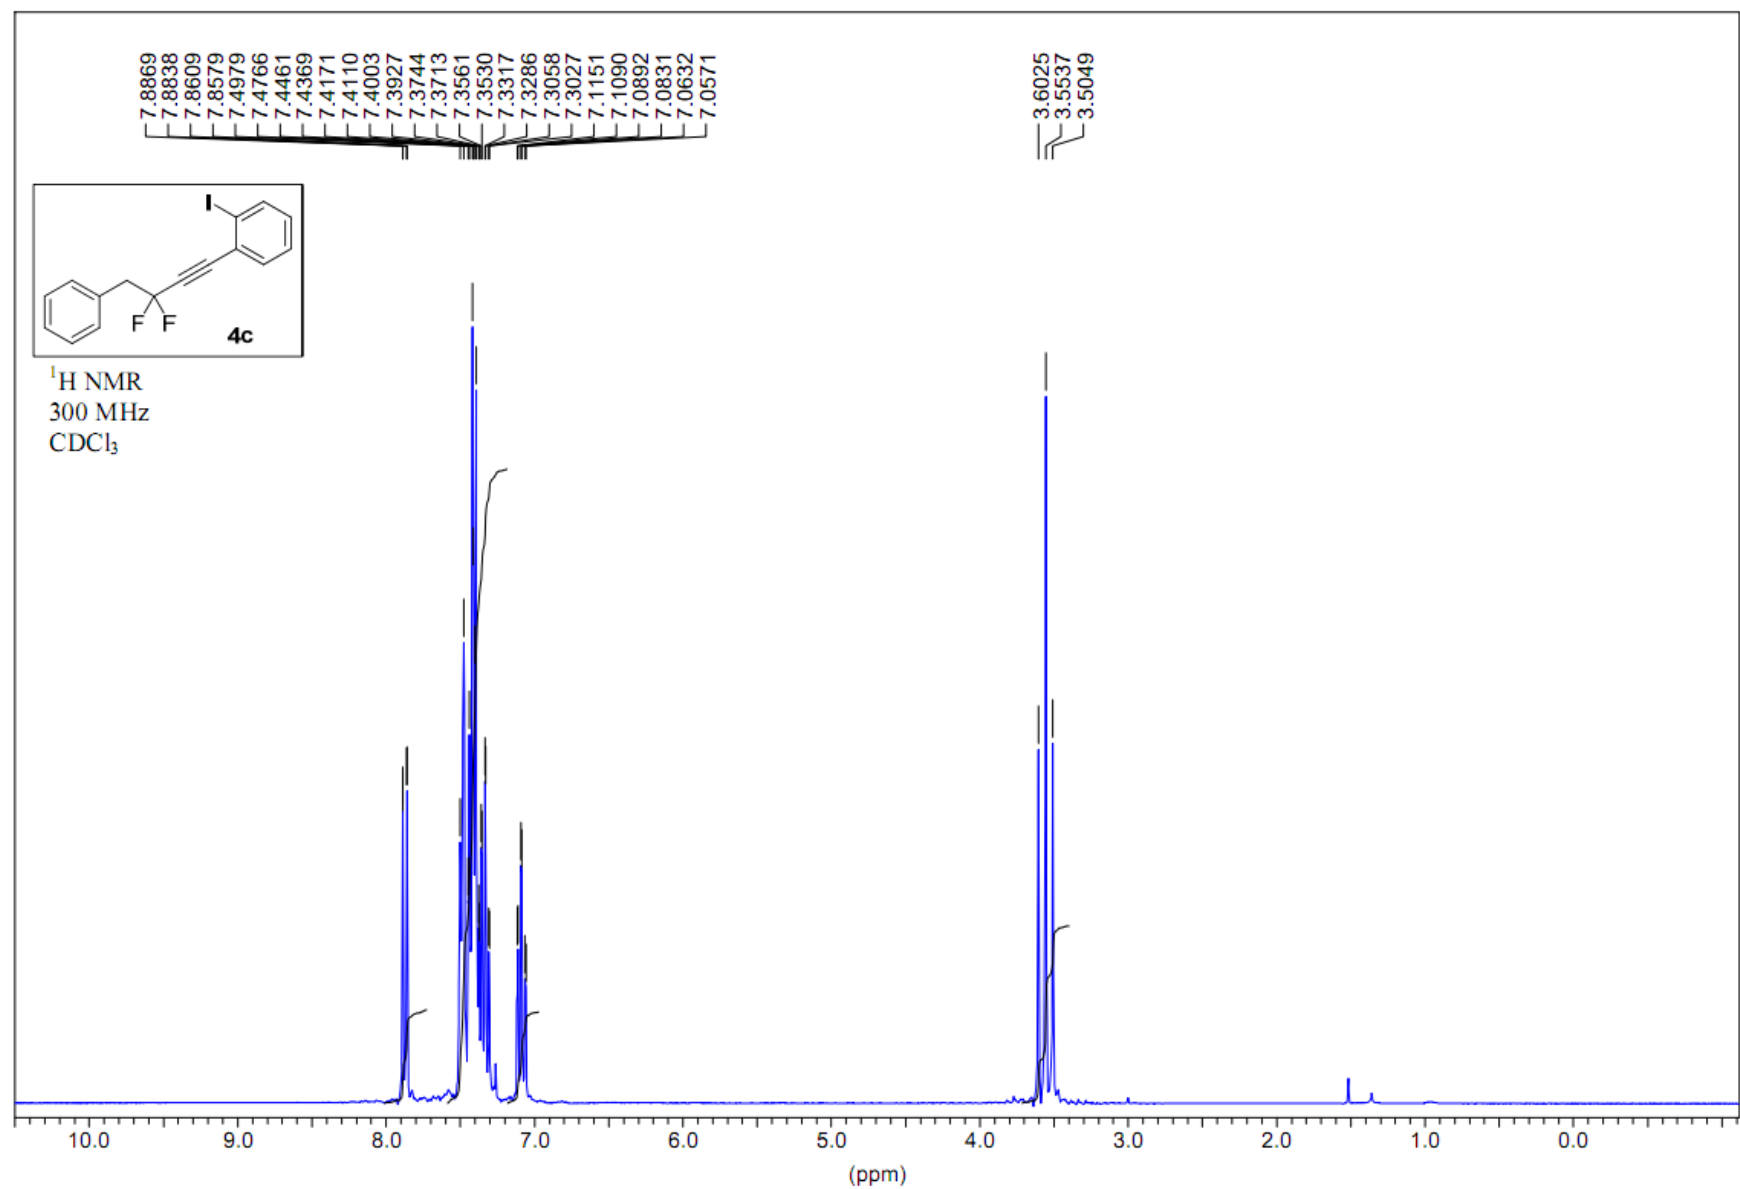

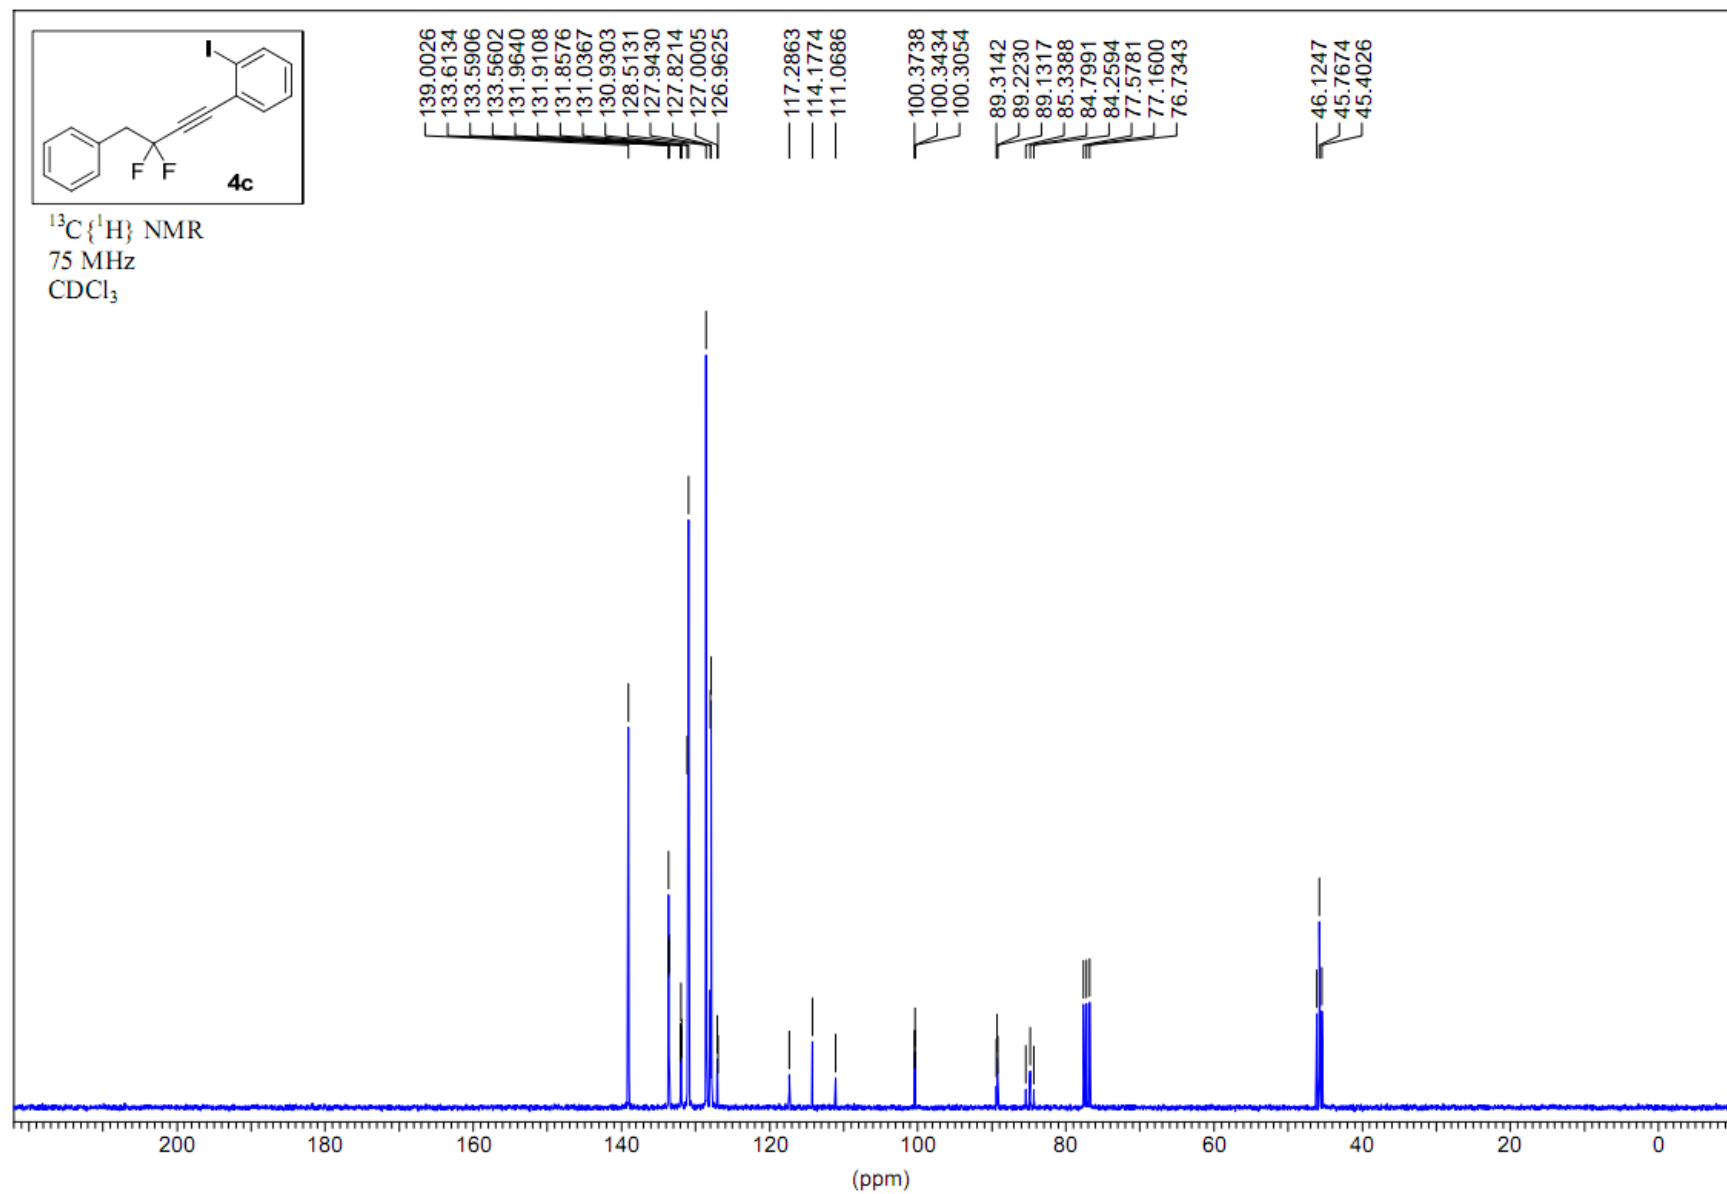

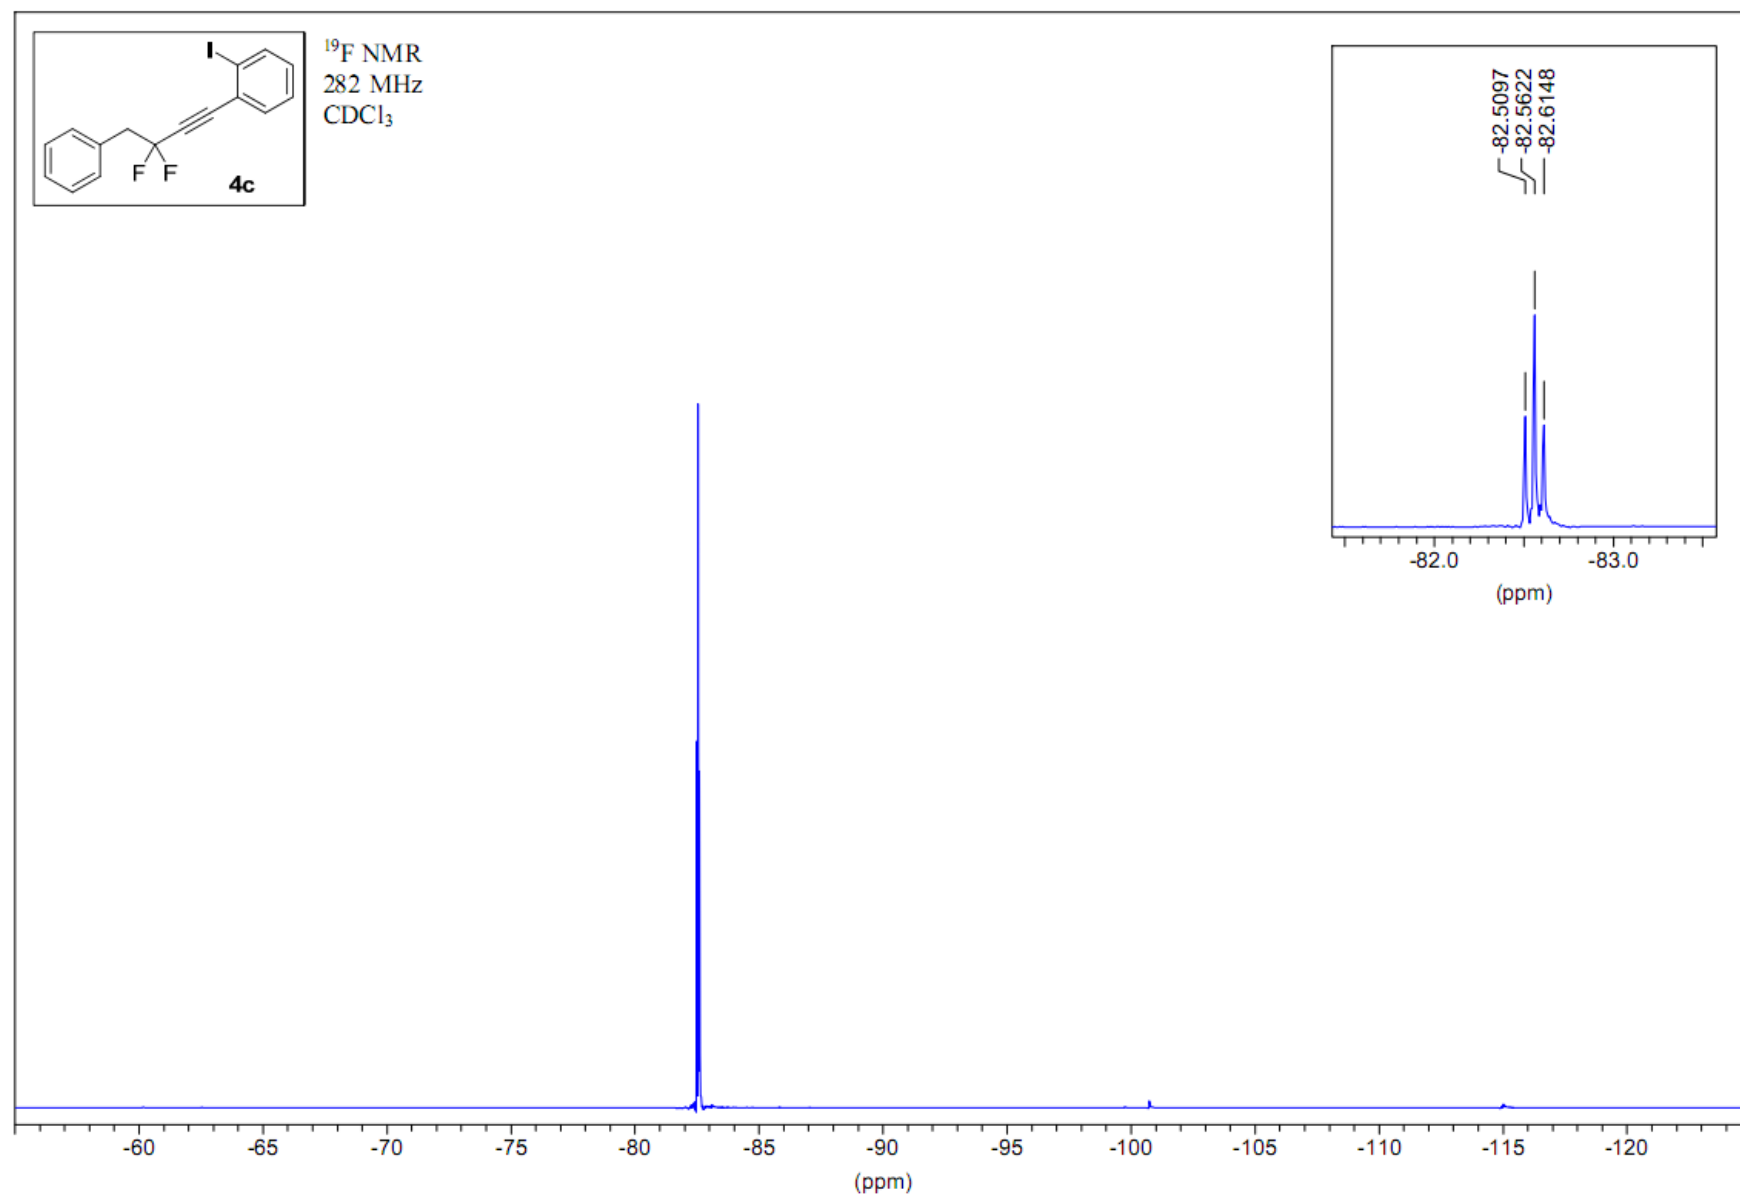



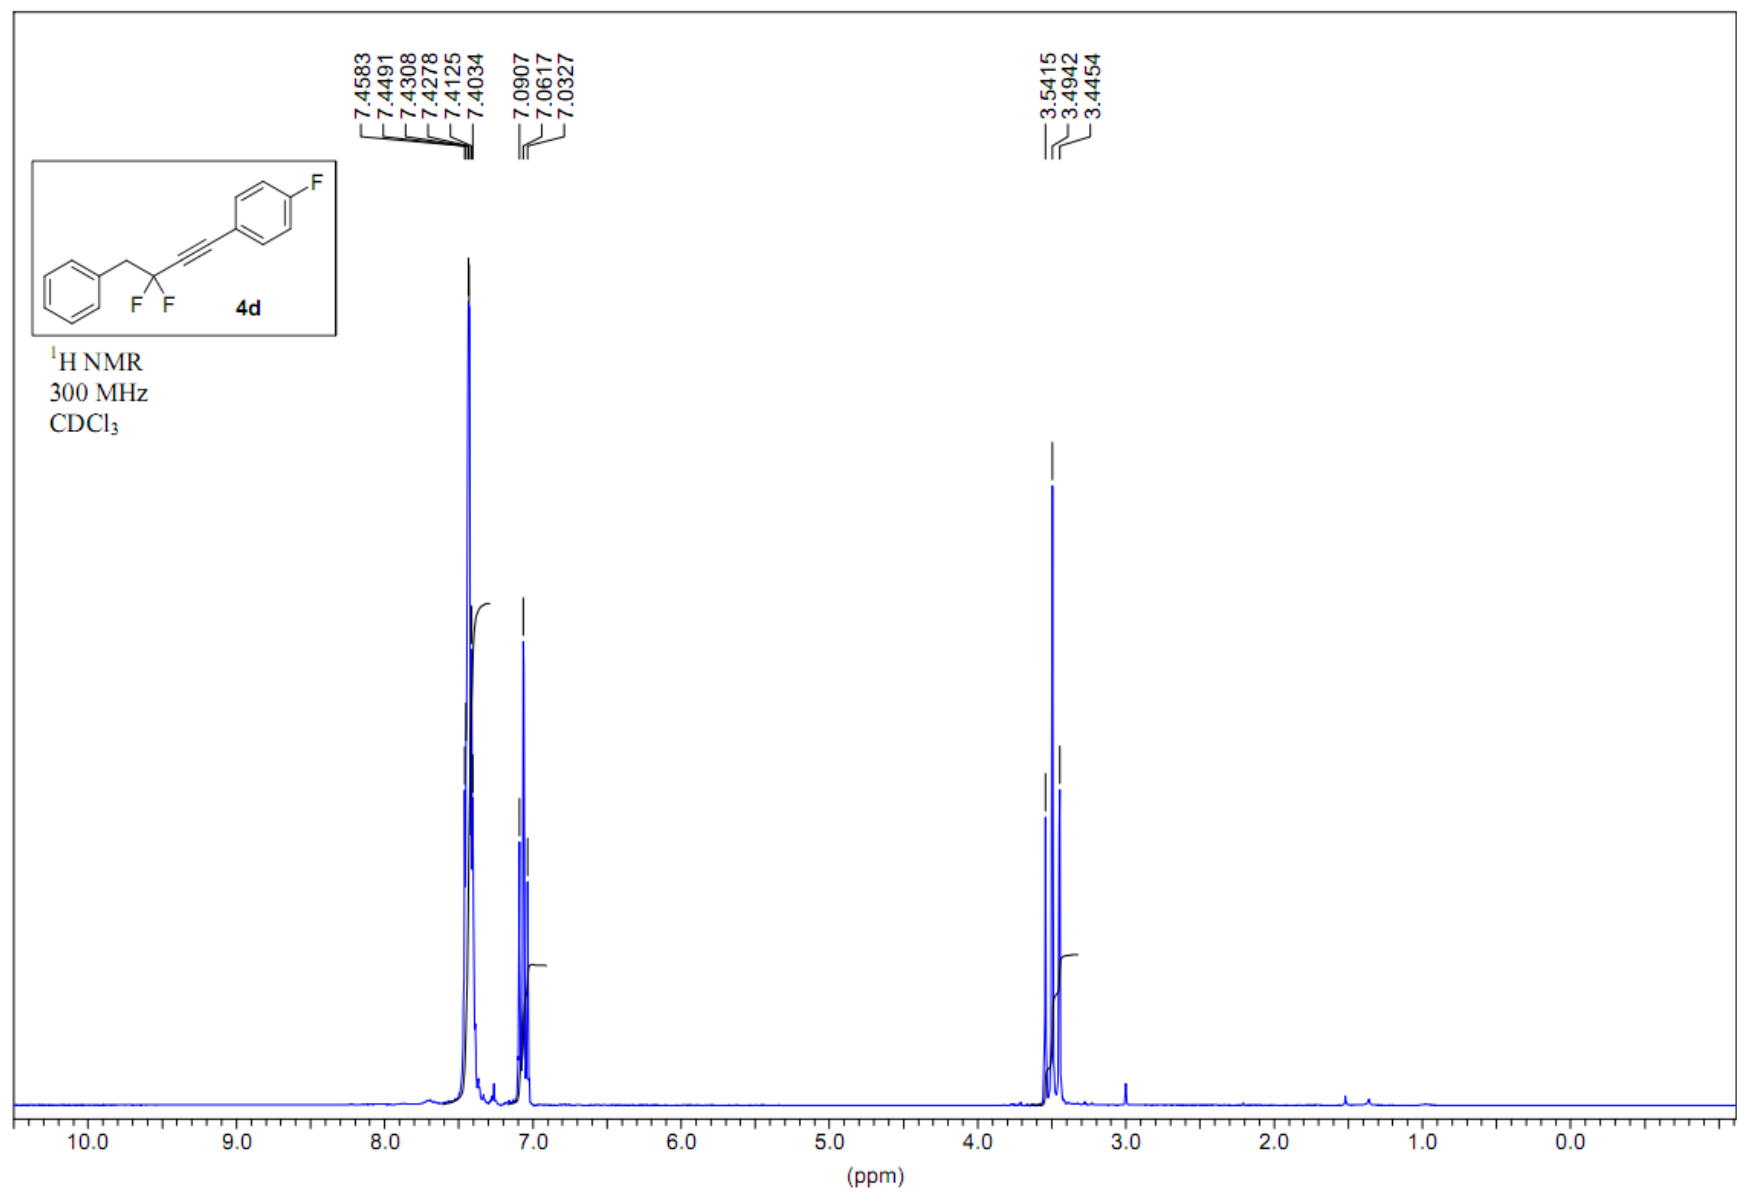

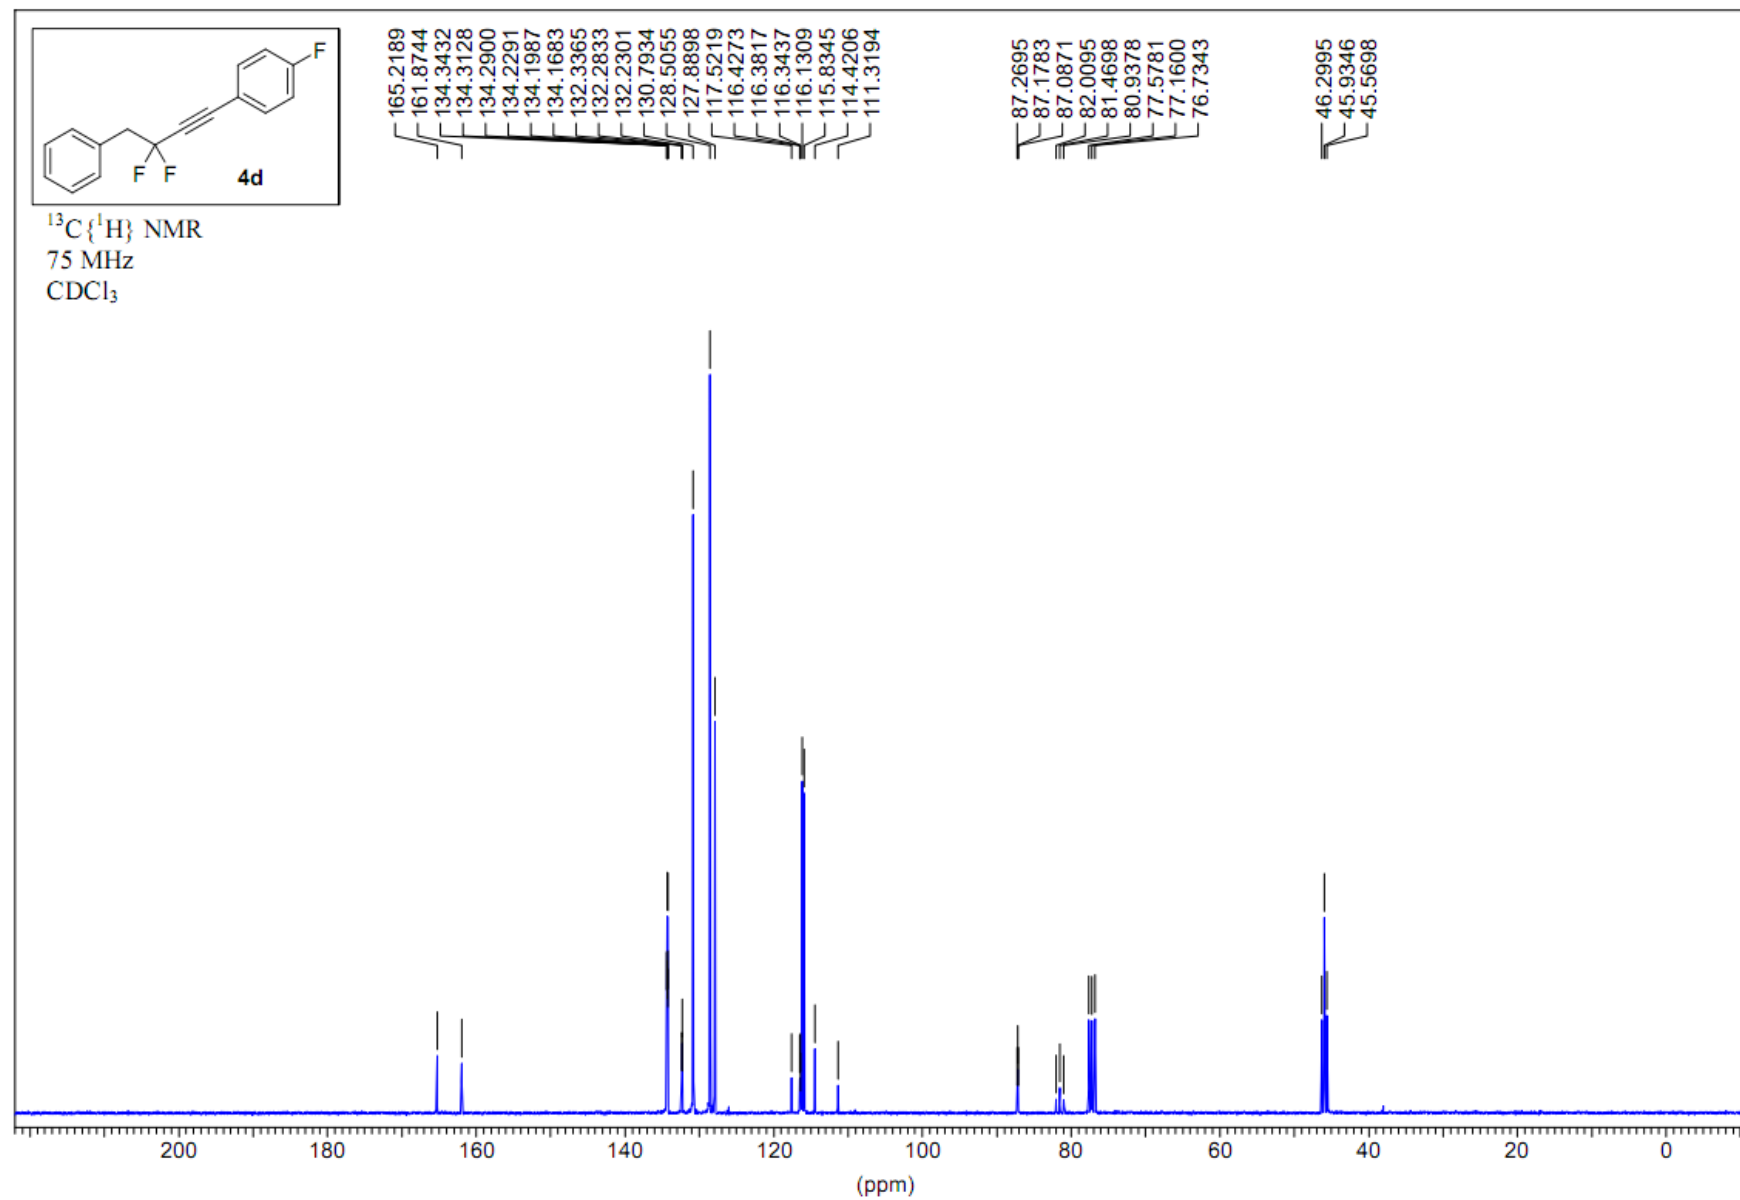

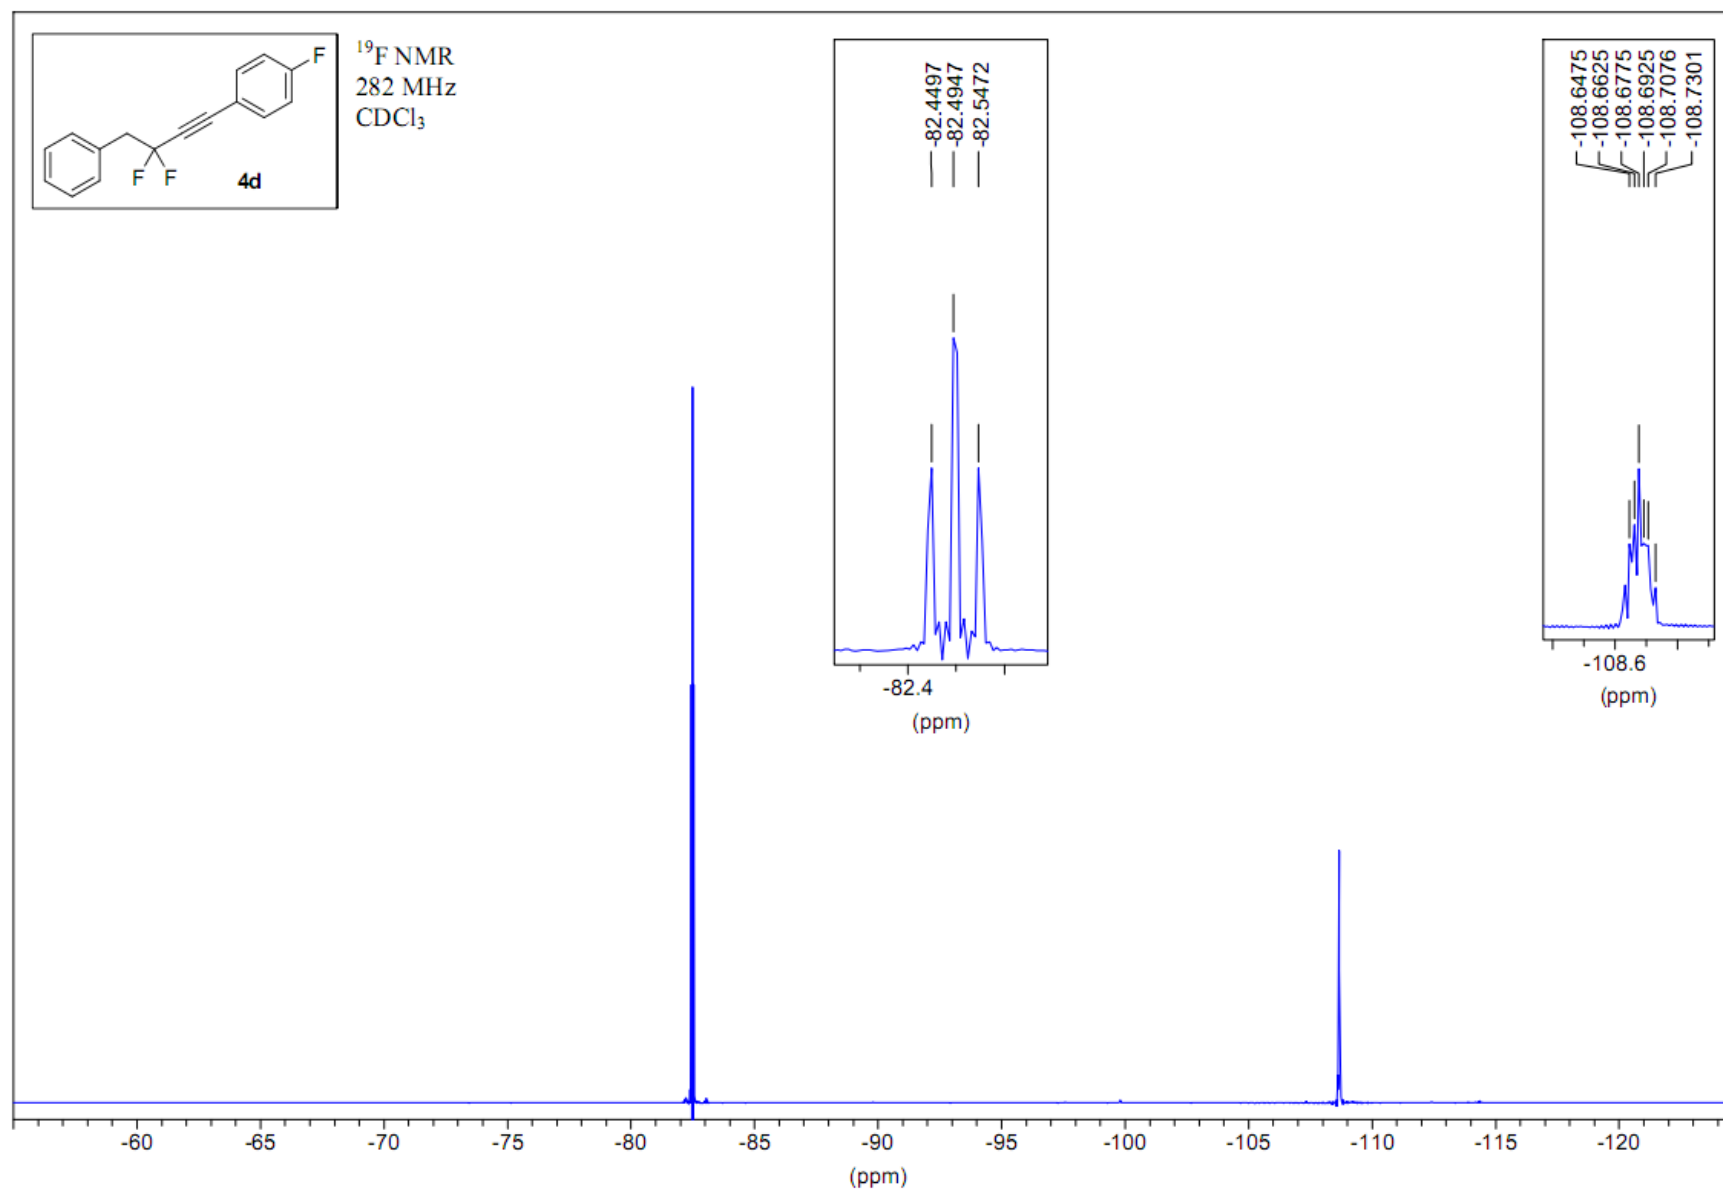

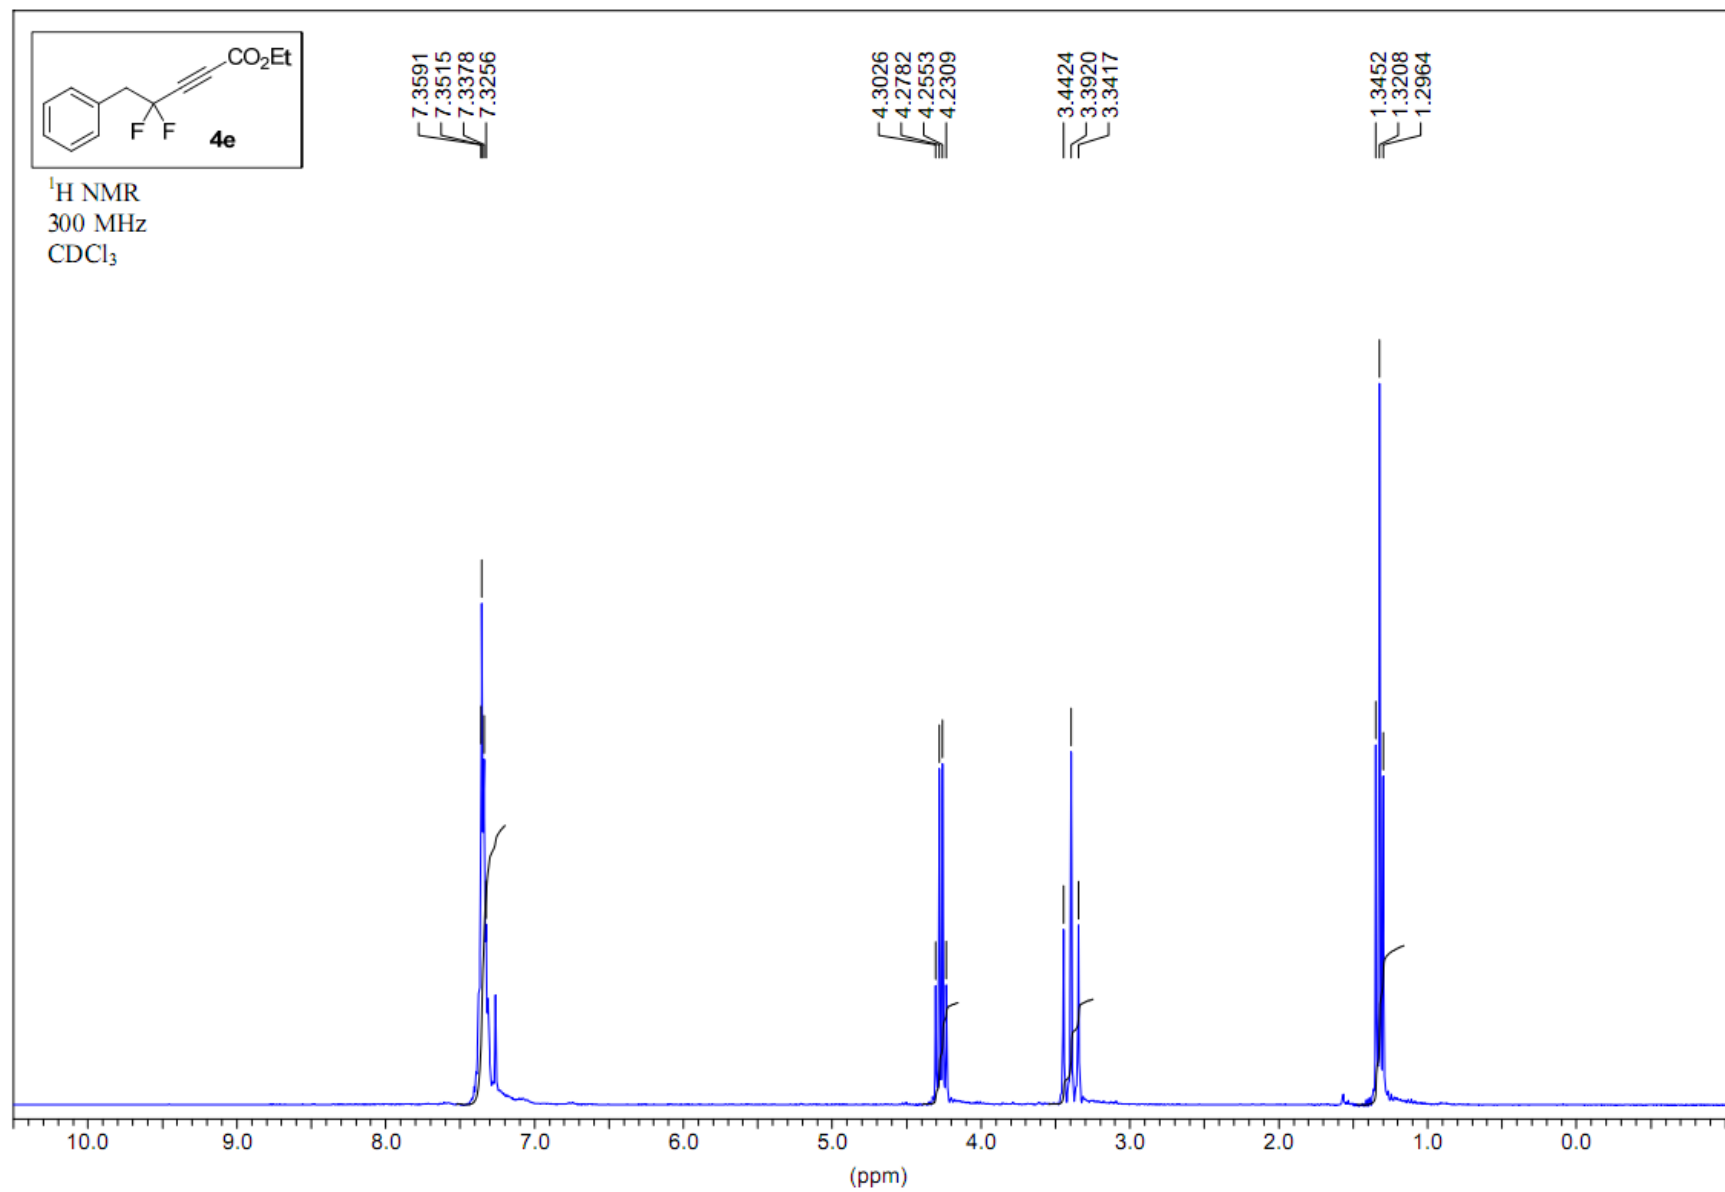

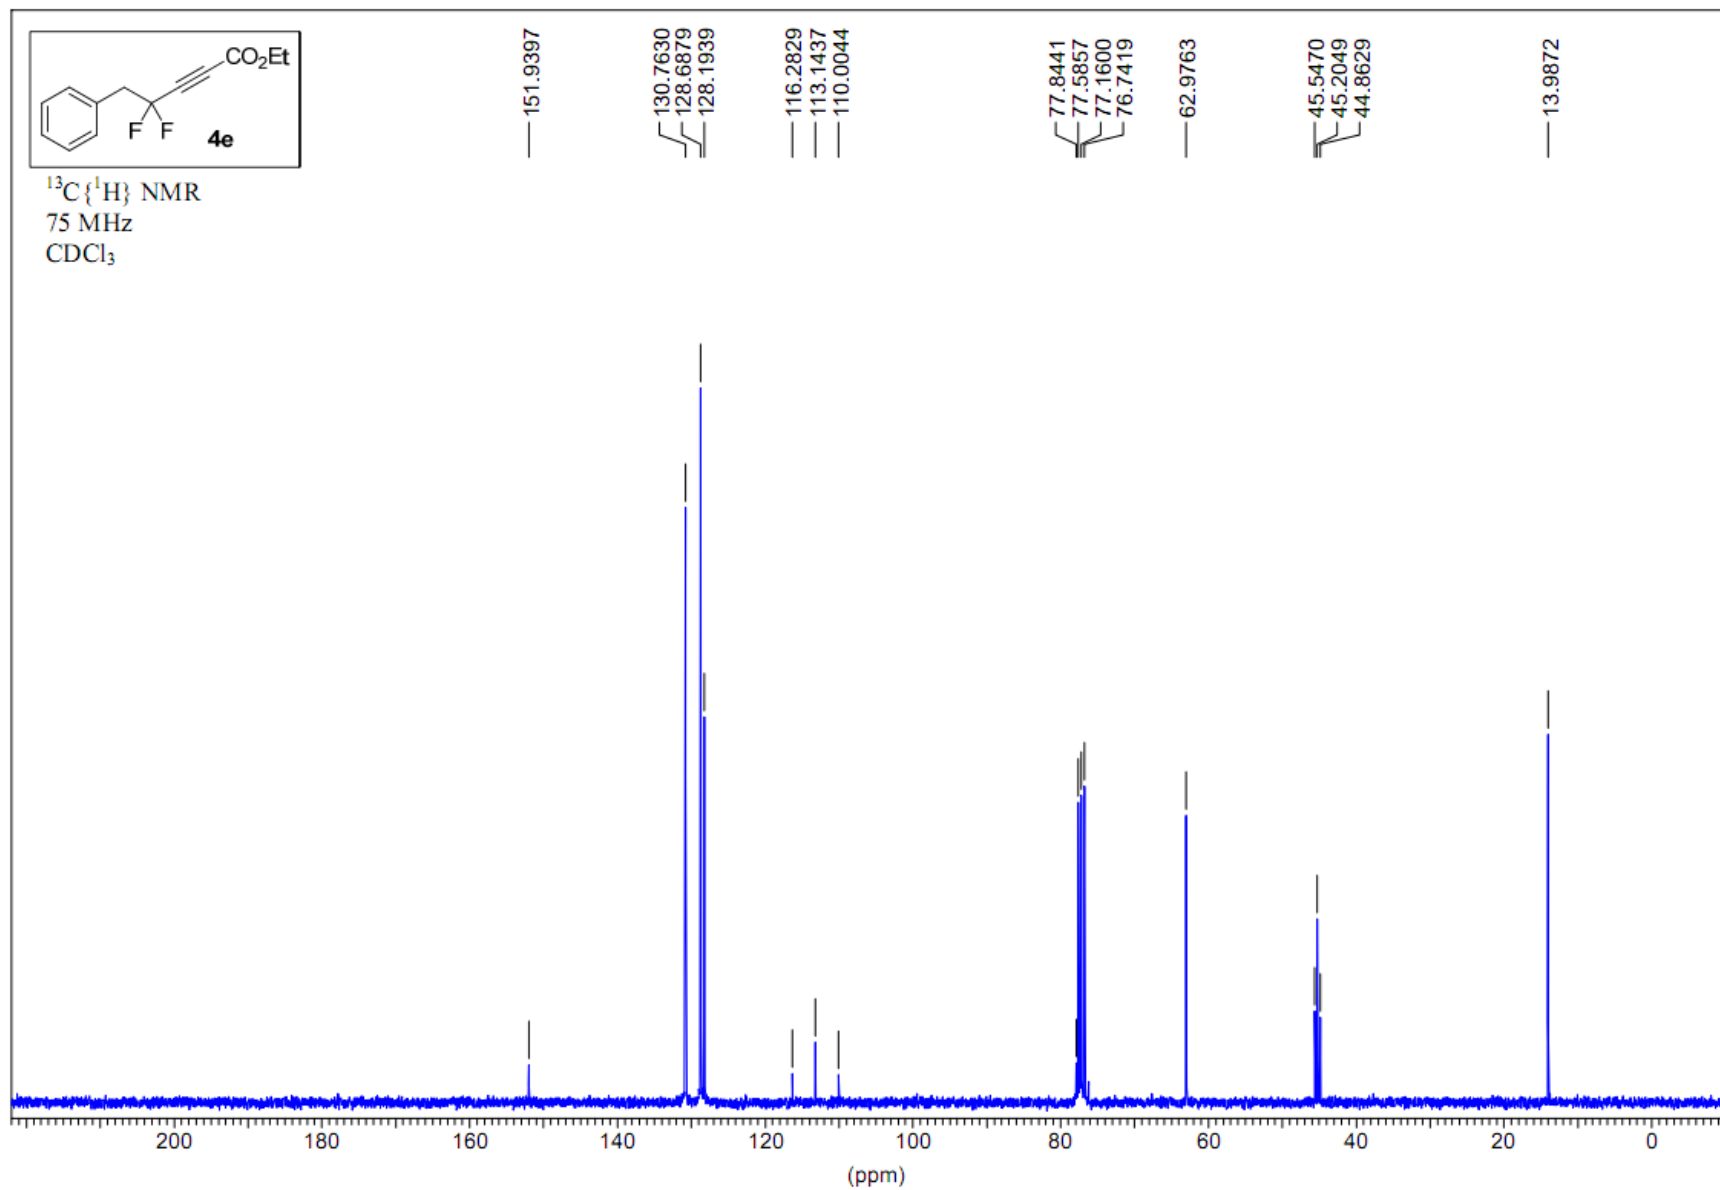

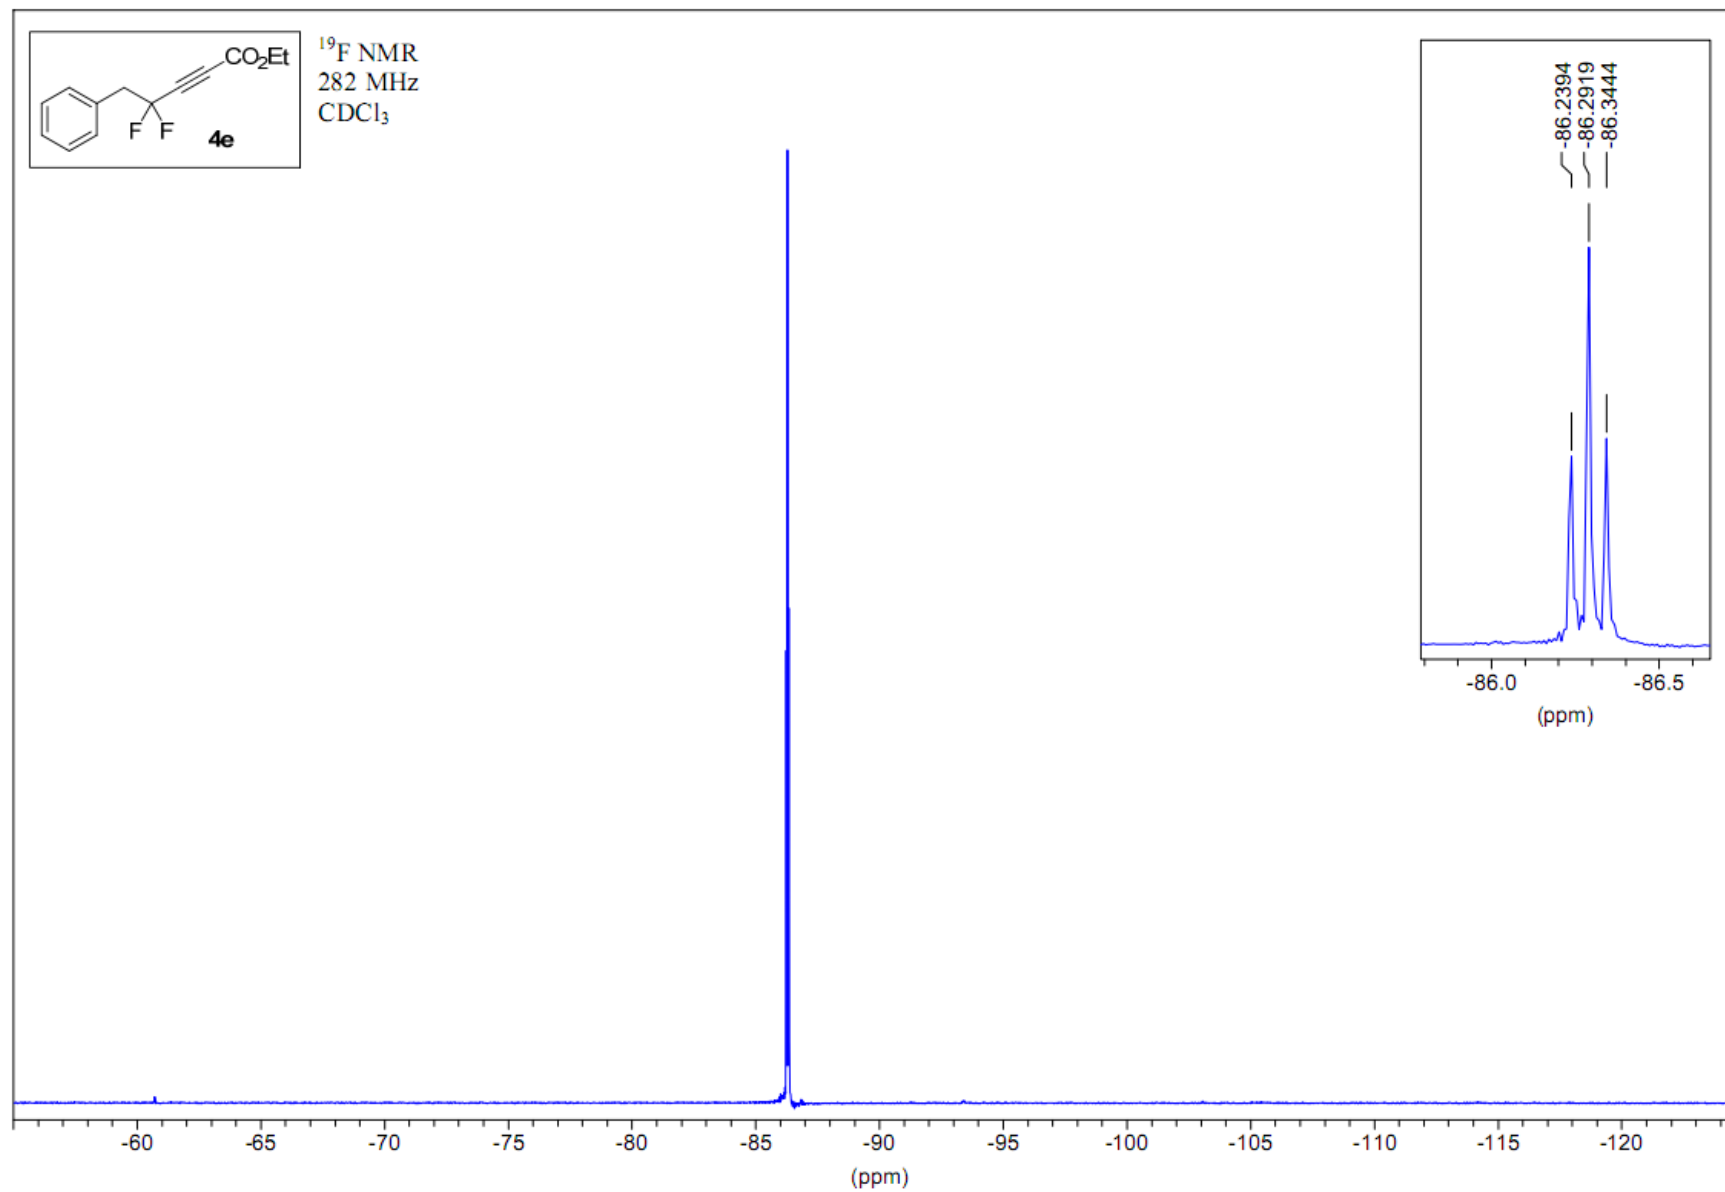

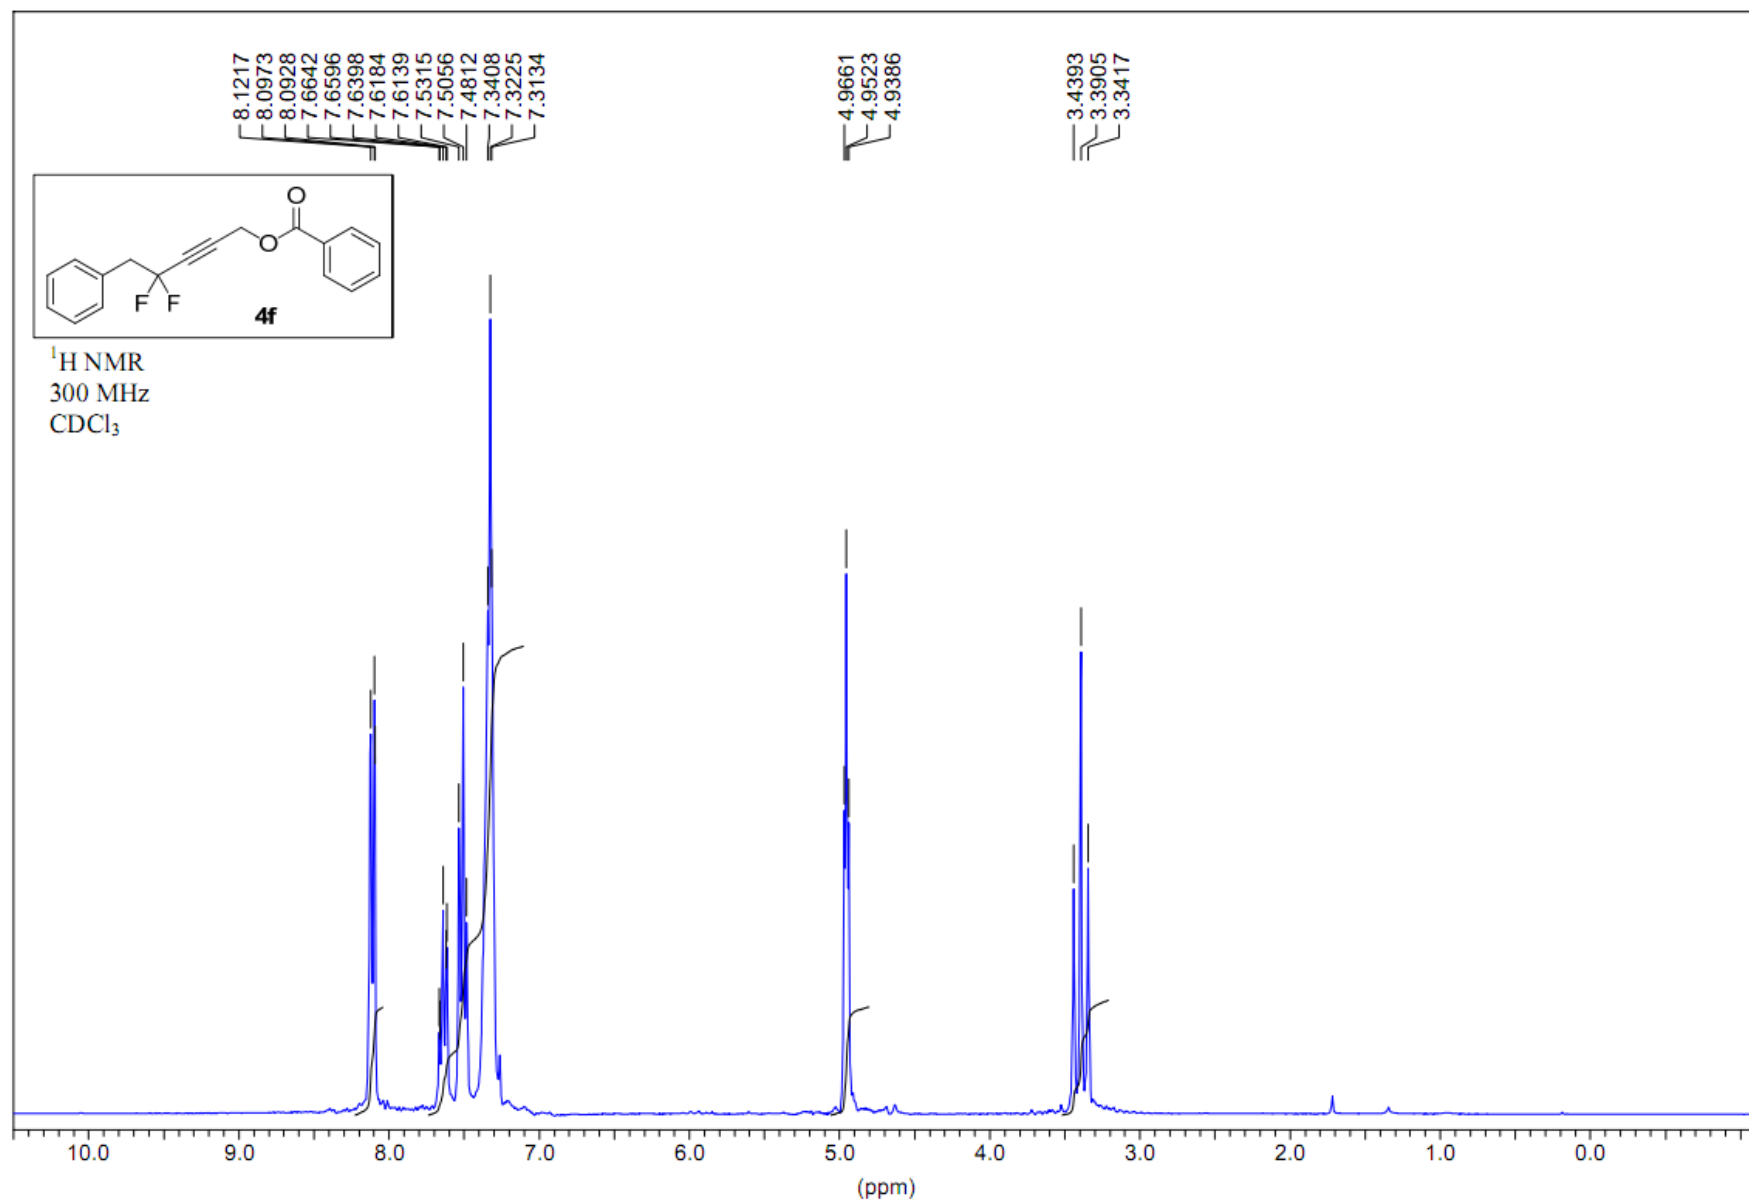

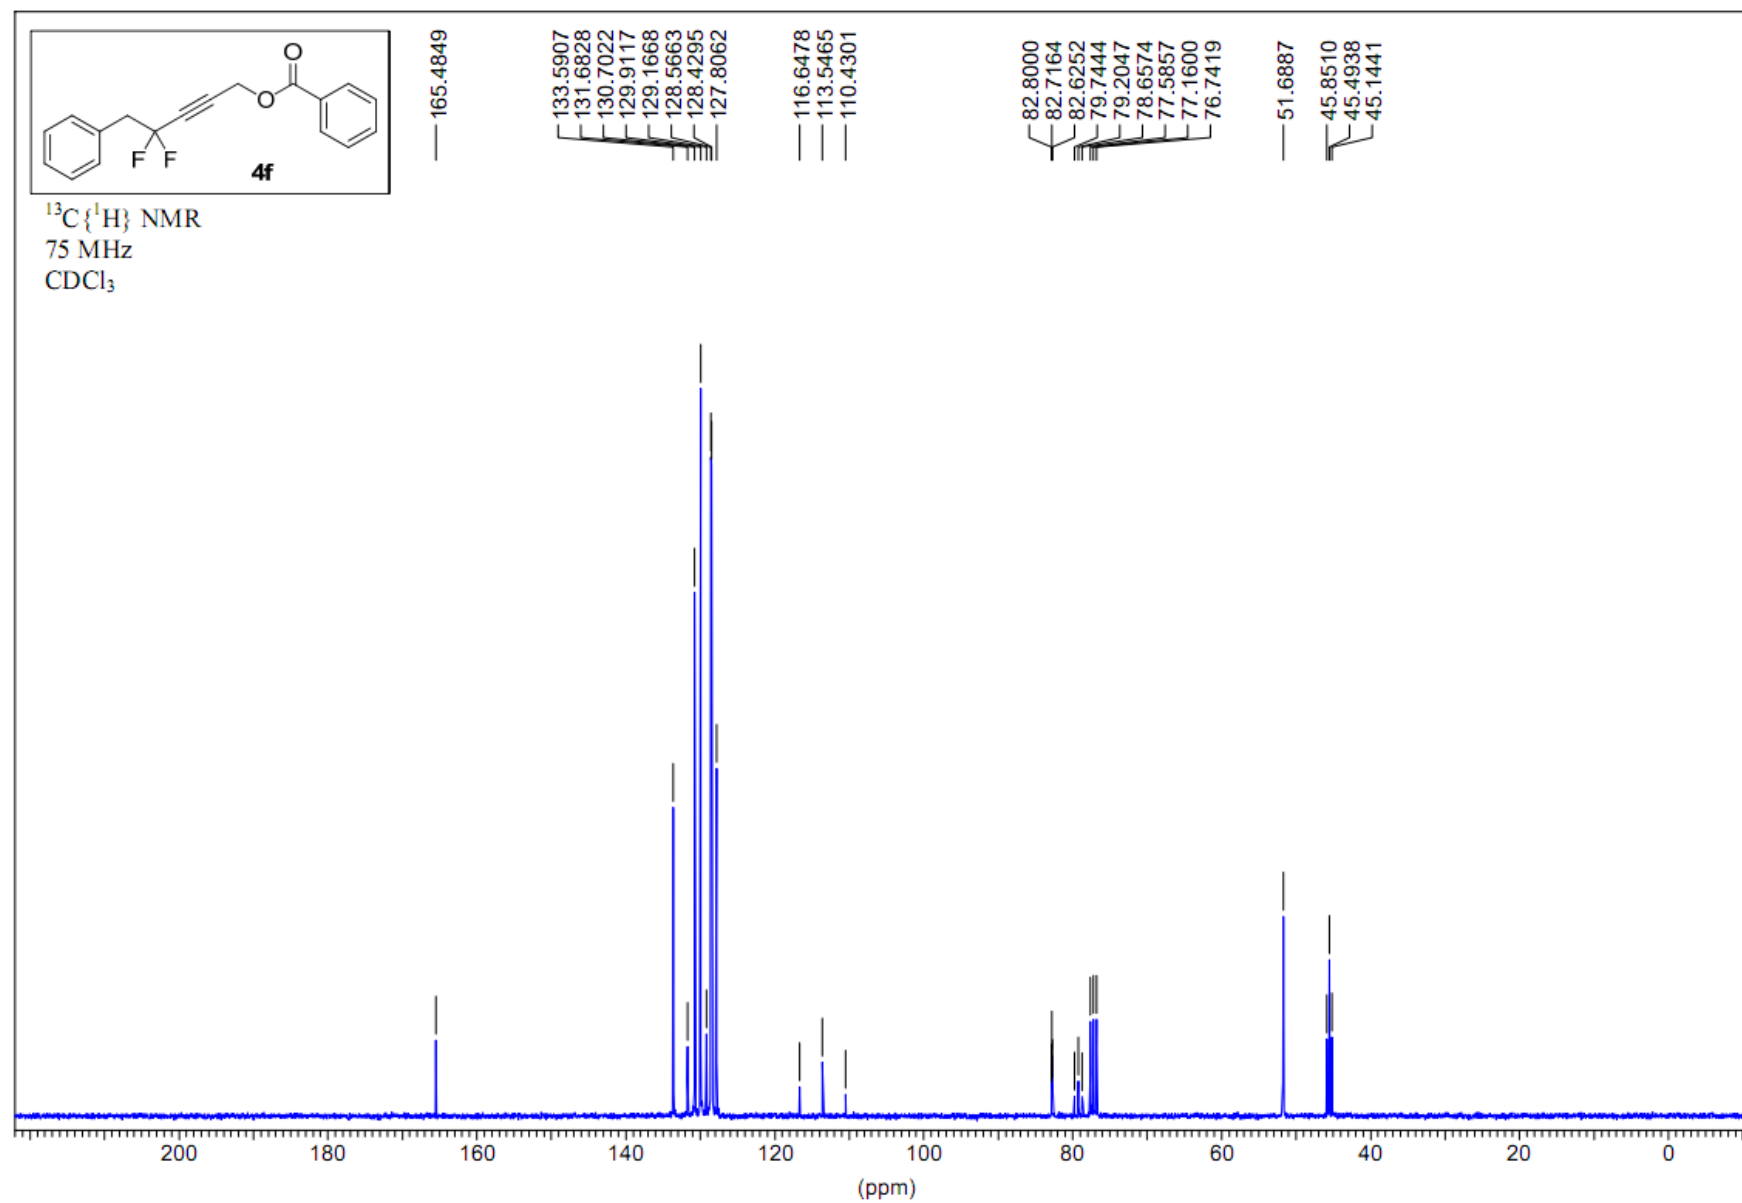



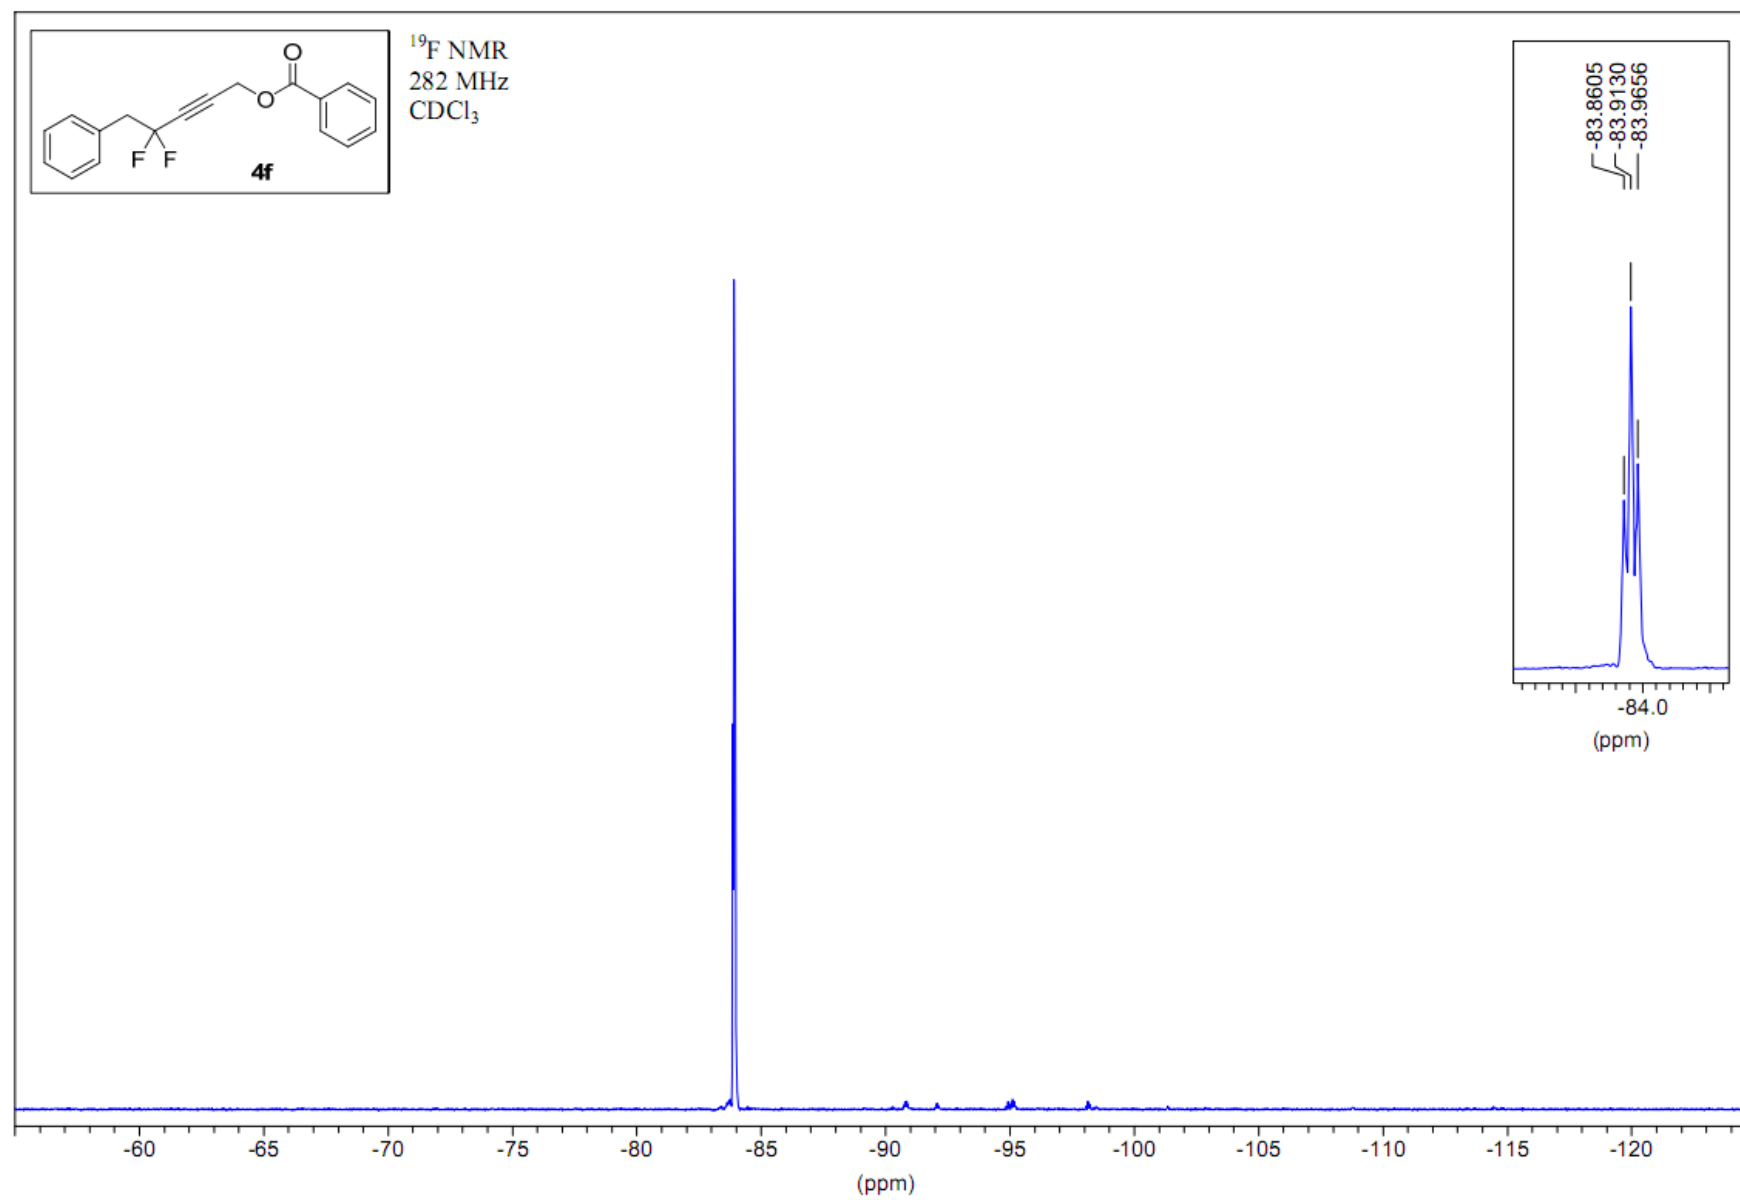

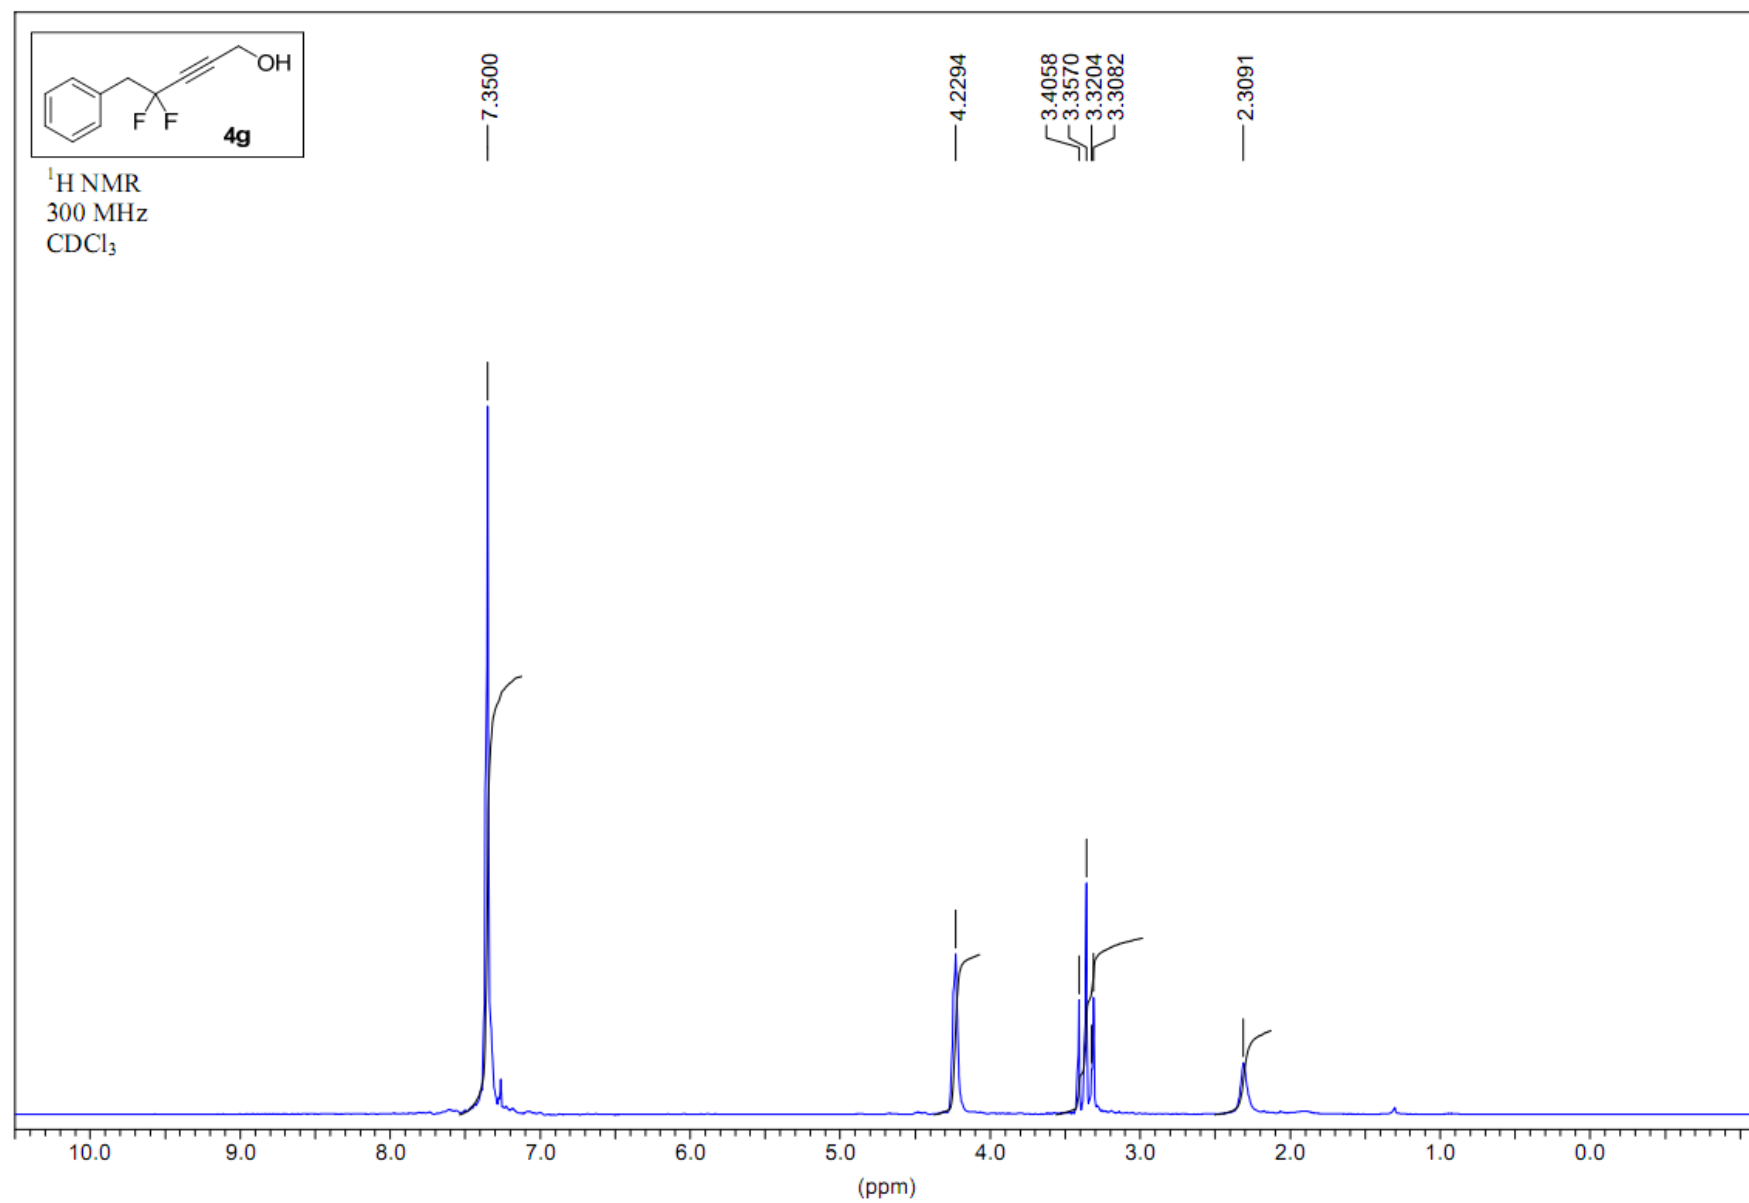

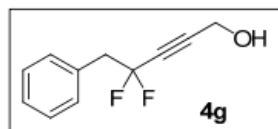

$^{13}\text{C}\{^1\text{H}\}$  NMR  
75 MHz  
 $\text{CDCl}_3$

132.0020  
131.9488  
131.8956  
130.7402  
128.5055  
127.8898

116.7466  
113.6453  
110.5441

86.6766  
86.5854  
86.5018

78.9843  
78.4446  
77.9125

50.4877  
50.4649  
50.4345  
45.9194  
45.5622  
45.2049

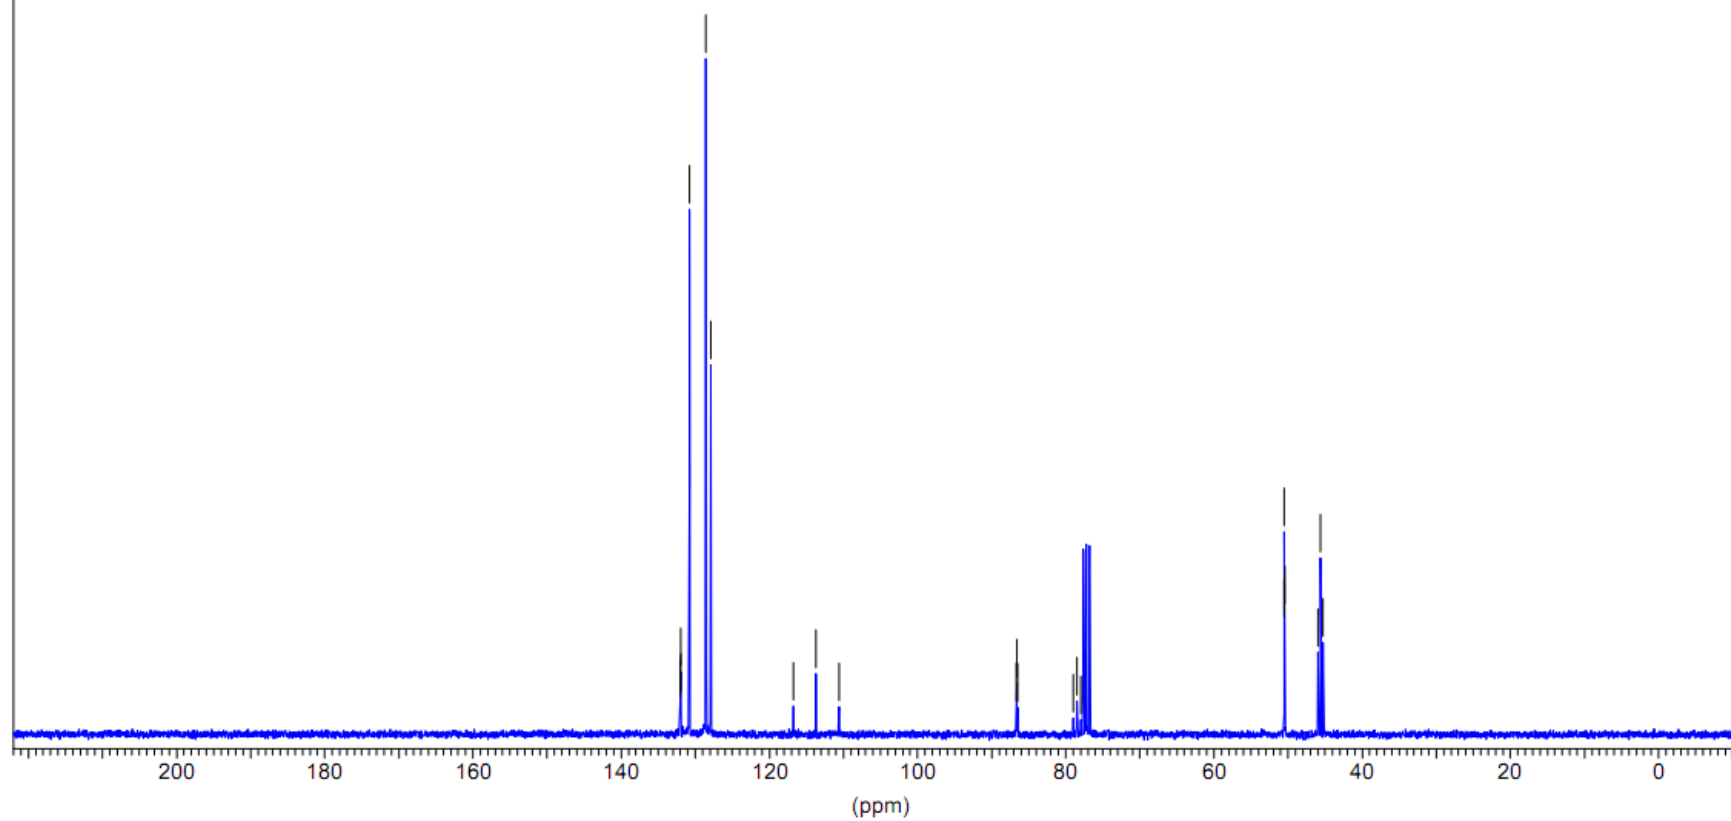

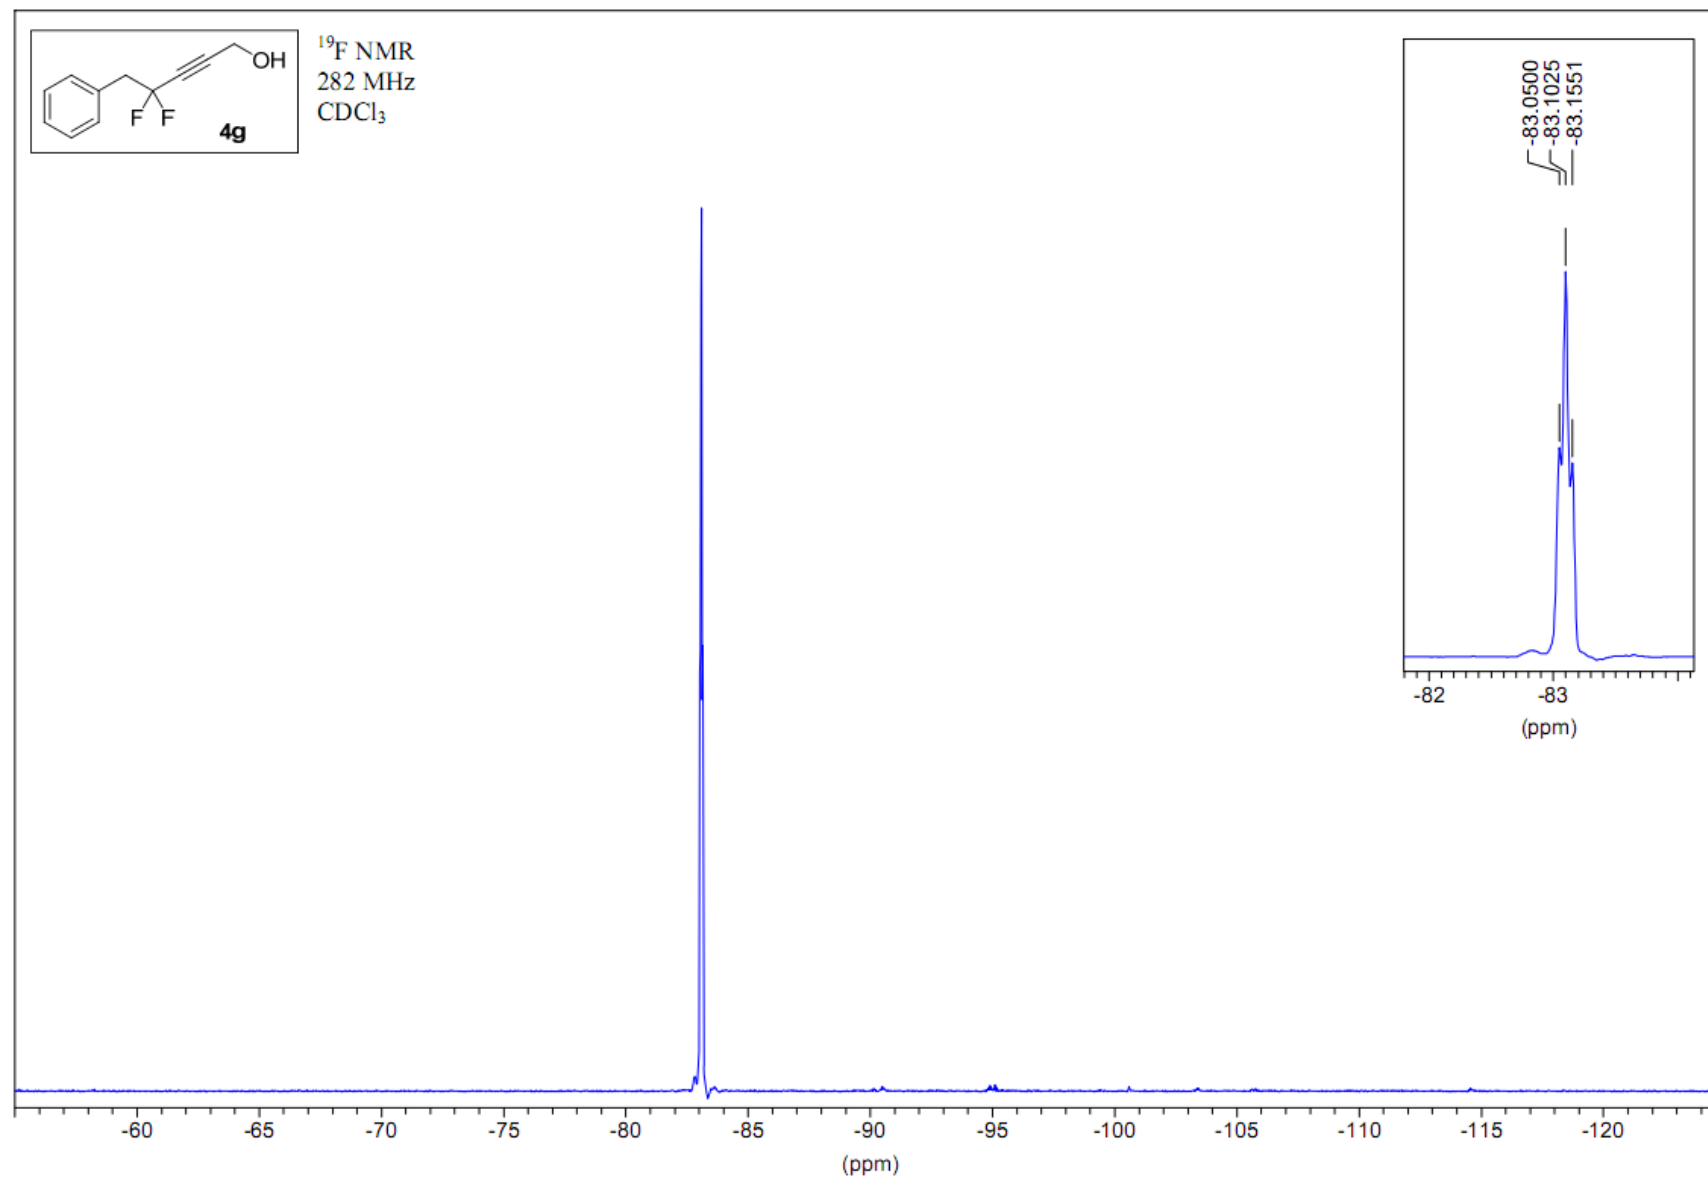

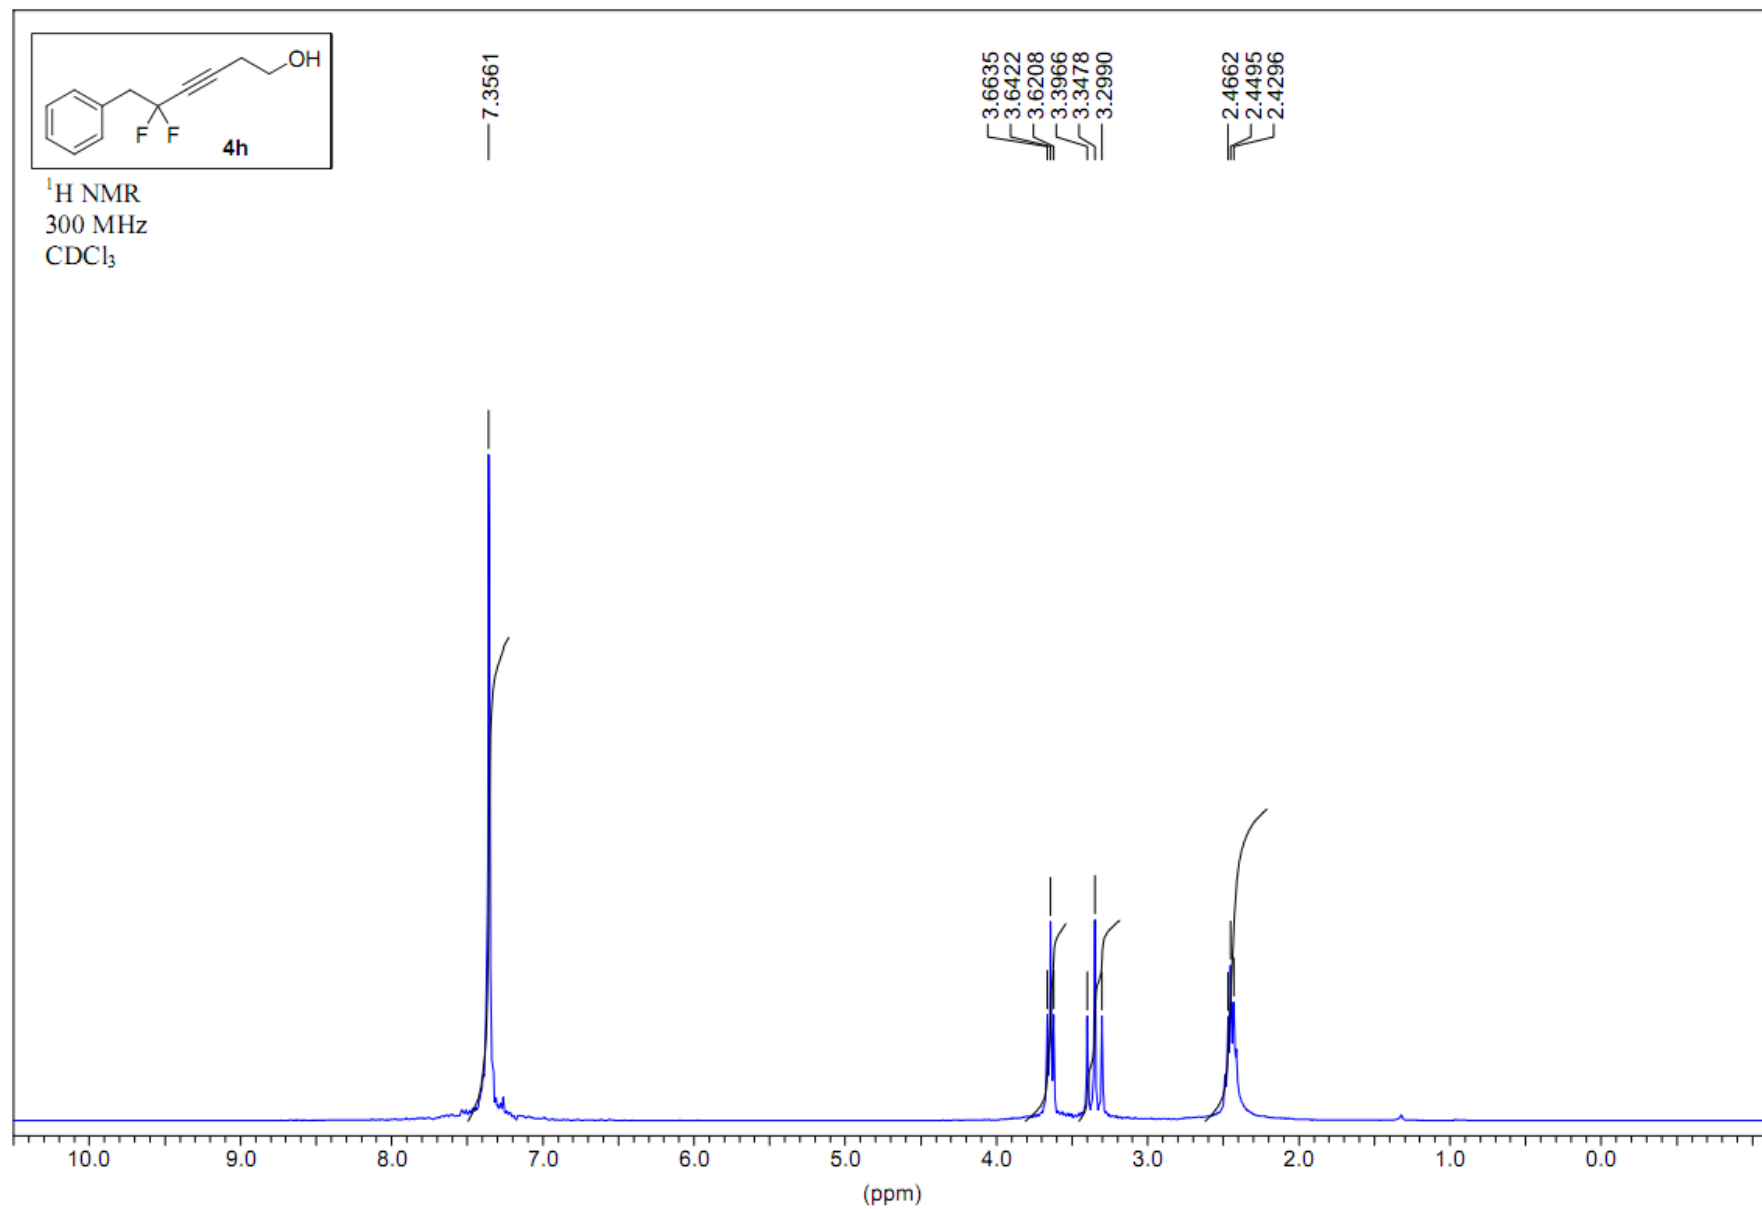

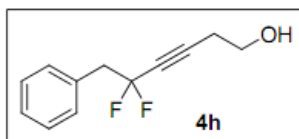

$^{13}\text{C}\{^1\text{H}\}$  NMR  
75 MHz  
 $\text{CDCl}_3$

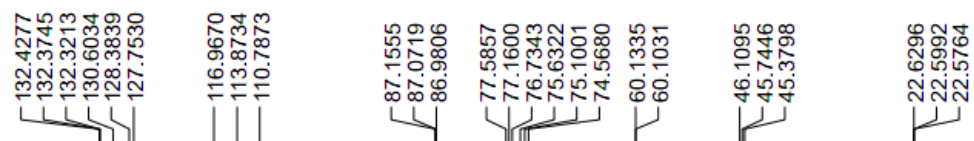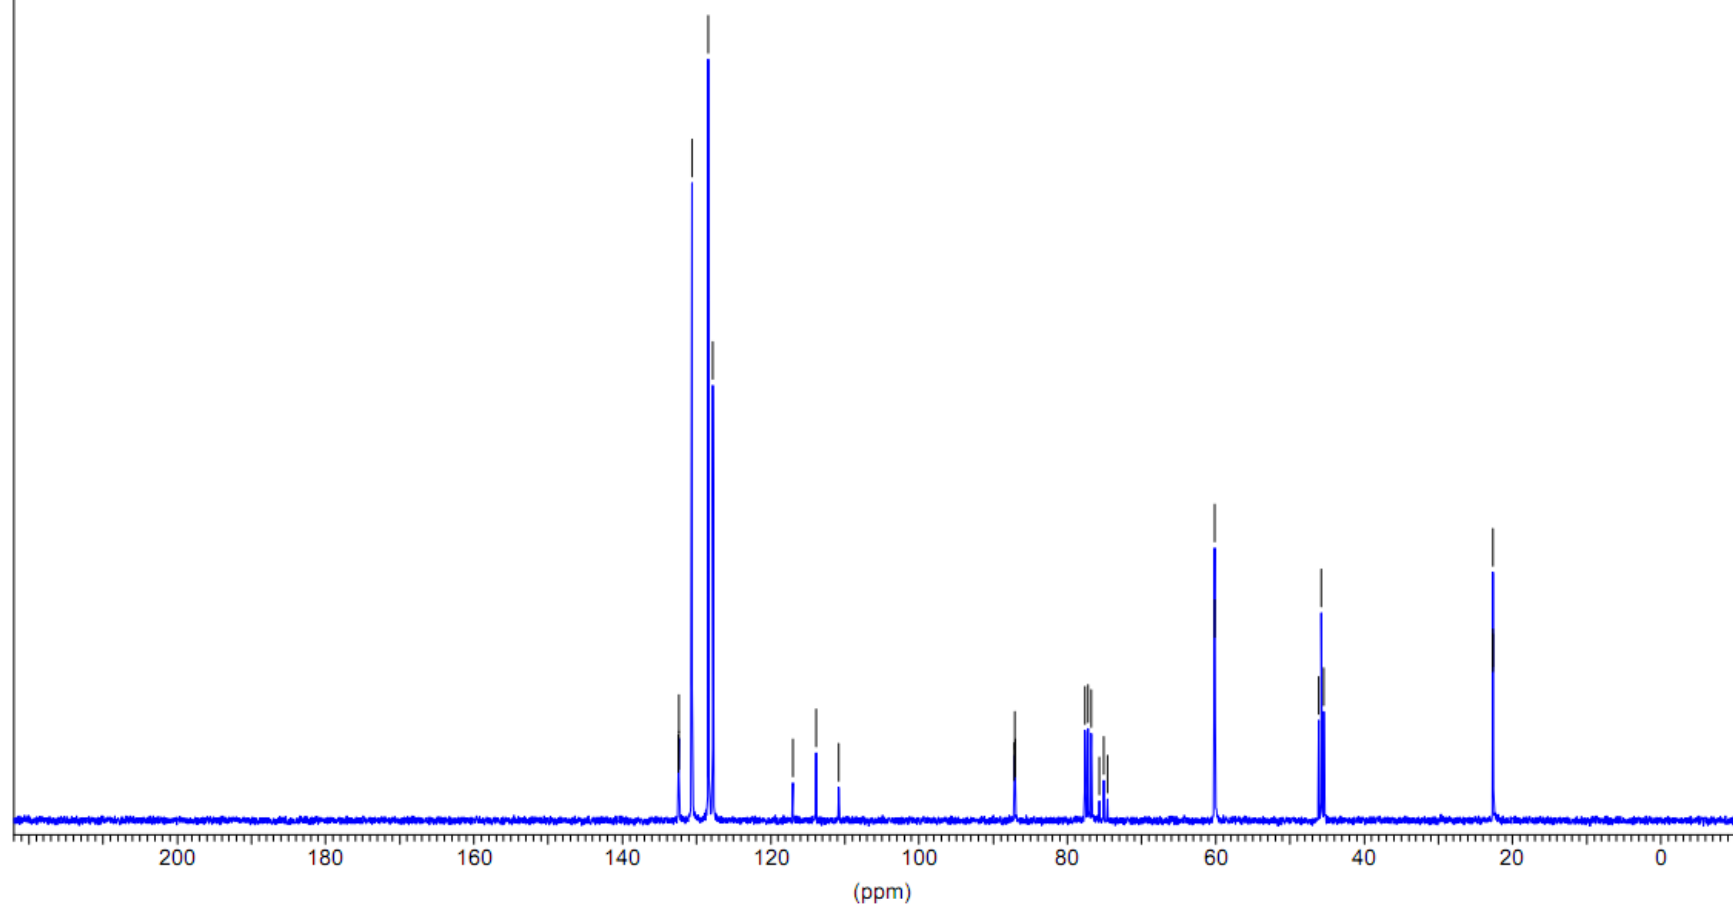

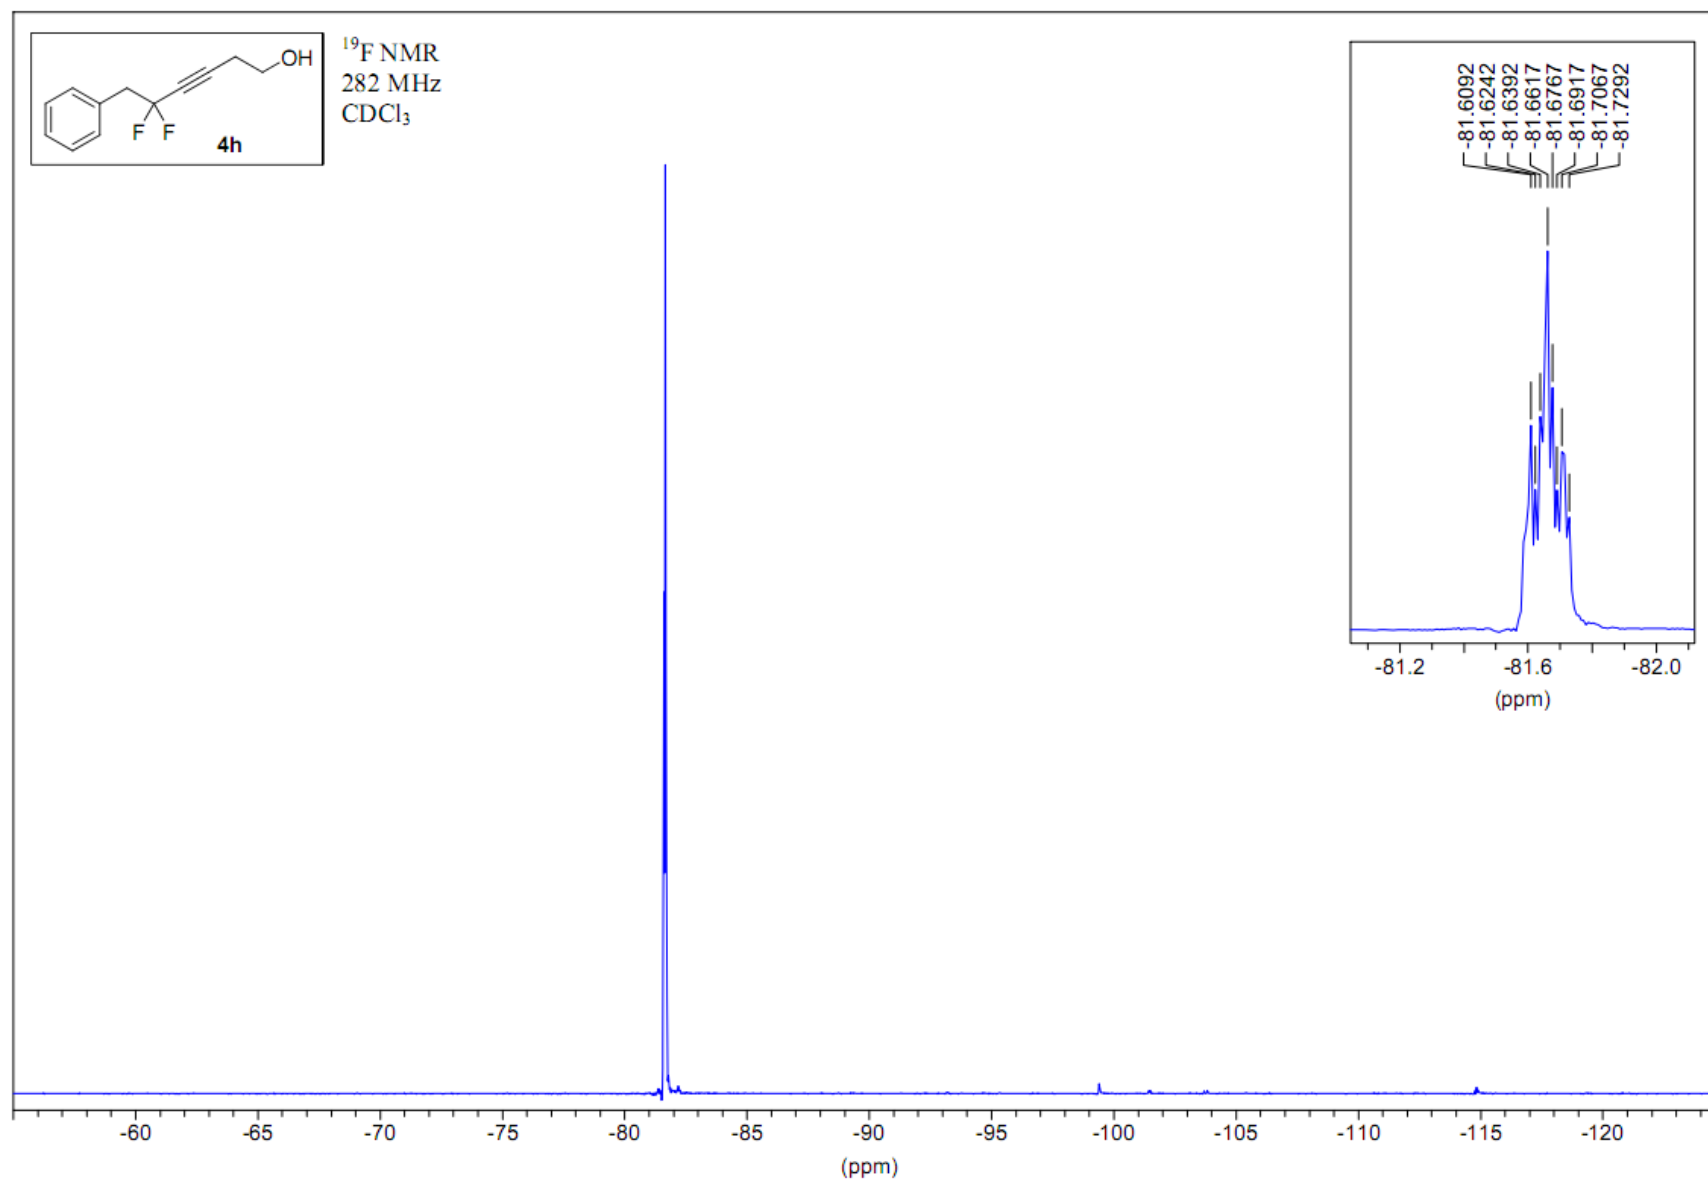

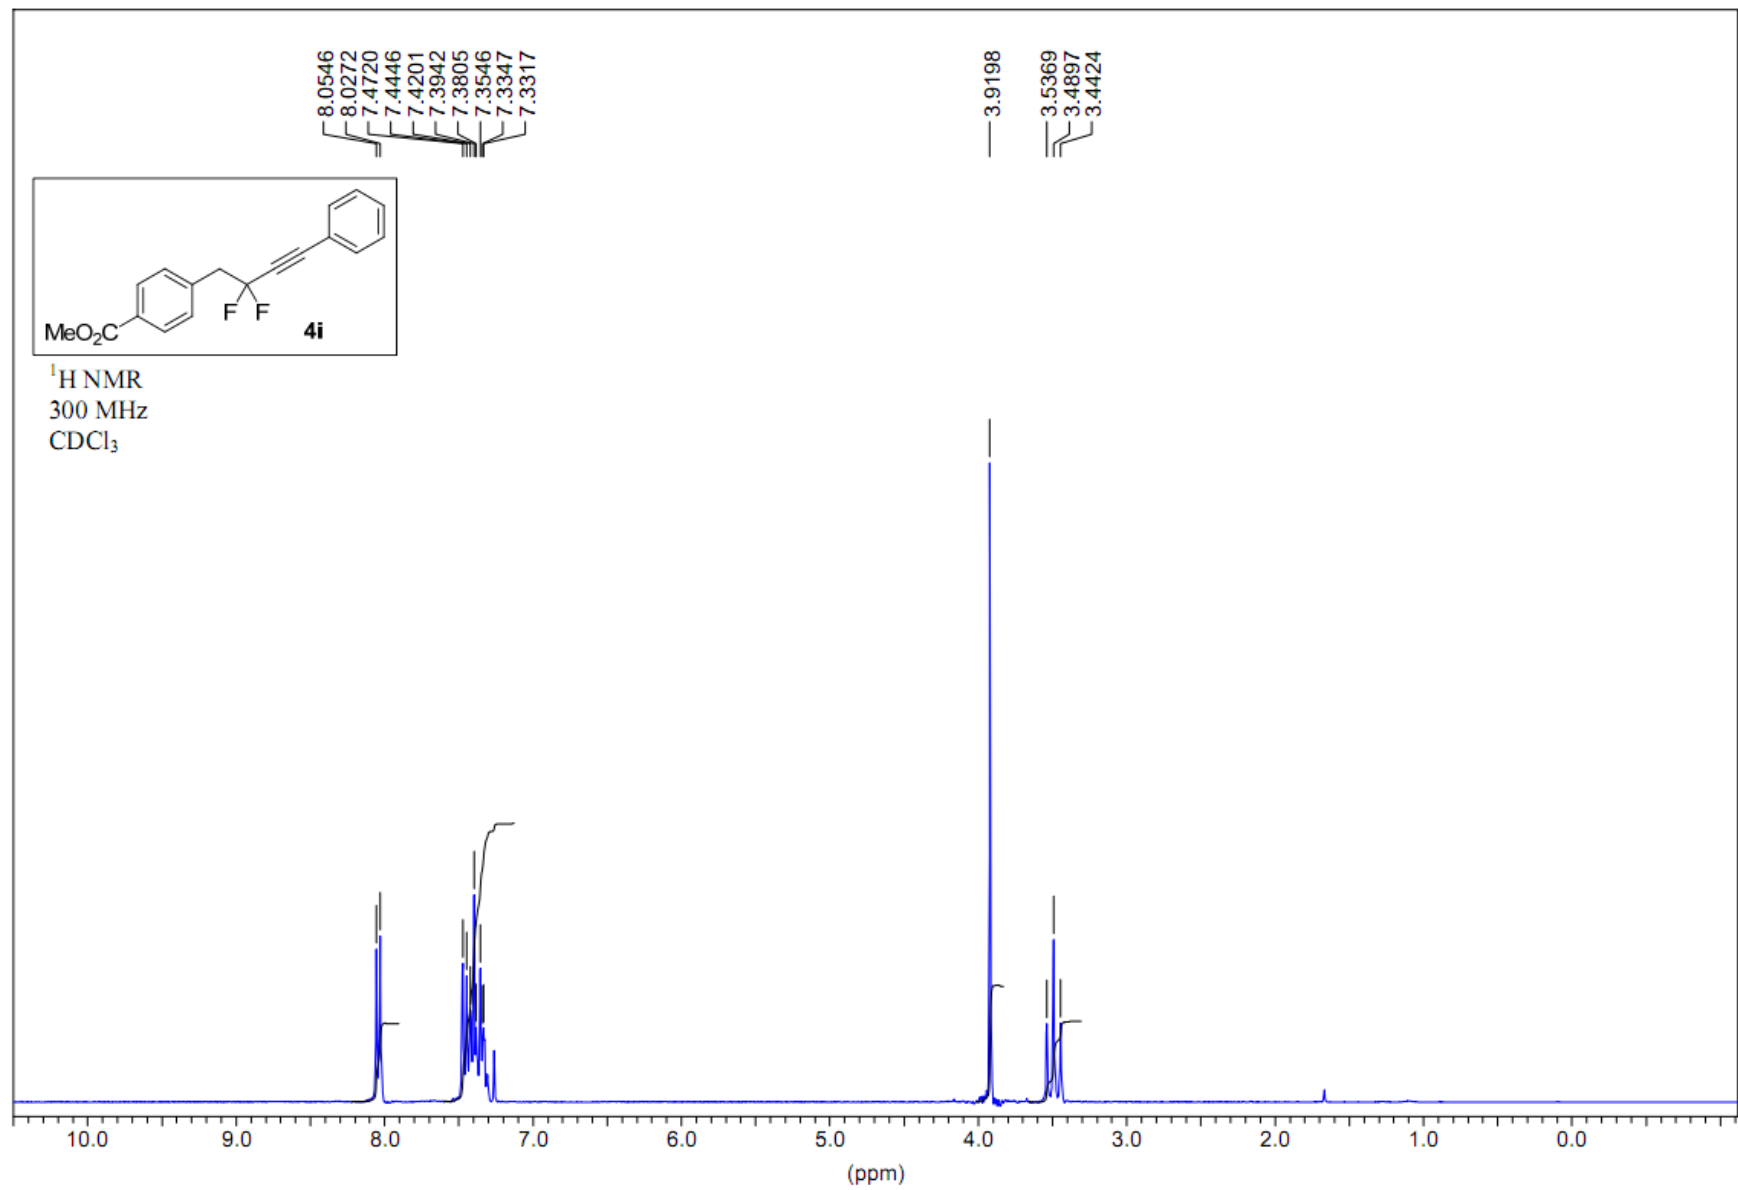



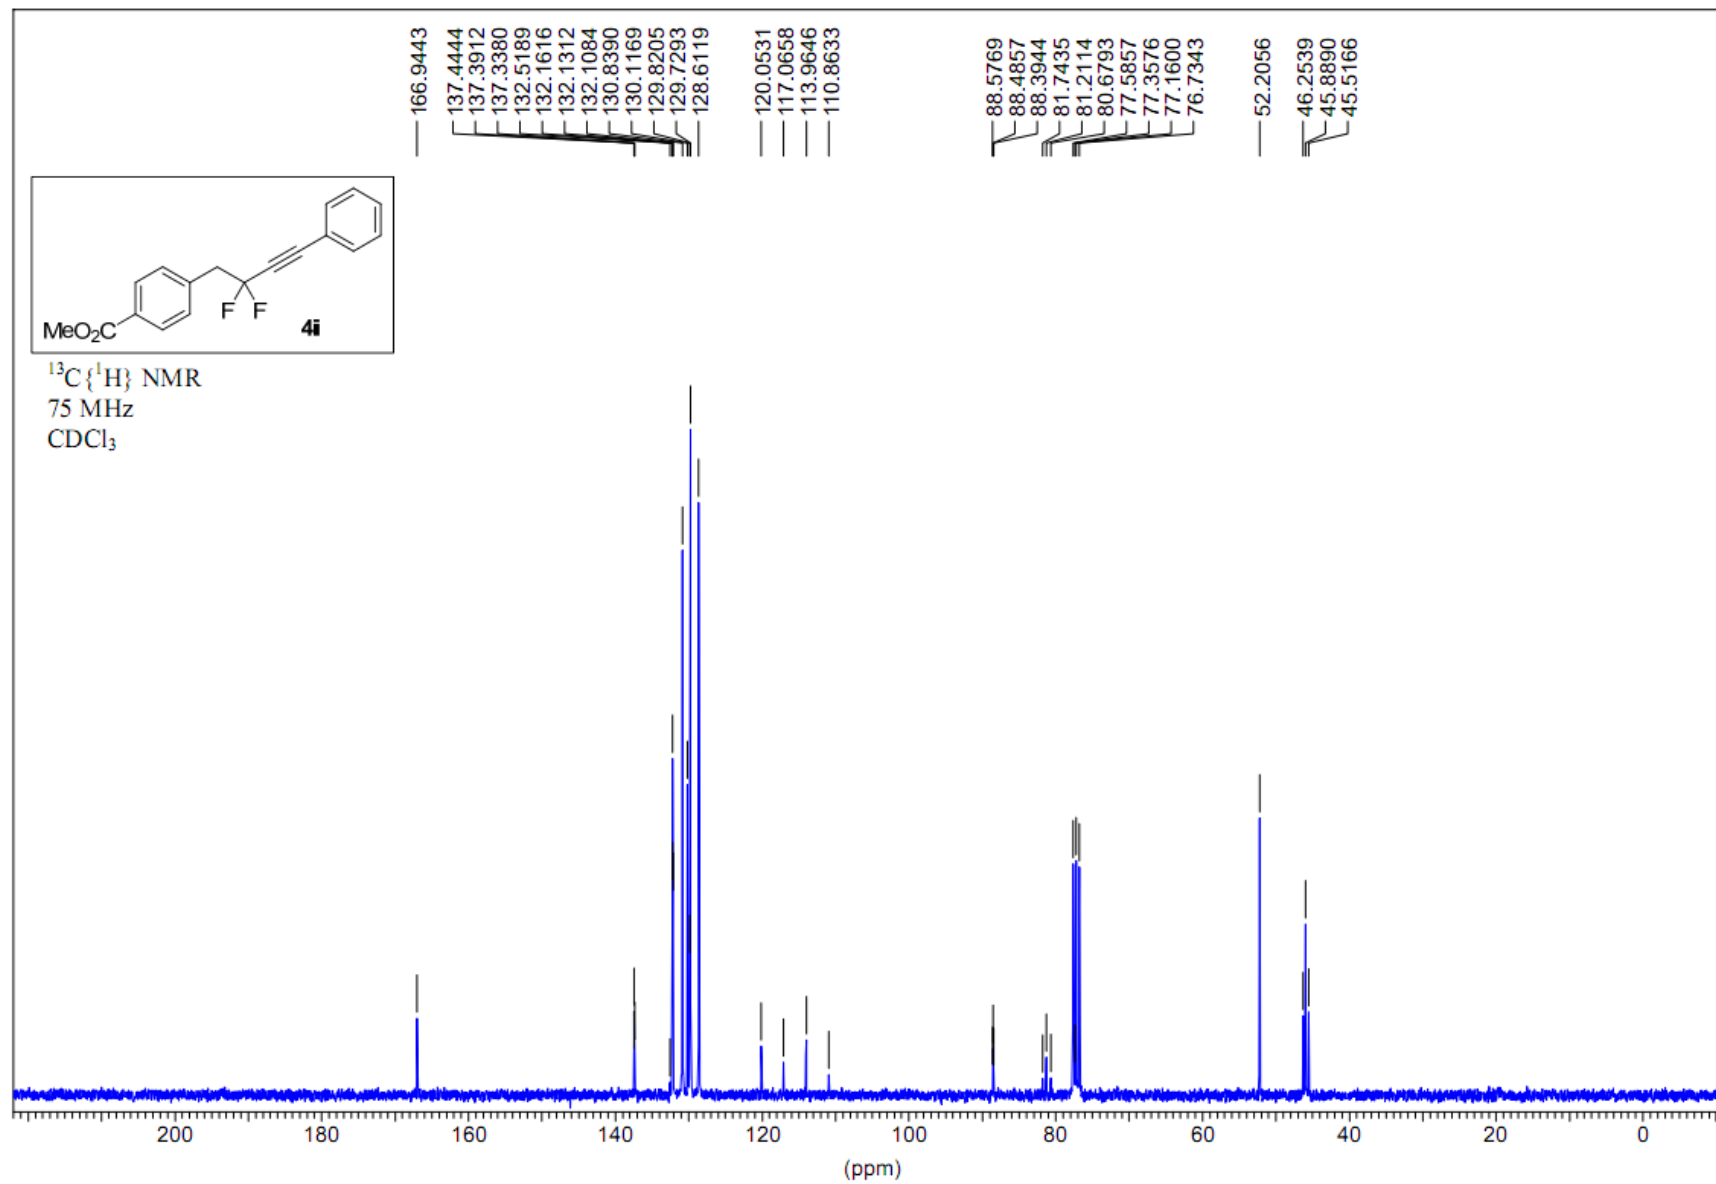

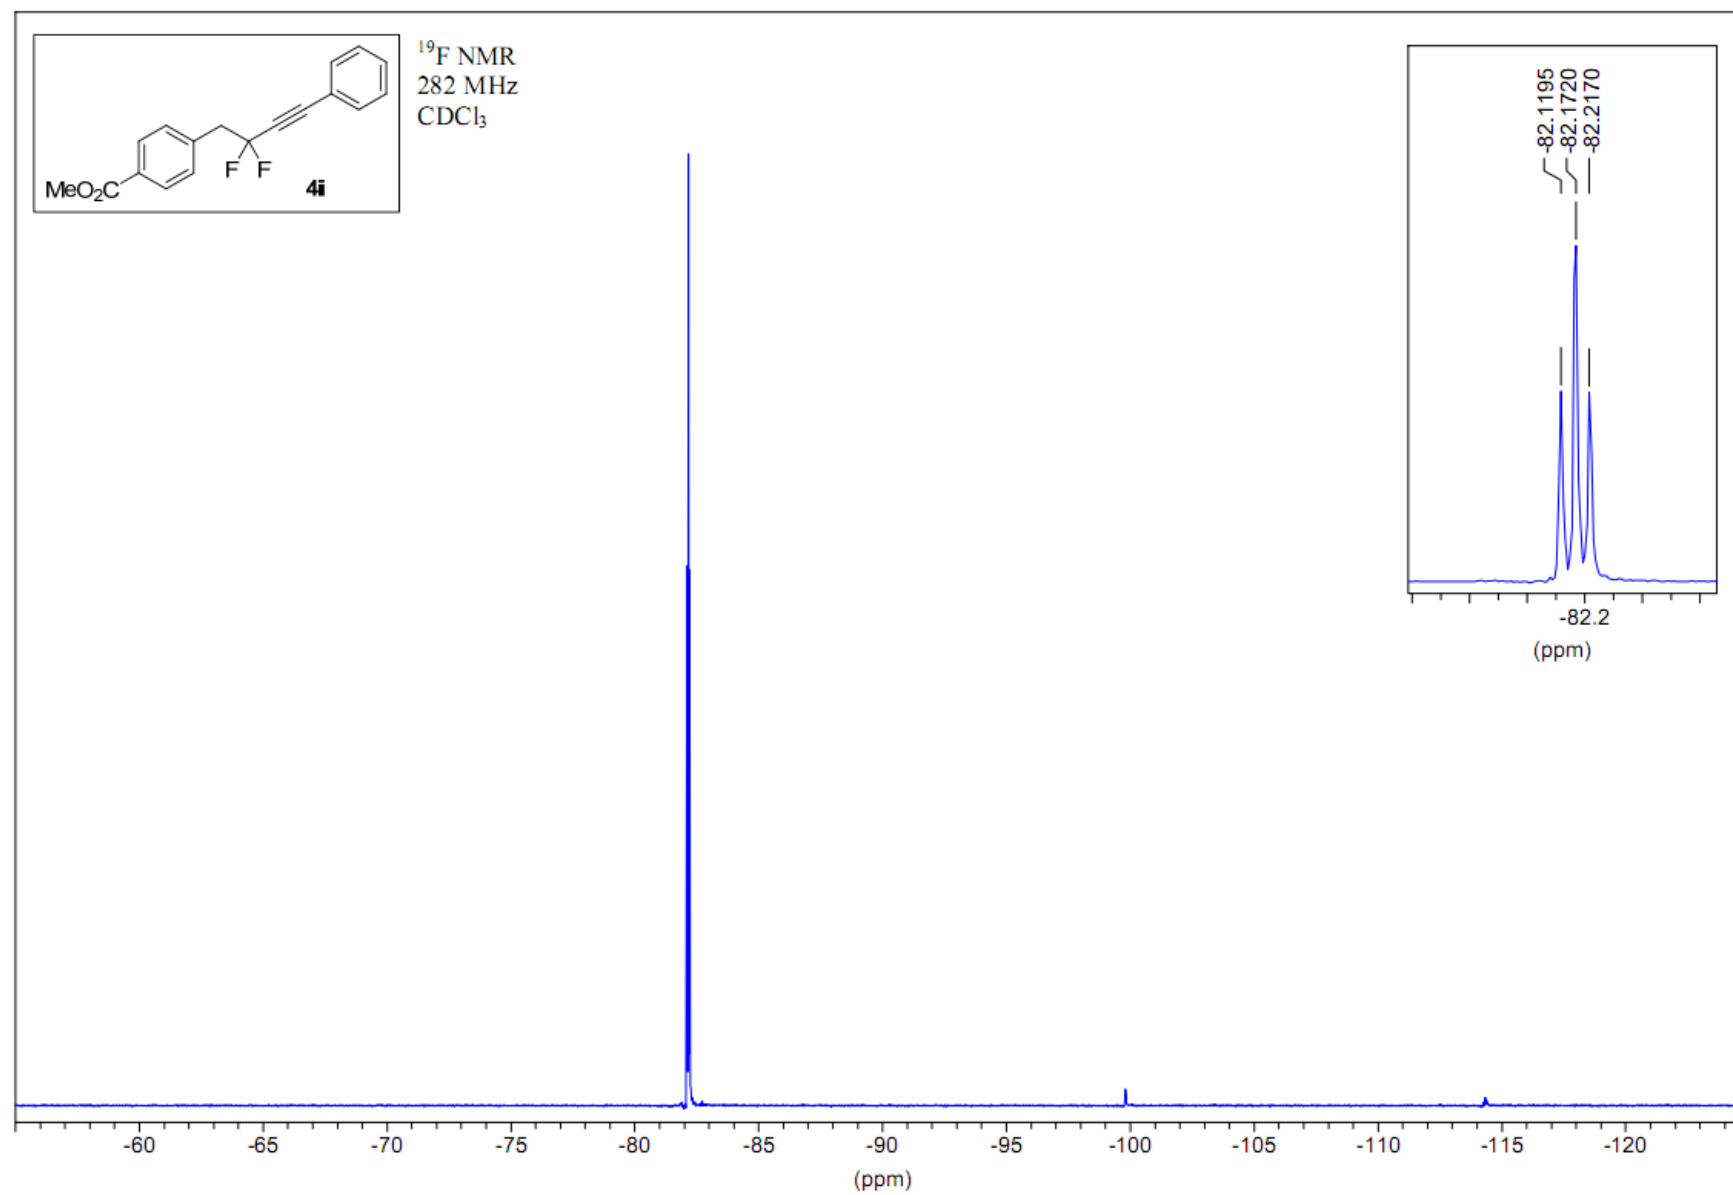

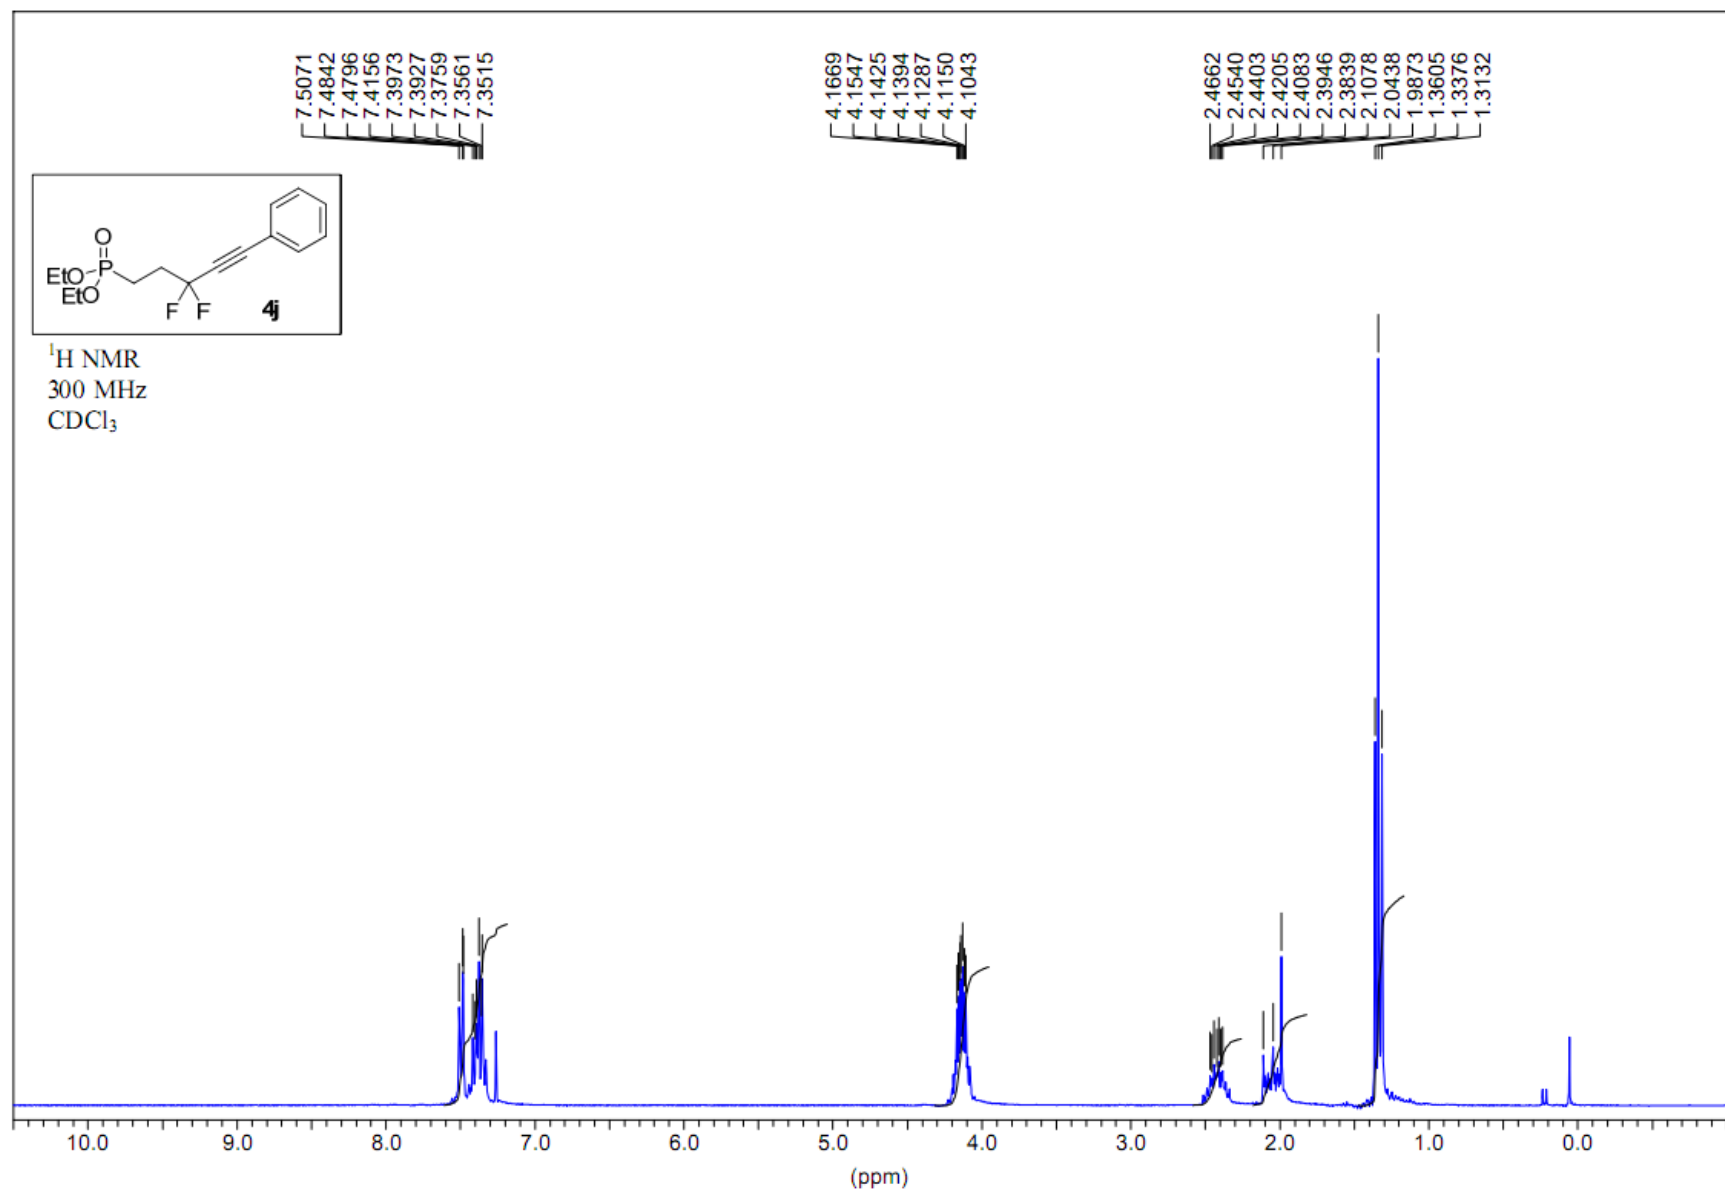

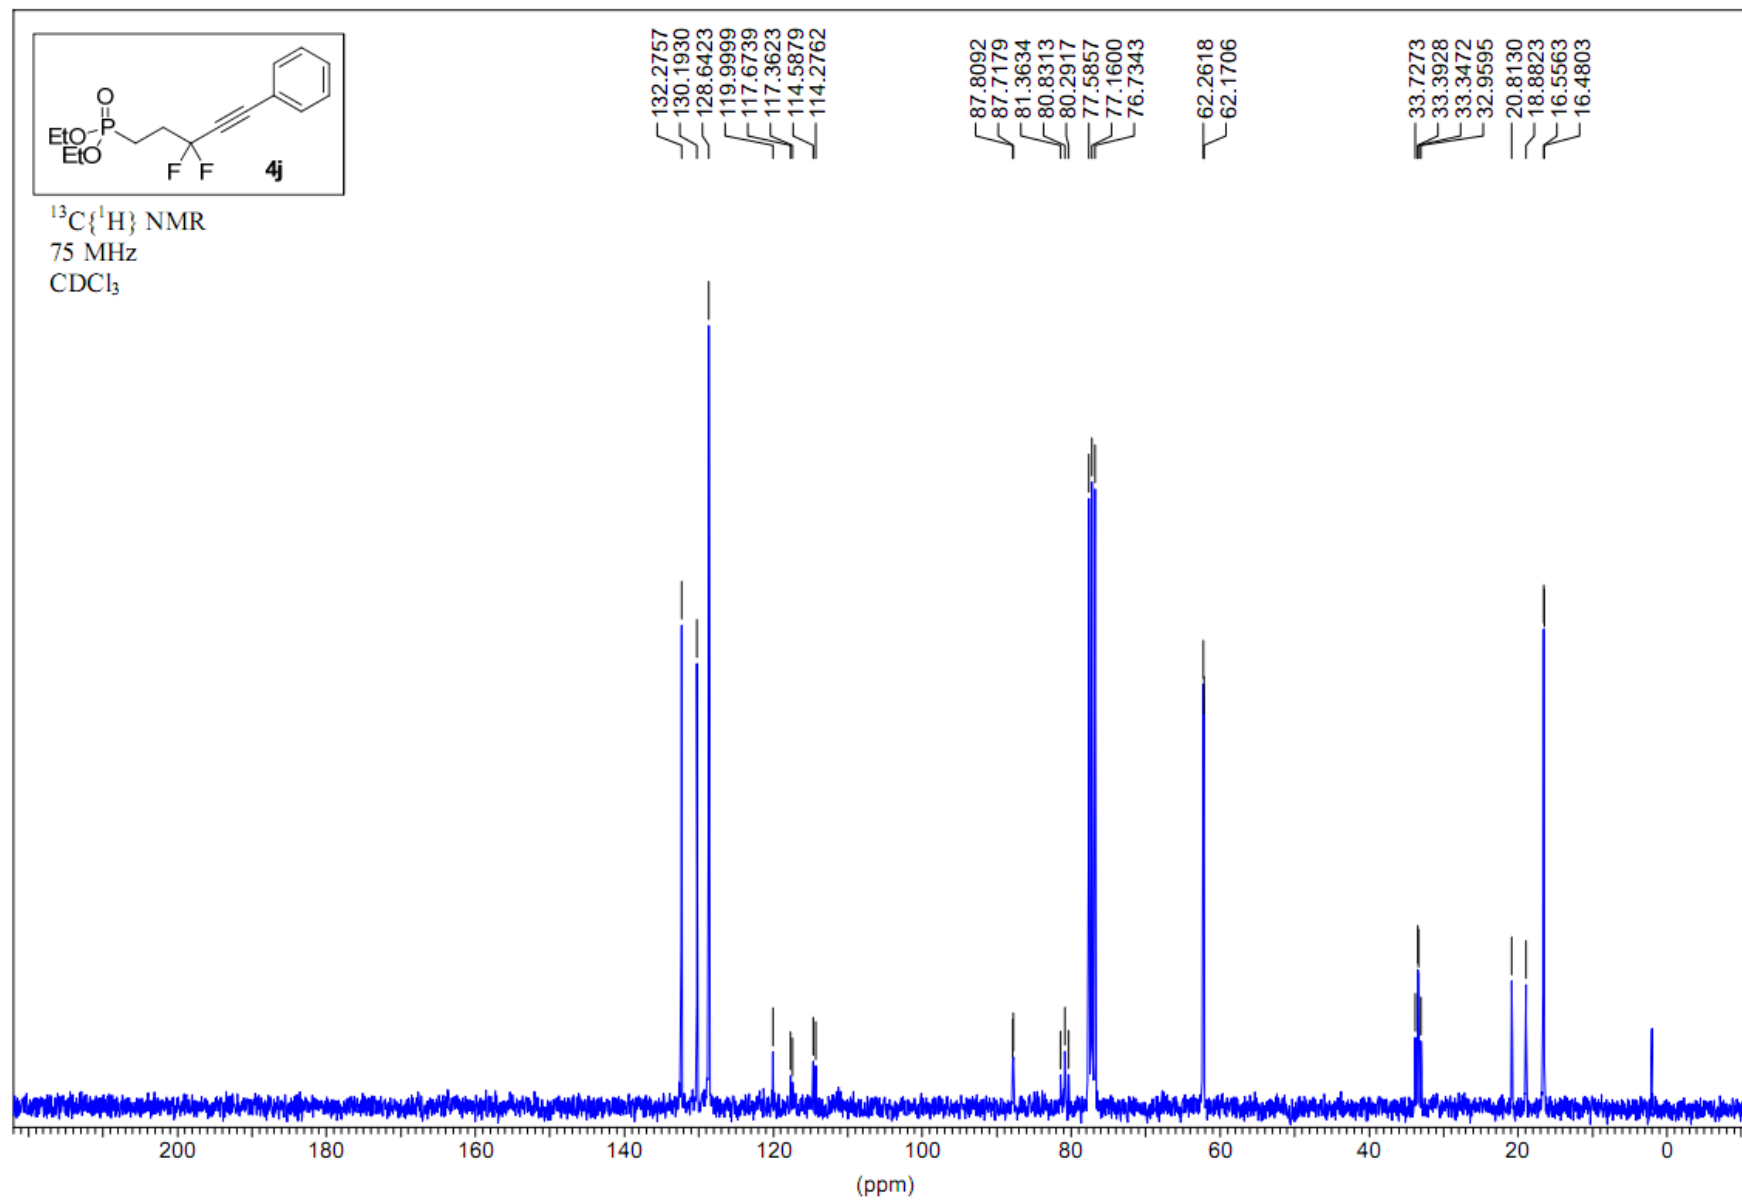

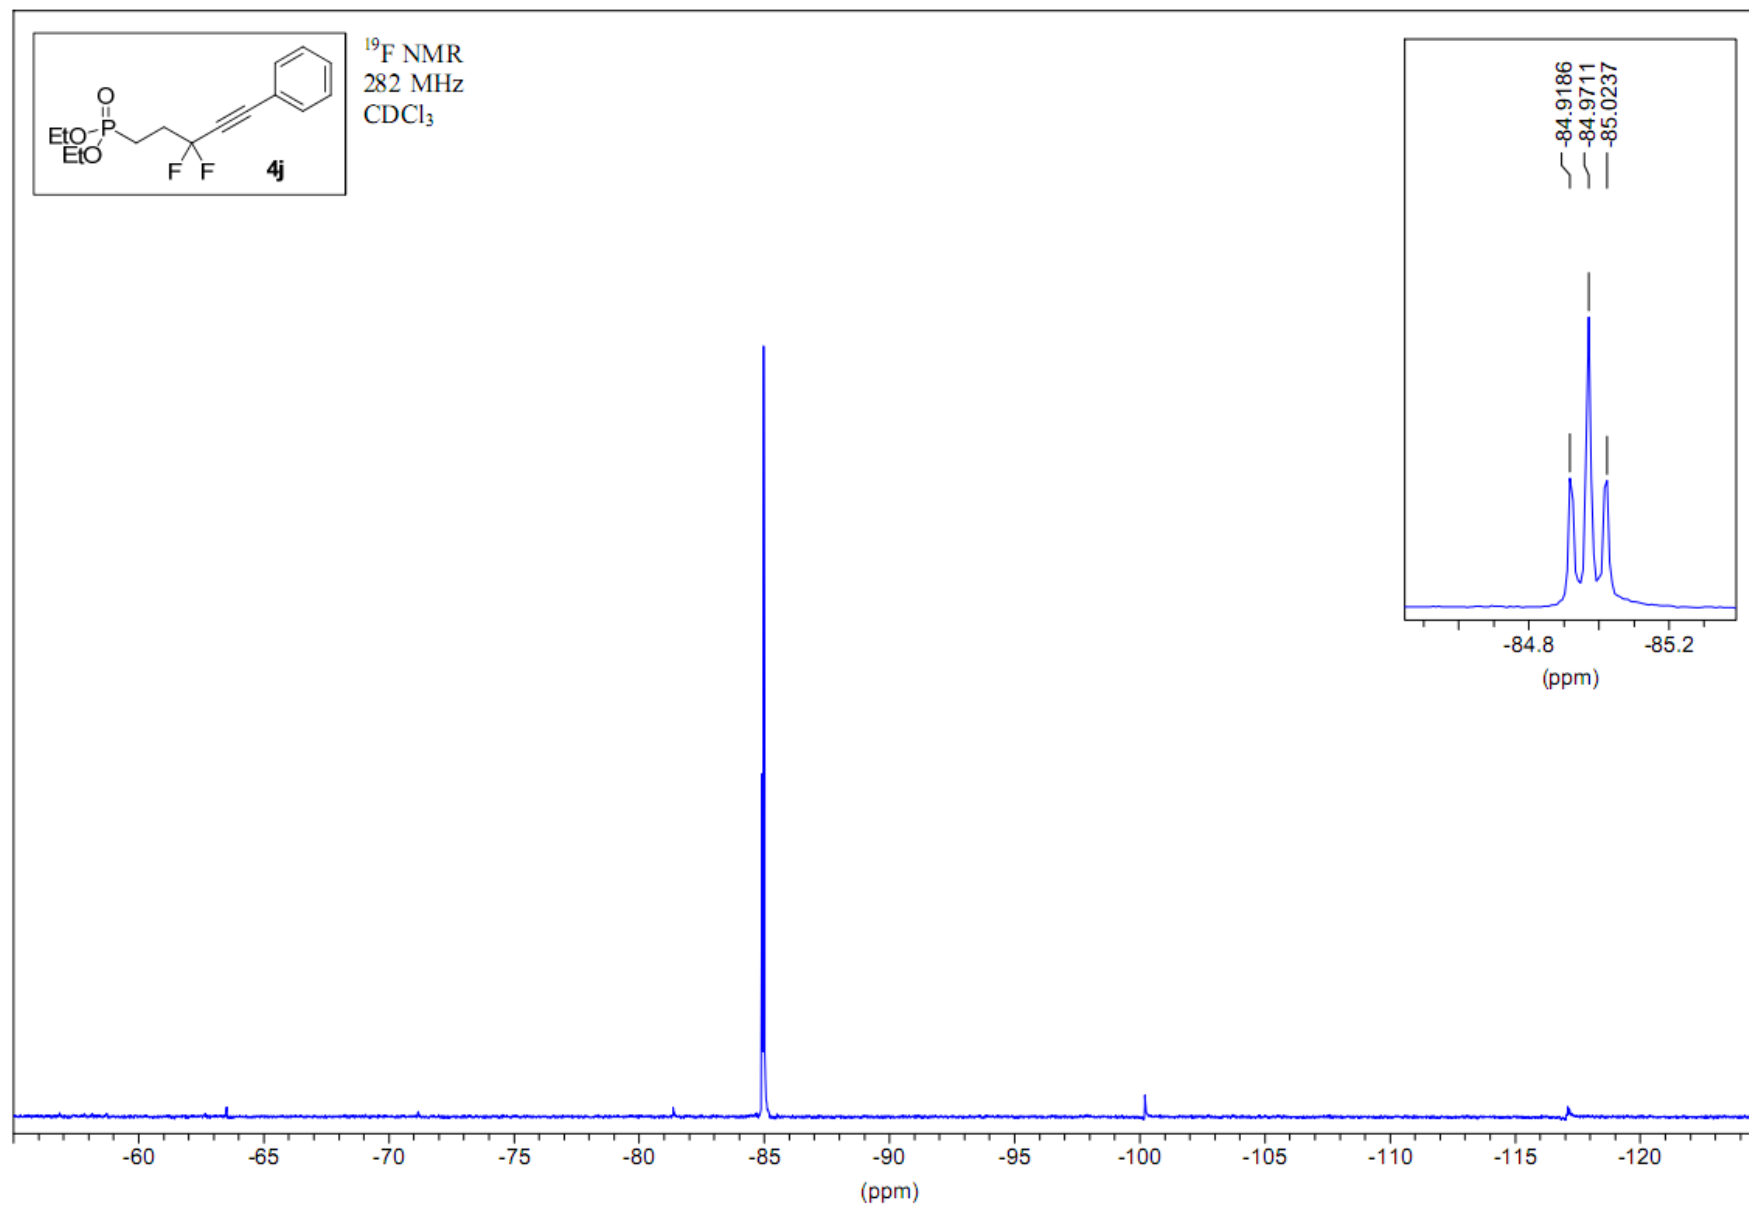

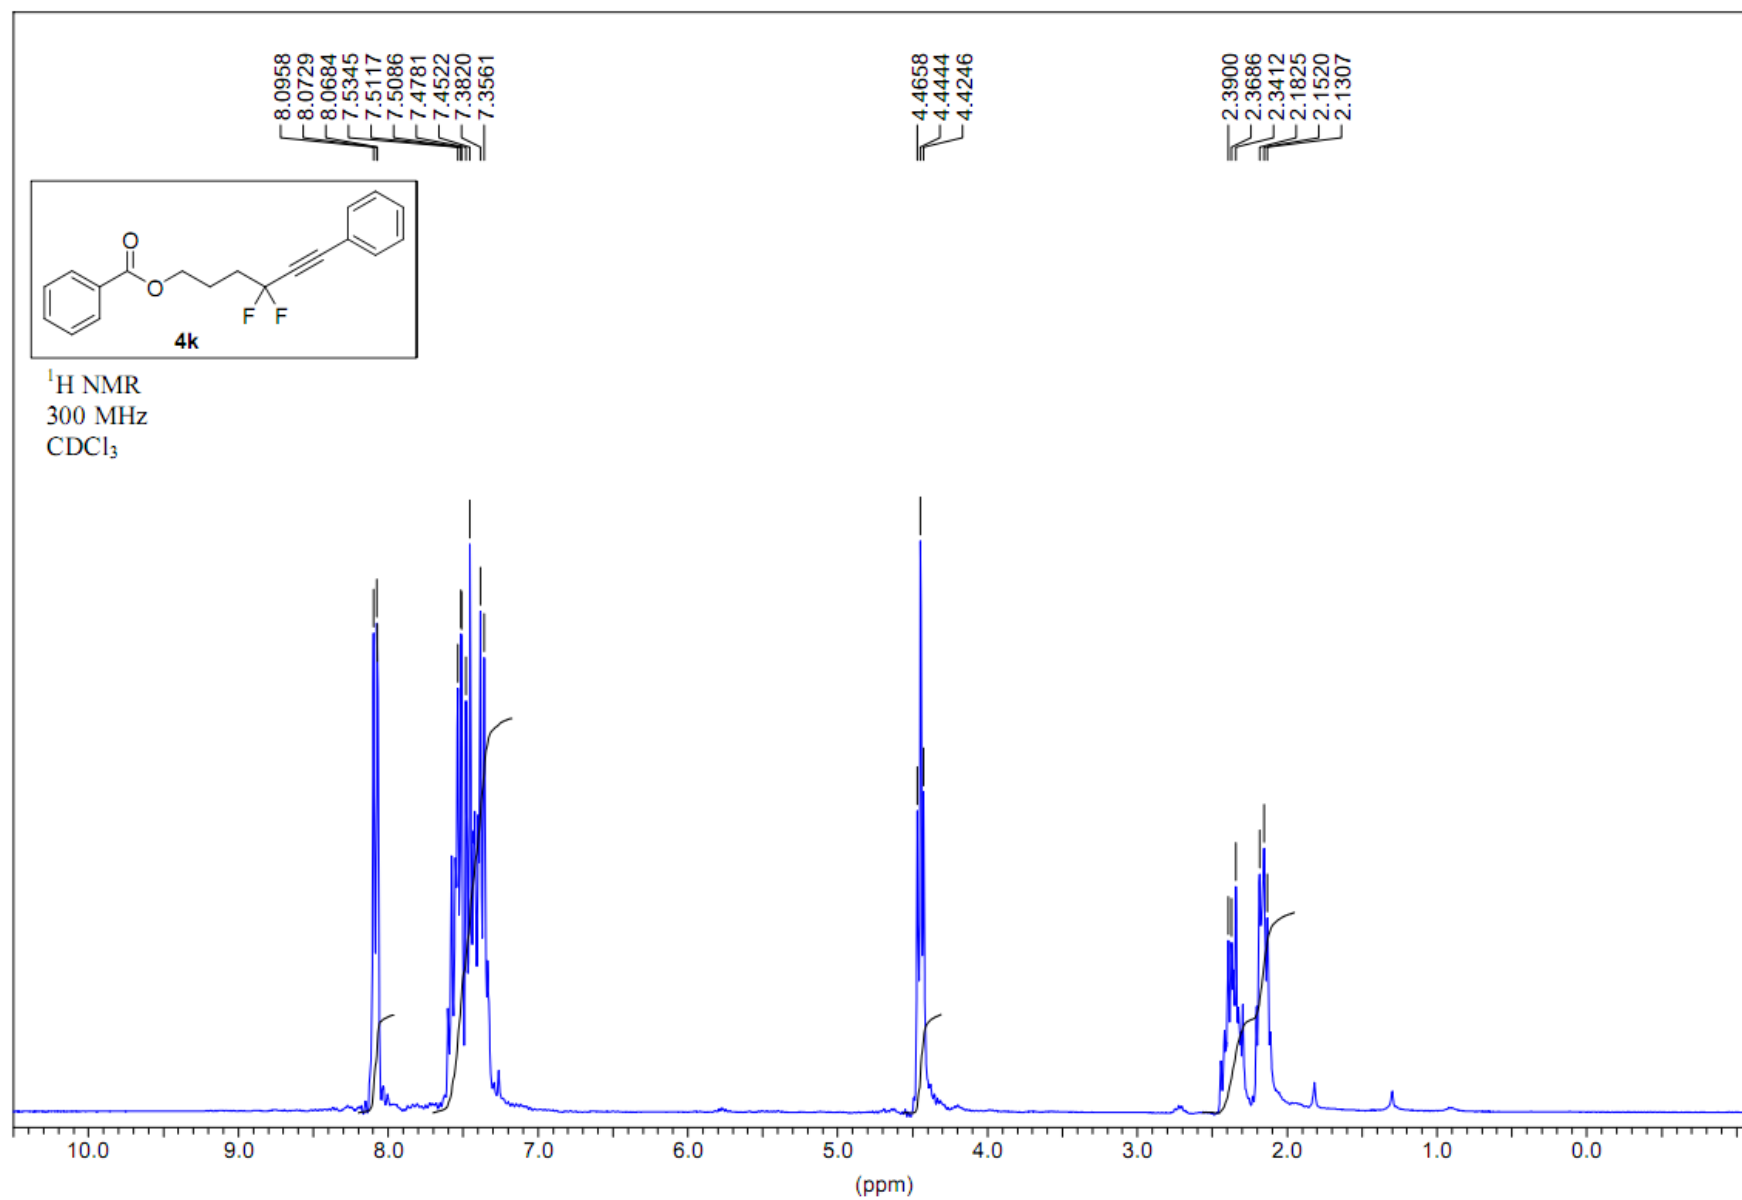

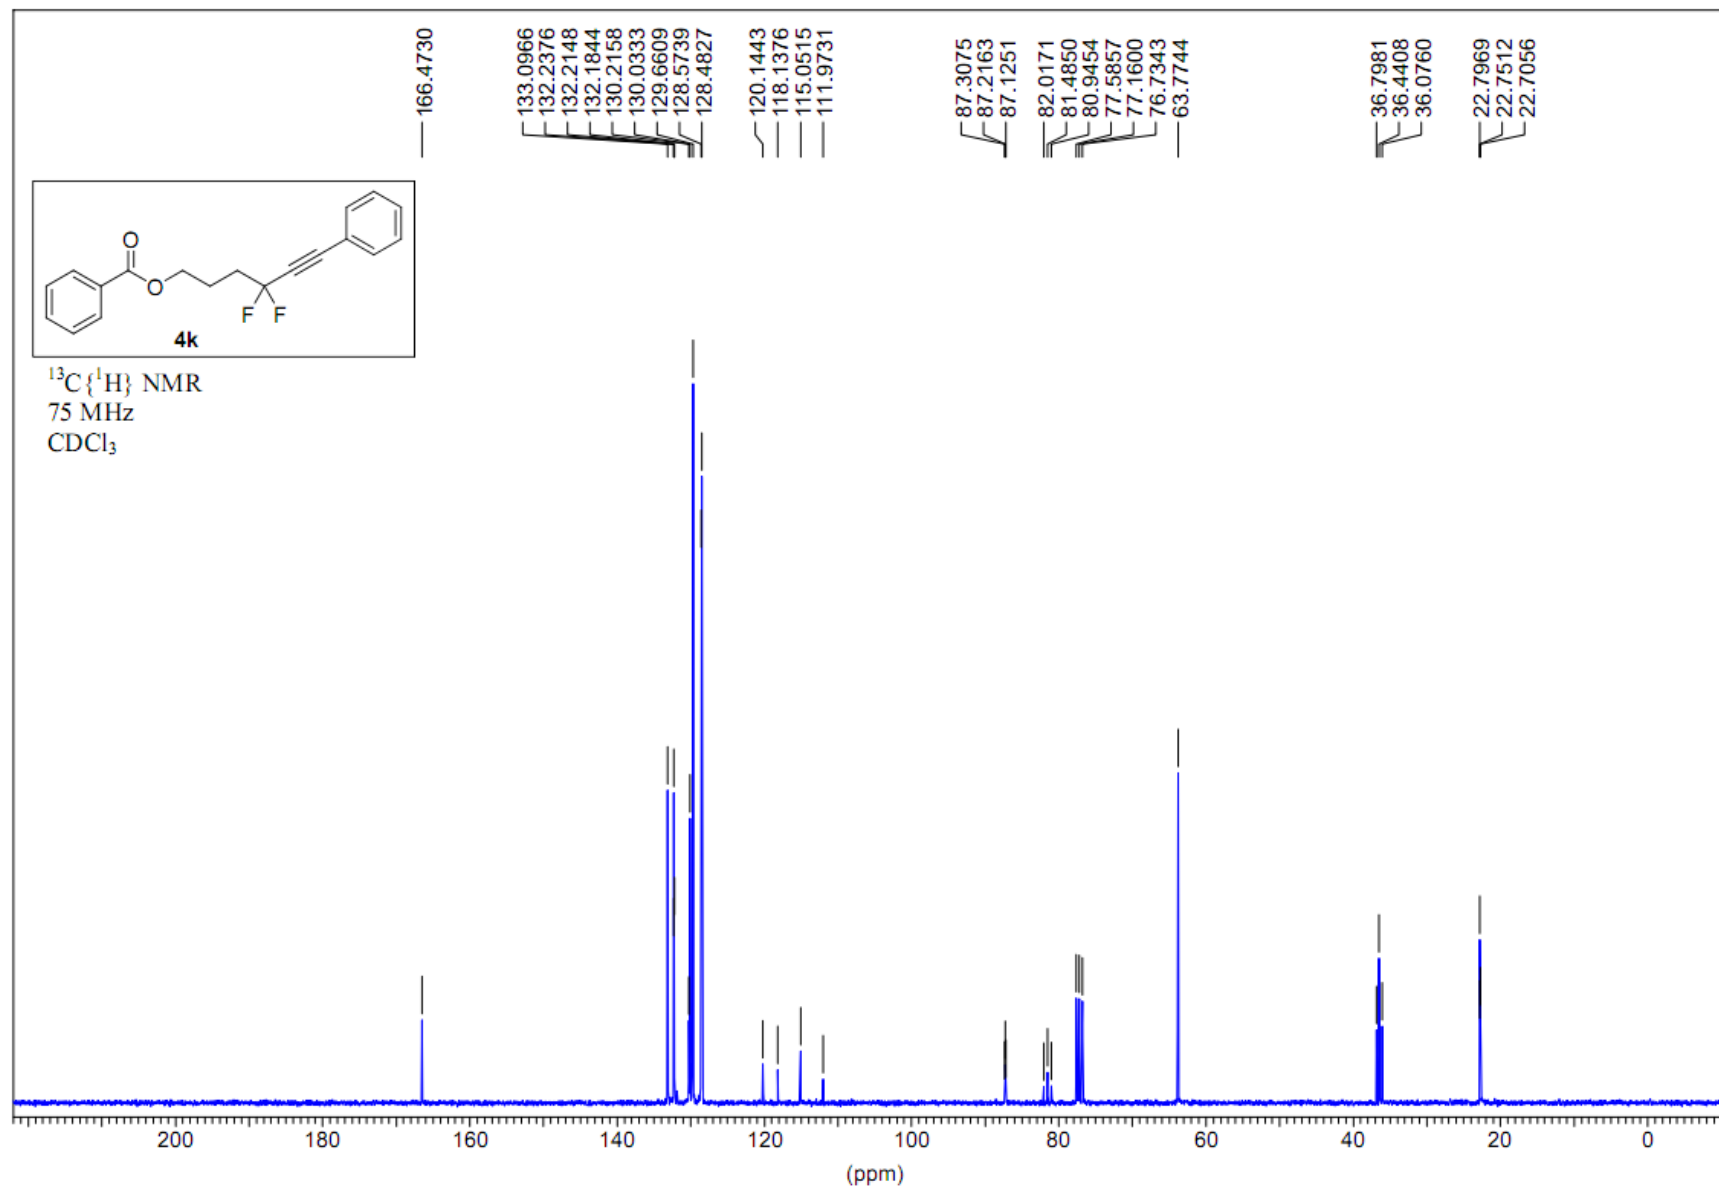

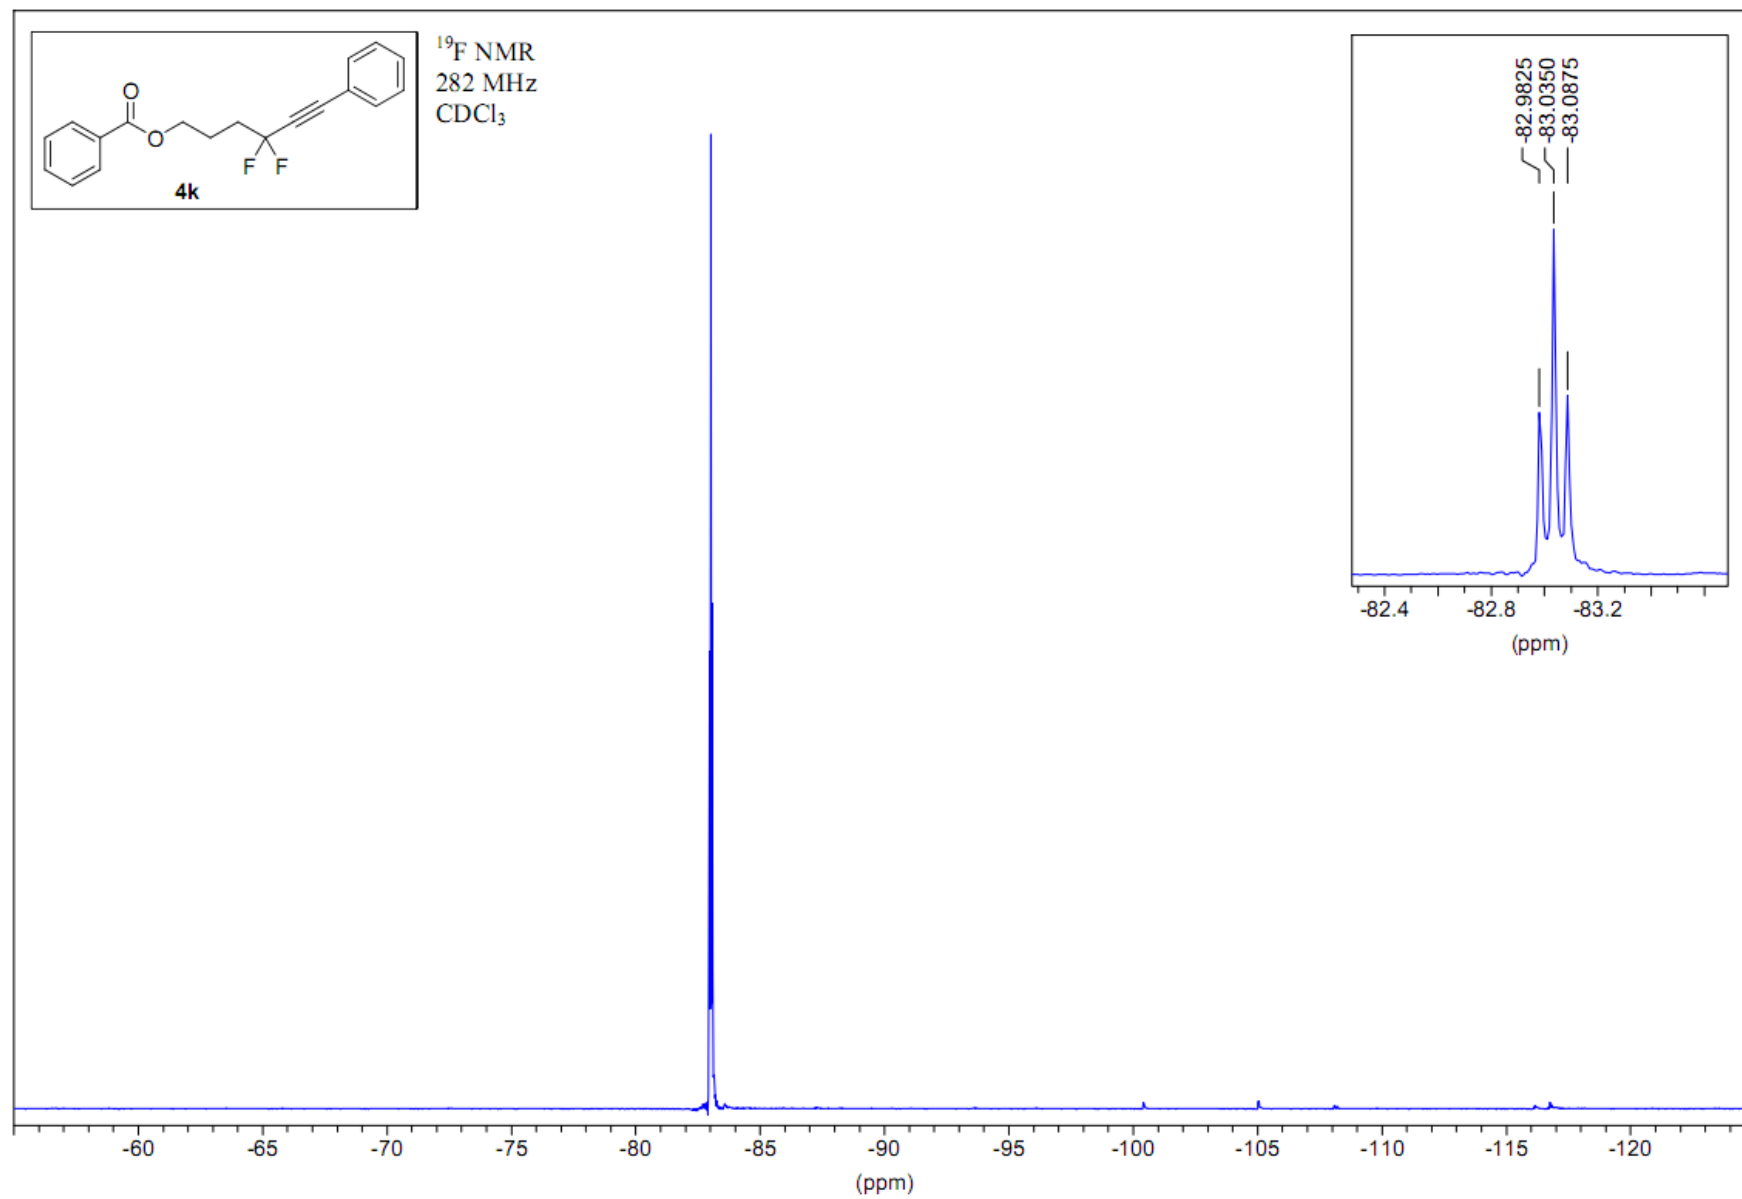



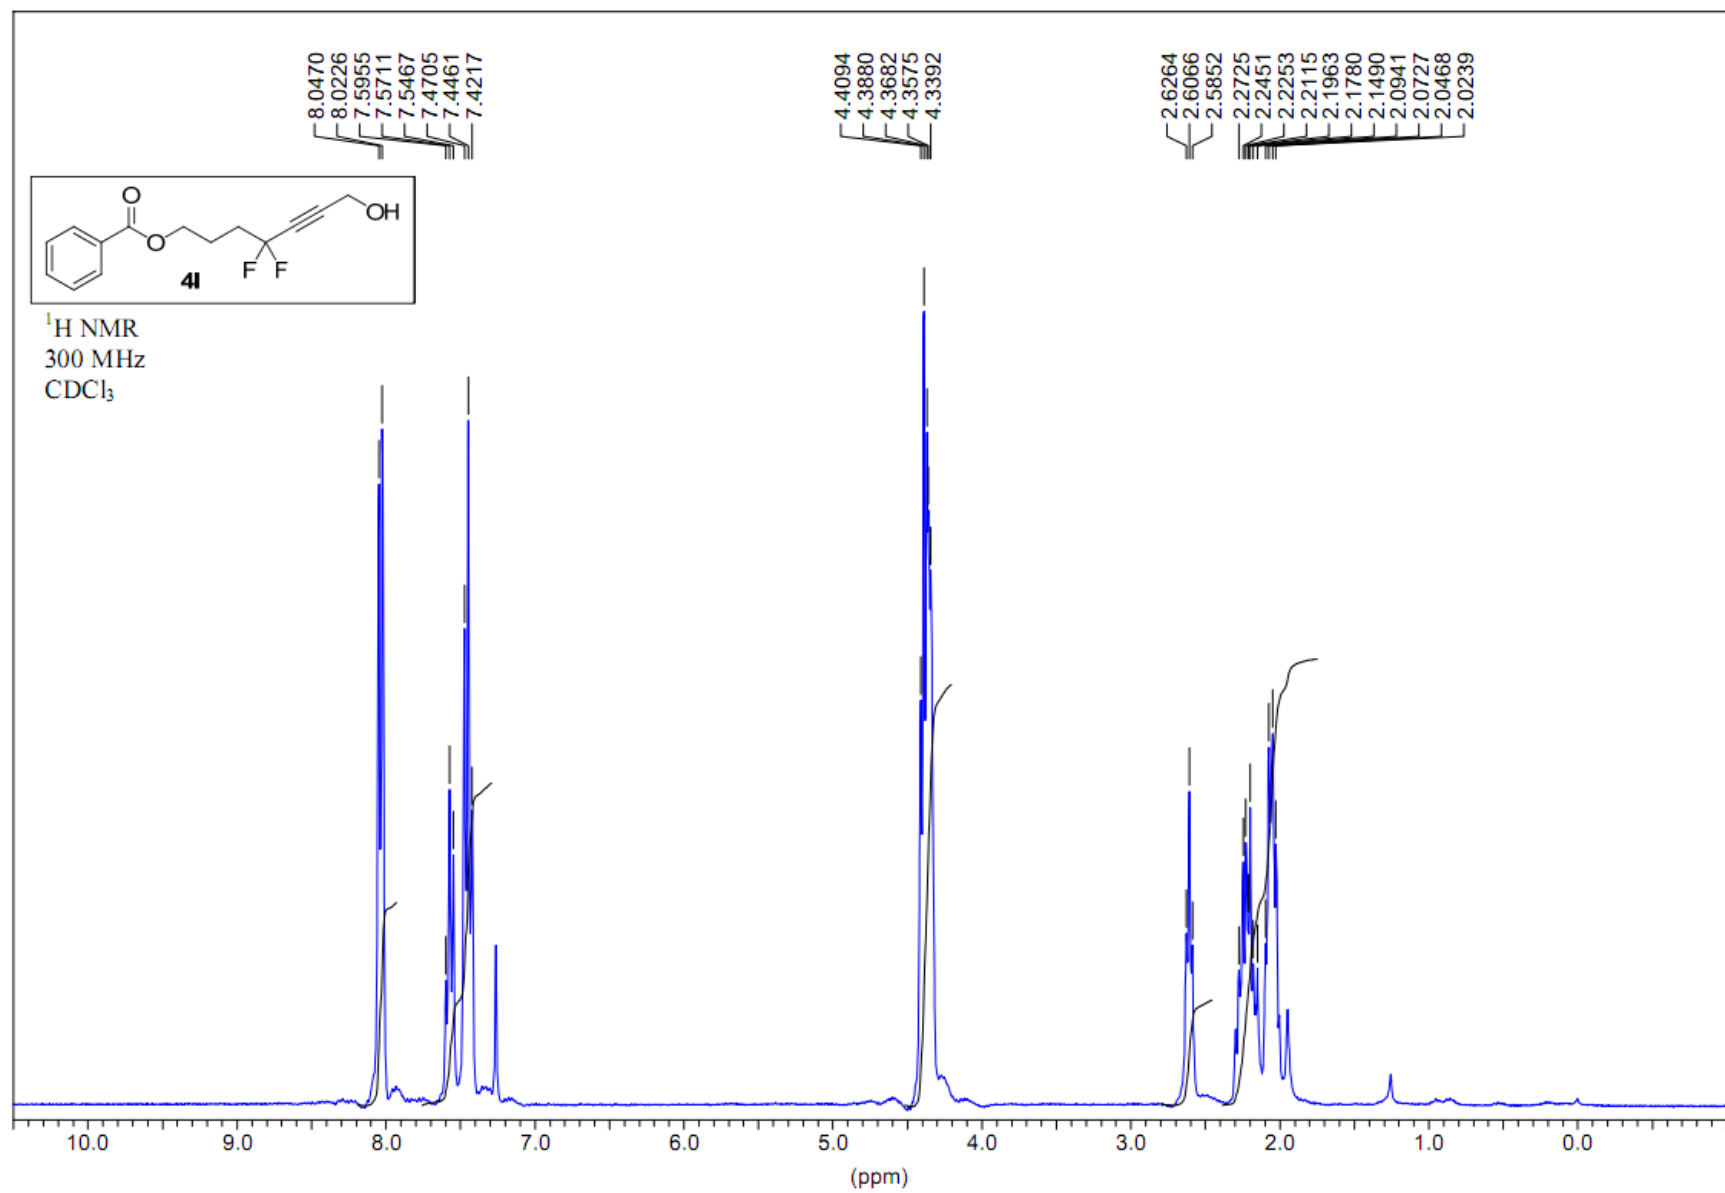

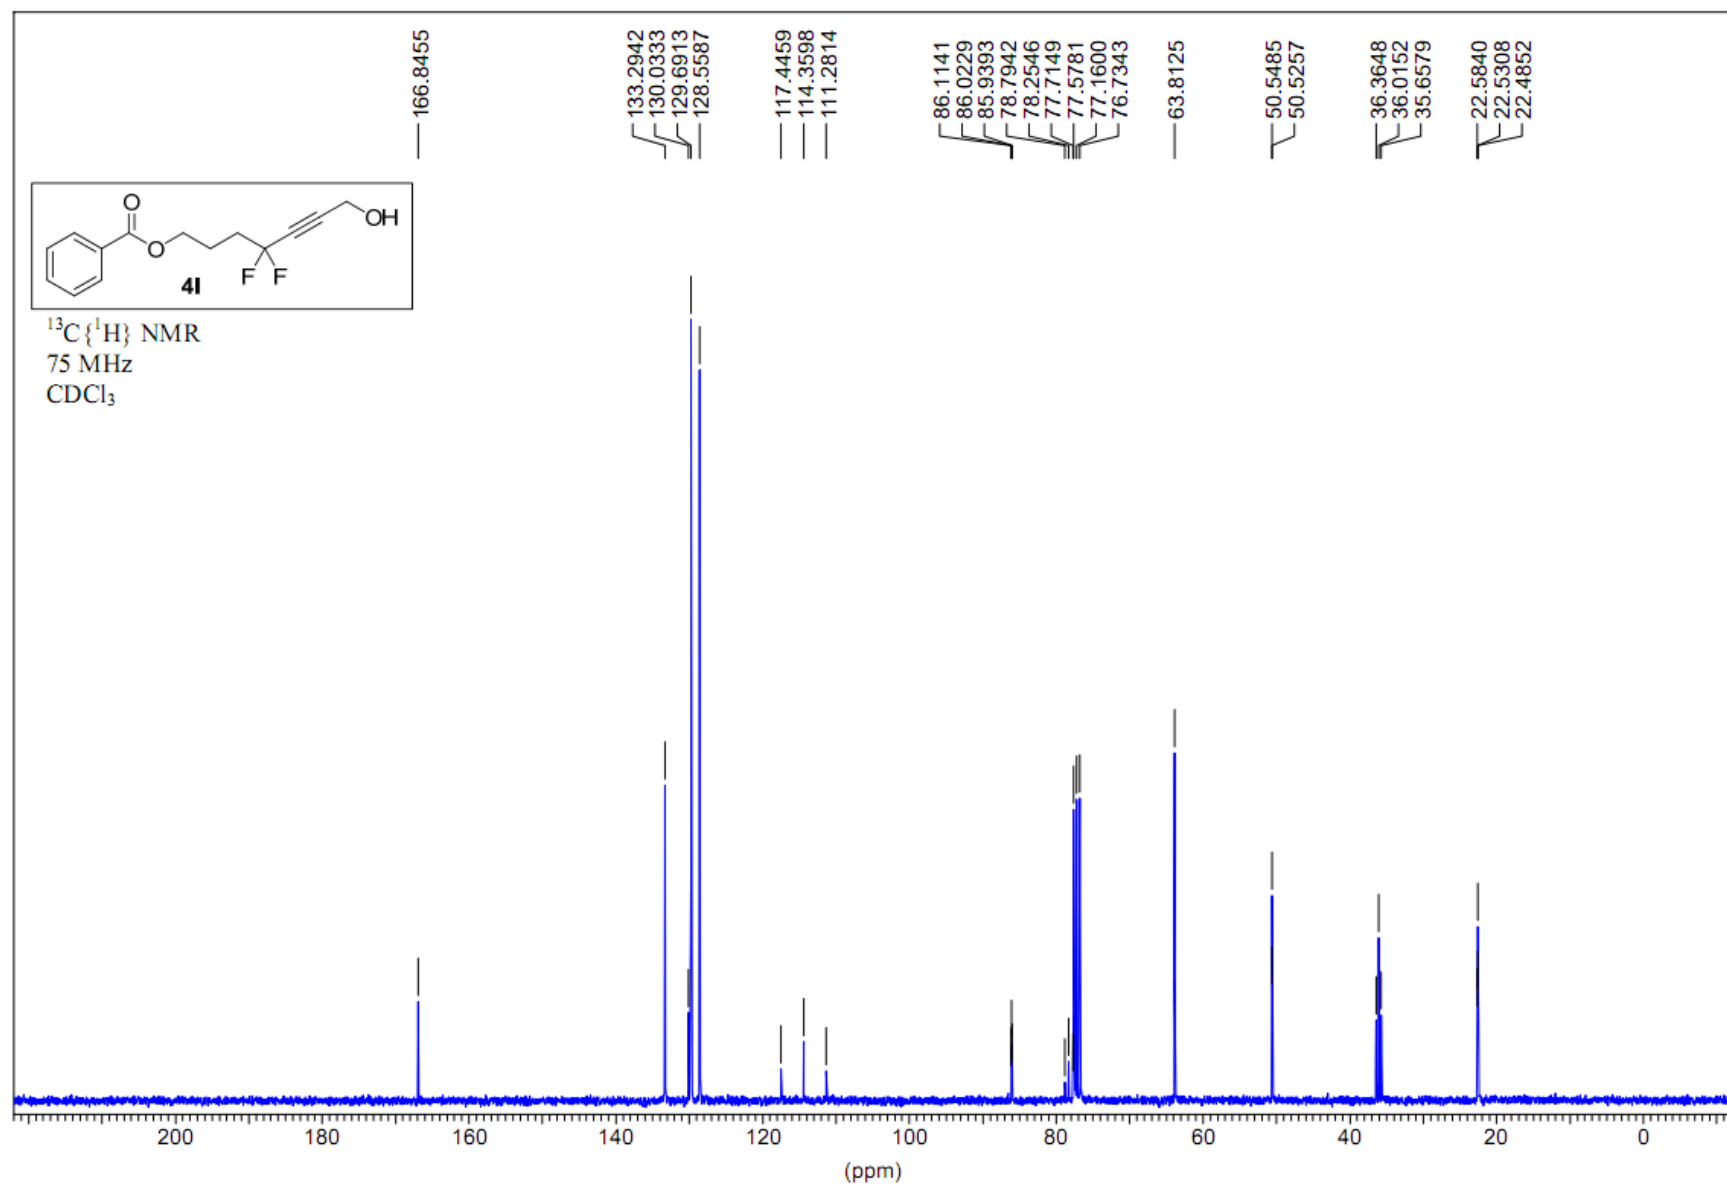

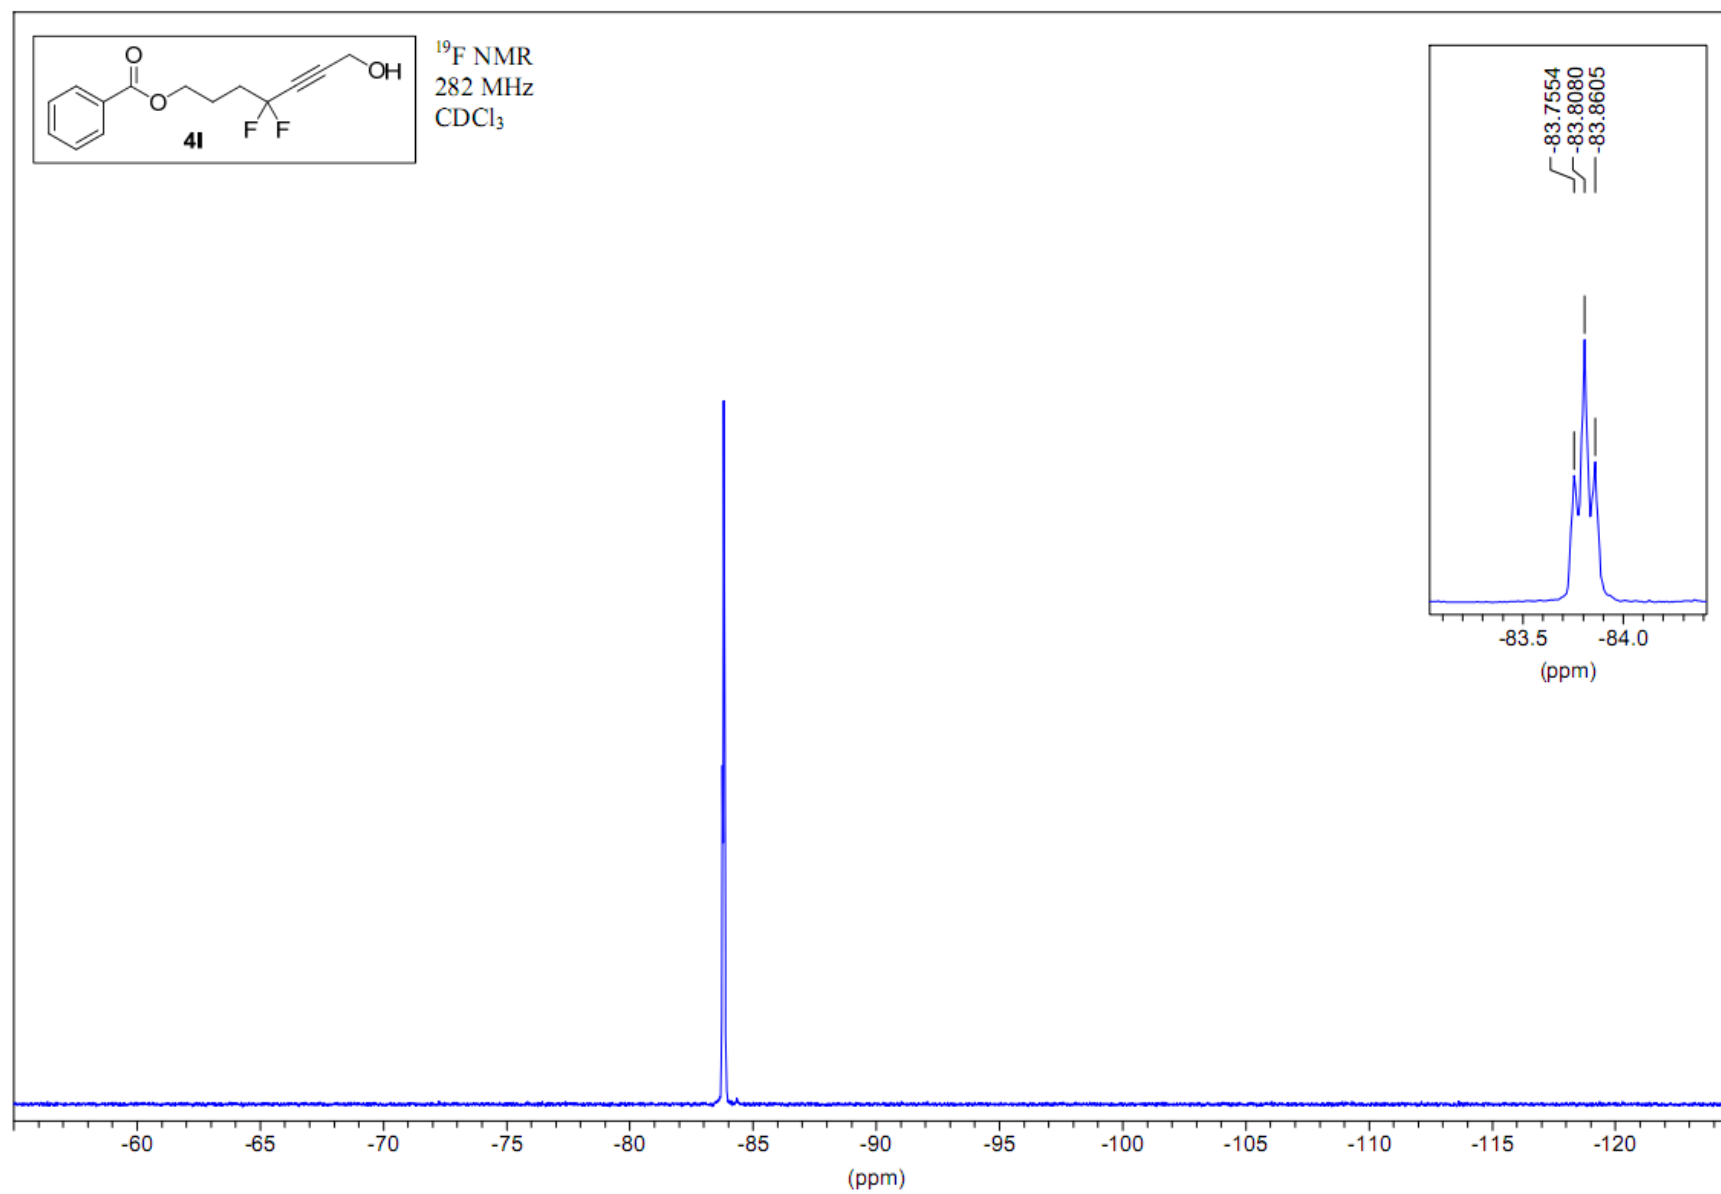

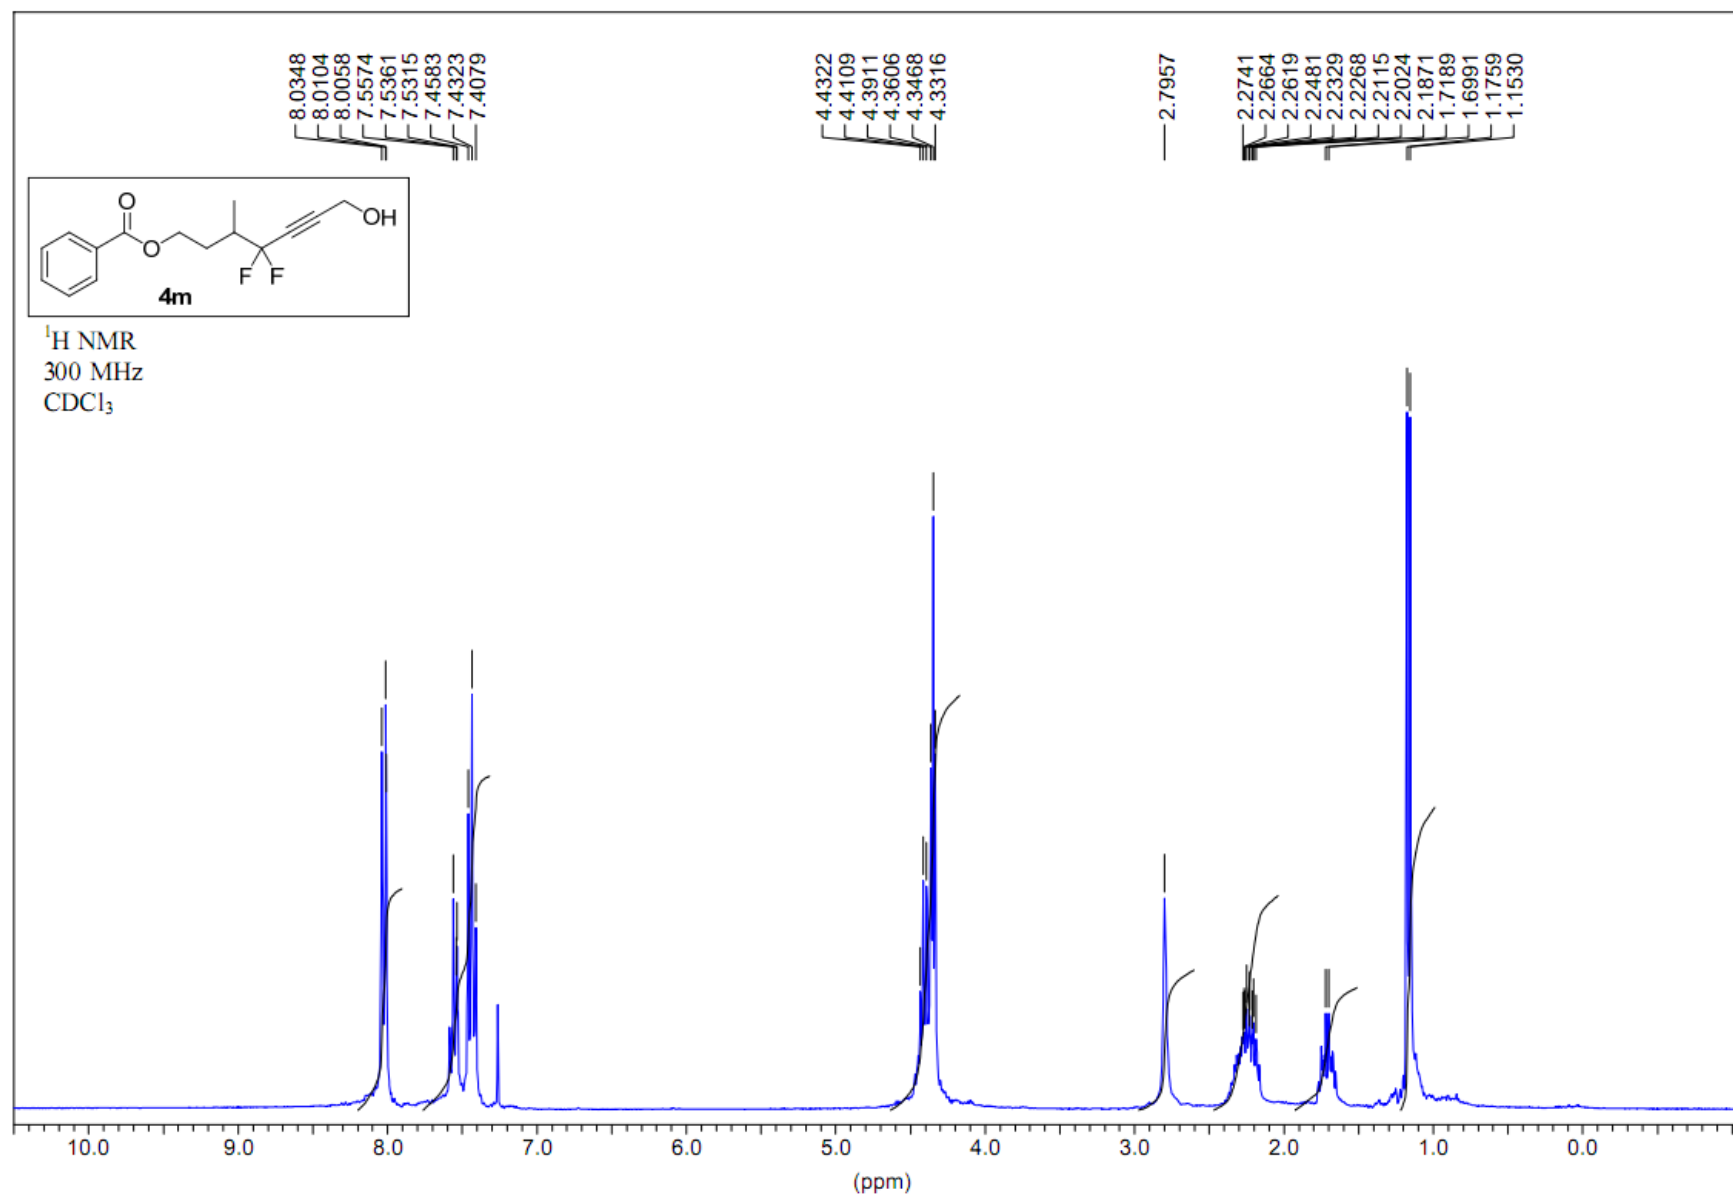

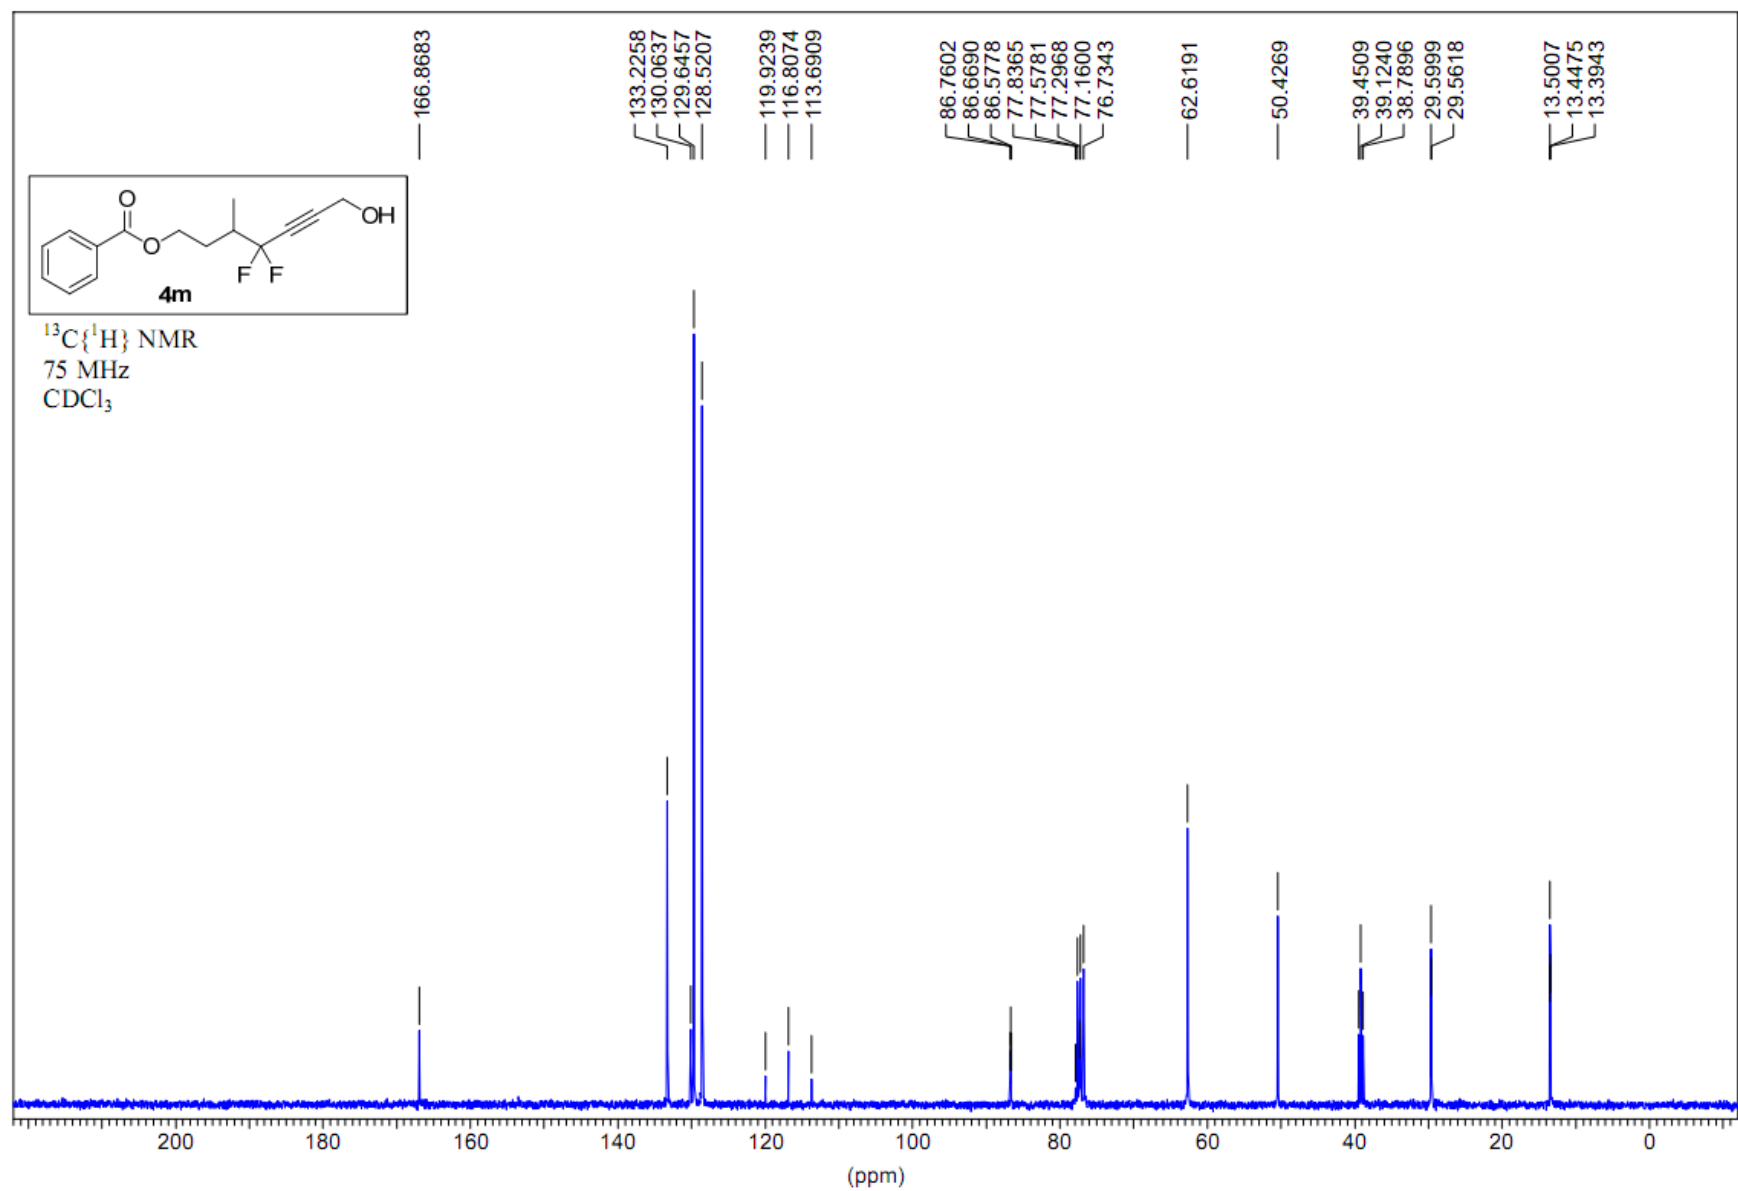

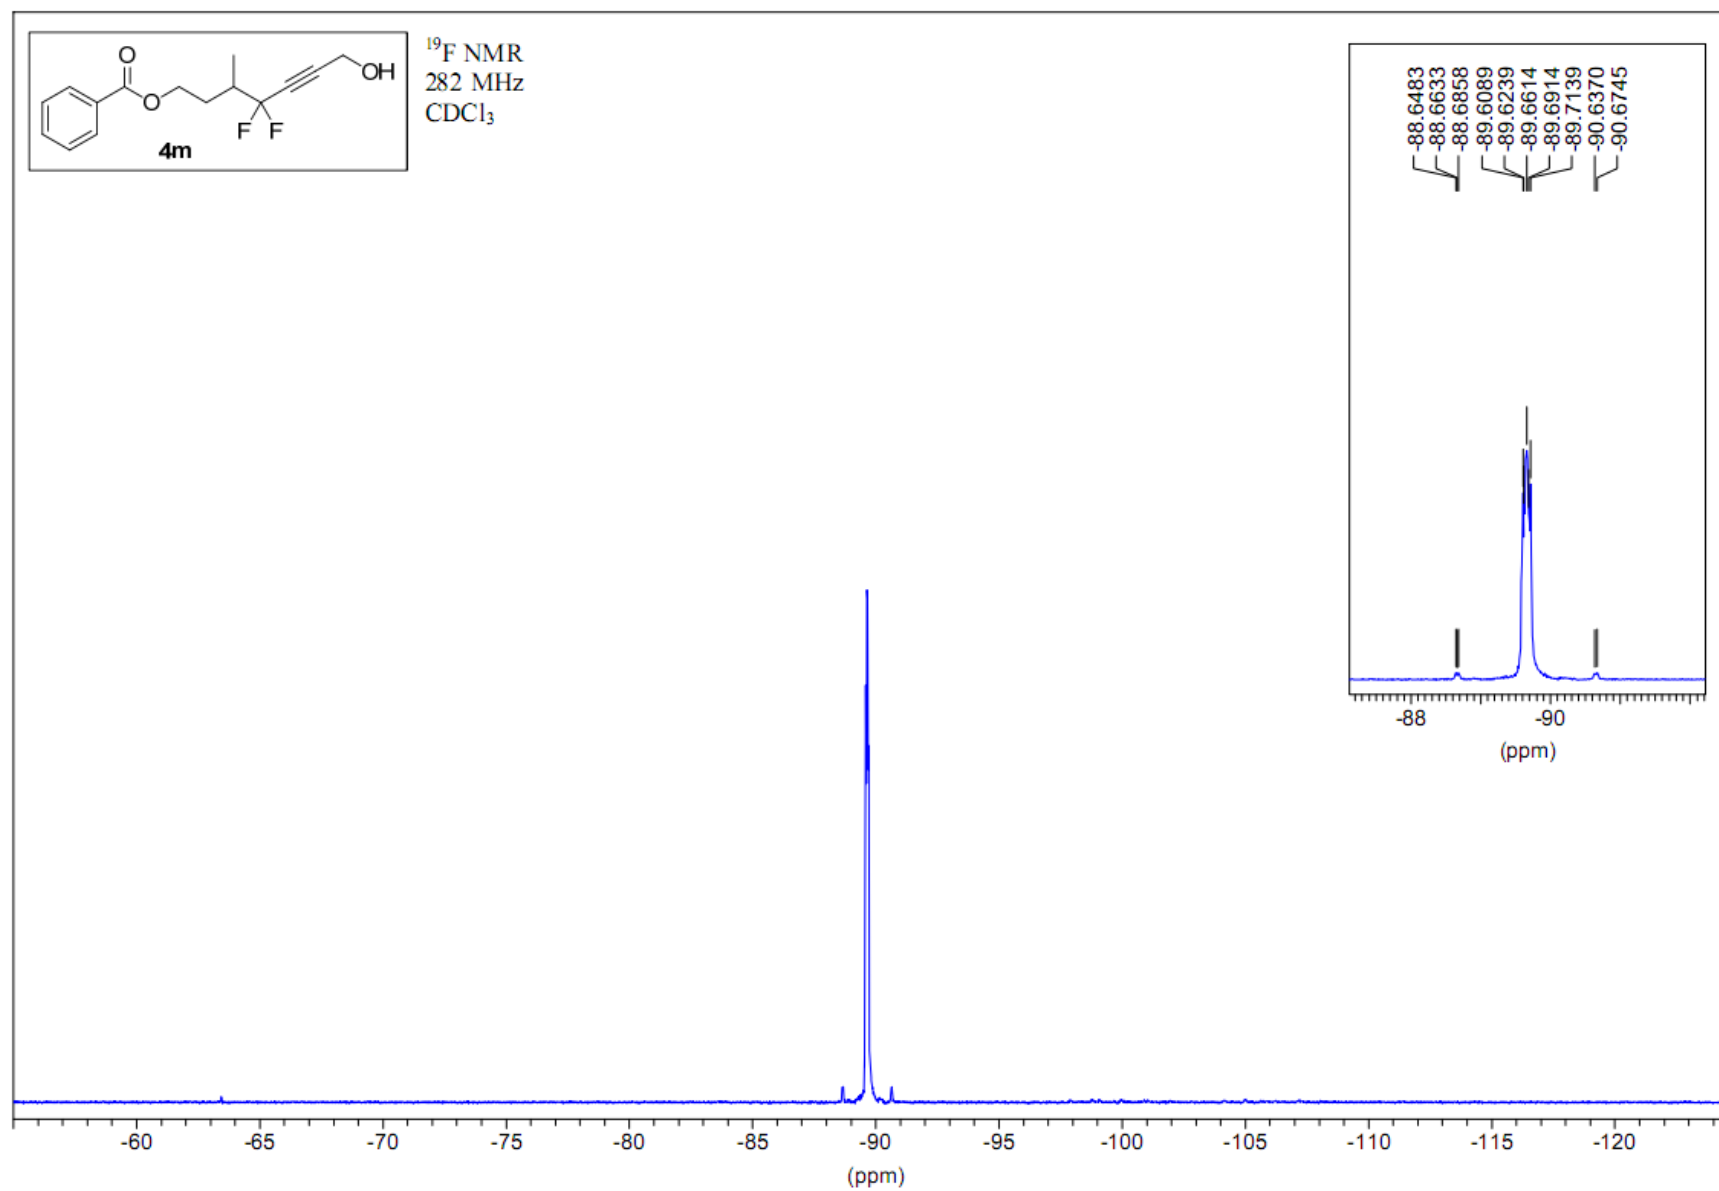

Supplement: Additional file 1 [file 1860-5397-11-231-S1.pdf]
